# Supplementary material
Source: Royal Society of Chemistry journal article supplement (doi:10.1039/d6gc01030j)
Supplement: d6gc01030j1.pdf [file d6gc01030j1.pdf]

# **Electroreductive deconstruction and oxygenation of cyclic amines**

Shiv Dutt, Neelam Duhan, Vikas Kale, and Prabal Banerjee\*

**Department of Chemistry**

**Indian Institute of Technology Ropar**

**Punjab**

## Contents

|                                                                                                 |         |
|-------------------------------------------------------------------------------------------------|---------|
| A. General information.....                                                                     | S4      |
| B. Preparation of the starting materials .....                                                  | S5-S8   |
| C. General setup and procedure for electrochemical reaction.....                                | S9      |
| ➤ Synthesis of $\delta$ -substituted amides .....                                               | S9      |
| ➤ Synthesis of $\delta$ -ketoamides .....                                                       | S9      |
| D. Optimization studies .....                                                                   | S10-S12 |
| ➤ Synthesis of $\delta$ -substituted amides.....                                                | S10-S11 |
| ➤ Synthesis of $\delta$ -ketoamides.....                                                        | S12     |
| E. Mechanistic studies.....                                                                     | S13-S17 |
| i) Radical scavenging experiment with 2,2,6,6-tetramethyl-1-piperidinyloxy radical (TEMPO)..... | S13     |
| ii) Radical scavenging experiment with 1,1-diphenylethylene.....                                | S13     |
| iii) Divided cell experiment.....                                                               | S14     |
| iv) Time-based electrolysis.....                                                                | S14     |
| v) Electrolysis in deuterated solvent ( $\text{CD}_3\text{CN}$ ).....                           | S15     |
| vi) Electrolysis in $\text{H}_2\text{O}/\text{D}_2\text{O}$ .....                               | S15     |
| vii) Electrolysis of $\delta$ -hydroxy benzamide.....                                           | S16     |
| viii) NMR studies.....                                                                          | S16     |
| ix) Cyclic voltammetry (CV) studies.....                                                        | S17     |
| F. Synthetic applications.....                                                                  | S18-S21 |
| a) General procedure for the electrochemical gram-scale synthesis.....                          | S18     |
| ➤ Synthesis of $\delta$ -substituted amides.....                                                | S18     |
| ➤ Synthesis of $\delta$ -ketoamides.....                                                        | S18     |
| b) Procedure for the electrochemical scaffold hopping.....                                      | S19     |
| c) Reduction of the keto-group in $\delta$ -ketoamides.....                                     | S19     |
| d) $\text{S}_\text{N}\text{Ar}$ reaction of $\delta$ -hydroxybenzamide.....                     | S19     |
| e) Synthesis of diacyl primary amine derivative.....                                            | S20     |
| f) Synthesis of an amidine derivative.....                                                      | S20     |

|                                                                    |         |
|--------------------------------------------------------------------|---------|
| g) Synthesis of a thioamide derivative.....                        | S20     |
| h) $\alpha$ -Bromination of $\delta$ -ketoamide.....               | S21     |
| G. Single-crystal X-Ray data for compound 2p.....                  | S21-S23 |
| H. Calculations of green chemistry metrics.....                    | S24     |
| I. Calculations of faradaic efficiency.....                        | S25     |
| J. Characterization data of final compounds.....                   | S26-S39 |
| K. Copies of NMR spectra of compounds and HRMS of intermediates... | S39-S85 |
| L. References.....                                                 | S86     |

## A. General Information

Unless noted otherwise, all reagents and solvents were purchased from commercial sources and used as received. All reactions were performed in oven-dried round-bottom flasks. Electrochemical reactions were performed at room temperature using a DC power supply of Keysight Technologies (25 V, 5A) and GW INSTEK GPP-4323 (32 V, 3A). Electrodes were commercially available from IKA. Cyclic voltammetry analysis was carried out in CH instrument electrochemical analyzer (CHI1210C). The developed chromatogram was analyzed by UV lamp (254 nm) or p-anisaldehyde solution. Column chromatography was performed on silica gel mesh size 230-400. The proton ( $^1\text{H}$ ) and carbon  $^{13}\text{C}\{^1\text{H}\}$  and  $^{19}\text{F}$  NMR spectra were recorded in a 400 MHz JEOL JNM ECS400 spectrometer in the  $\text{CDCl}_3$  solvent (unless otherwise mentioned) and are reported in  $\delta$  units. Chemical shifts of NMR spectra are expressed in parts per million (ppm). Coupling constants ( $J$  values) are reported in Hz. High-resolution mass spectra (HRMS) were obtained using the electron spray ionization (ESI) technique and a TOF mass analyzer. Yields refer to isolated compounds. The description of the signals includes the following: s = singlet, d = doublet, dd = doublet of doublet, ddd = doublet of doublet of doublets, ddt = doublet of doublet of Triplets, dtd = doublet of triplet of doublets, tdd = triplet of doublet of doublets, t = triplet, dt = doublet of triplet, q = quartet, br = broad, and m = multiplet.

## B. Preparation of the starting materials<sup>1-6</sup>

### 1. The synthesis of substrate 1a<sup>1</sup>

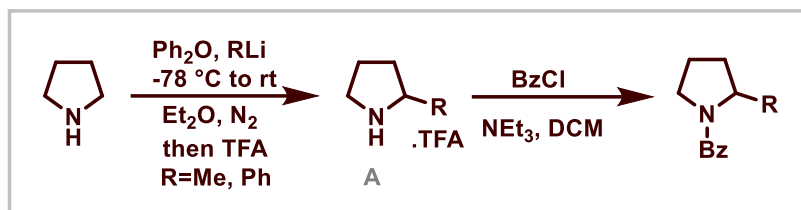

C2 substituted pyrrolidine TFA salt (A) was synthesized according to the reported procedure.<sup>2</sup> To a solution of pyrrolidine (821  $\mu$ L, 10 mmol, 1.0 equiv) and benzophenone (2.19 g, 12 mmol, 1.2 equiv) in Et<sub>2</sub>O (20 mL, 0.50 M) was added RLi (1.0 M in Et<sub>2</sub>O, 25 mL, 25 mmol, 2.5 equiv) dropwise at -78 °C under an atmosphere of N<sub>2</sub>. After being stirred at the same temperature for 10 min, the reaction mixture was allowed to warm to room temperature and stirred for 7 h. The reaction was quenched with MeOH at 0 °C, and the mixture was diluted with water and extracted with 6.0 M HCl aq. (pH = 1). The aqueous layer was basified to pH = 13 with 6.0 M NaOH aq. The mixture was extracted three times with CH<sub>2</sub>Cl<sub>2</sub>. The combined organic layer was acidified to pH = 1 with TFA, dried over Na<sub>2</sub>SO<sub>4</sub>, filtered, and concentrated *in vacuo*. The crude product was used for the next step without further purification. To a solution of the crude product obtained above (1.0 equiv) and Et<sub>3</sub>N (3.0 equiv) in CH<sub>2</sub>Cl<sub>2</sub> (25 mL, 0.40 M) was added BzCl (1.2 equiv), Ac<sub>2</sub>O (1.5 equiv), or TFAA (1.5 equiv) dropwise at 0 °C. The reaction mixture was allowed to warm to room temperature and stirred for 1 h, which was then quenched with a saturated NaHCO<sub>3</sub> aqueous solution and extracted three times with CH<sub>2</sub>Cl<sub>2</sub>. The combined organic layer was dried over Na<sub>2</sub>SO<sub>4</sub>, filtered, and concentrated *in vacuo*. The residue was purified by silica gel column chromatography (10-20% EtOAc in Hexane) to afford N-acyl pyrrolidine **1a**.

### 2. The synthesis of substrates 1b-1c and 6<sup>1</sup>

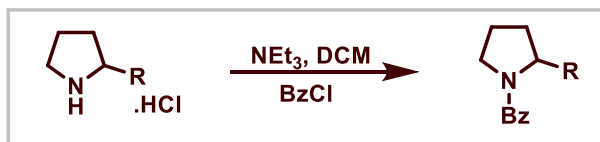

To a solution of pyrrolidine salt (1.0 equiv) and Et<sub>3</sub>N (3.0 equiv-4.0 equiv) in CH<sub>2</sub>Cl<sub>2</sub> (0.40 M) was added benzoyl chloride (1.2 equiv) dropwise at 0 °C. The reaction mixture was allowed to warm to room temperature and stirred for 30 min, which was then quenched with a saturated NaHCO<sub>3</sub> aqueous solution. The mixture was extracted three times with CH<sub>2</sub>Cl<sub>2</sub>. The combined organic layer was dried over Na<sub>2</sub>SO<sub>4</sub>, filtered, and concentrated *in vacuo*. The residue was purified by silica gel column chromatography (10-20% EtOAc in Hexane) to afford pyrrolidine **1b-1c**.

### 3. The synthesis of substrate 1d<sup>1</sup>

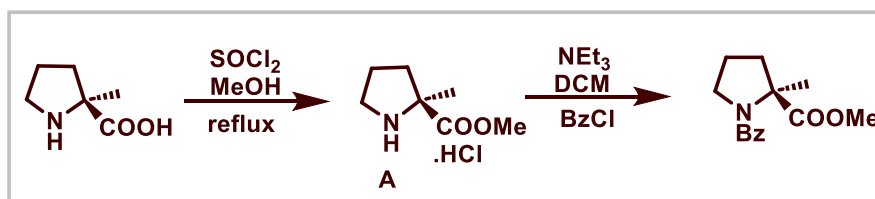

To a solution of pyrrolidine (2.0 mmol, 1.0 equiv) in MeOH (4.0 mL, 0.50 M) was added thionyl chloride (4.0 mmol, 2.0 equiv) dropwise at 0 °C. The reaction mixture was refluxed for 3 h. After the reaction mixture had been cooled to room temperature, the mixture was concentrated *in vacuo*. The crude product was used for the next step without further purification.

To a solution of the crude product obtained above (1.0 equiv) and Et<sub>3</sub>N (836 μL, 6.0 mmol, 3.0 equiv) in CH<sub>2</sub>Cl<sub>2</sub> (5.0 mL, 0.40 M) was added BzCl (279 μL, 2.4 mmol, 1.2 equiv) dropwise at 0 °C. After the mixture was allowed to warm to room temperature and stirred for 1 h, the reaction was quenched with a saturated NaHCO<sub>3</sub> aqueous solution. The mixture was extracted three times with CH<sub>2</sub>Cl<sub>2</sub>. The combined organic layer was concentrated *in vacuo*. The residue was purified by silica gel column chromatography (30-40% EtOAc in Hexane) to afford pyrrolidine **1d**.

#### 4. The synthesis of substrate **1e**<sup>1-3</sup>

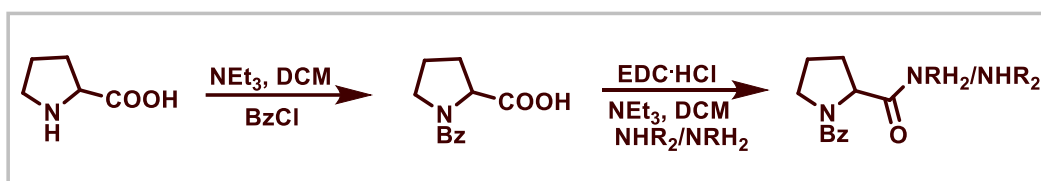

To a solution of proline (1.0 equiv) and Et<sub>3</sub>N (3.0 equiv) in CH<sub>2</sub>Cl<sub>2</sub> (0.50 M) was added BzCl (1.2 equiv) dropwise and stirred at room temperature for 30 min, which was then quenched with water. The mixture was extracted with 6.0 M NaOH aq. The aqueous layer was acidified to pH = 1 with 6.0 M HCl aq. The mixture was extracted three times with CH<sub>2</sub>Cl<sub>2</sub>. The combined organic layer was concentrated *in vacuo*. The crude product was used for the next step without further purification.

To a solution of the crude product obtained above (1.0 equiv) in CH<sub>2</sub>Cl<sub>2</sub> (0.50 M) was added EDC·HCl (1.2 equiv). After the mixture had been stirred at room temperature for 30 min, to this mixture were added Et<sub>3</sub>N (1.5 equiv) and amine (1.2 equiv). The solution was stirred for several hours while the reaction progress was being monitored by TLC. After the starting material had been completely consumed, the reaction was quenched with water. The mixture was extracted three times with CH<sub>2</sub>Cl<sub>2</sub>. The combined organic layer was concentrated *in vacuo*. The residue was purified by silica gel column chromatography (50% EtOAc in Hexane) to afford pyrrolidine **1e**.

#### 5. The synthesis of substrate **1f**<sup>1</sup>

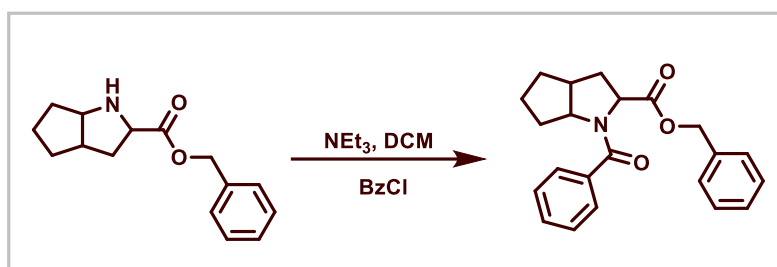

To a solution of pyrrolidine (1.0 equiv) and Et<sub>3</sub>N (3.0 equiv-4.0 equiv) in CH<sub>2</sub>Cl<sub>2</sub> (0.40 M) was added benzoyl chloride (1.2 equiv) dropwise at 0 °C. The reaction mixture was allowed to warm to room temperature and stirred for 30 min, which was then quenched with a saturated NaHCO<sub>3</sub> aqueous solution. The mixture was extracted three times with CH<sub>2</sub>Cl<sub>2</sub>. The combined organic layer was dried over Na<sub>2</sub>SO<sub>4</sub>, filtered, and concentrated *in vacuo*. The residue was purified by silica gel column chromatography (10-20% EtOAc in Hexane) to afford pyrrolidine **1f**.

## 6. The synthesis of substrates **1g-1h**<sup>1-2</sup>

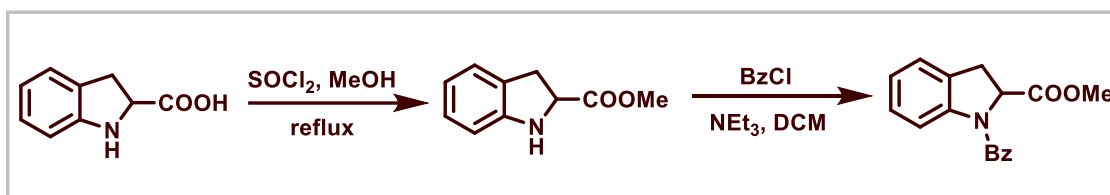

To a solution of indoline-2-carboxylic acid (1.5 mmol, 1.0 equiv) in  $\text{MeOH}$  (3.0 mL, 0.50 M) was added  $\text{SOCl}_2$  (3.0 mmol, 2.0 equiv). After being heated at  $70\text{ }^\circ\text{C}$  for 3 h, the reaction mixture was concentrated *in vacuo*. To the residue were added  $\text{CH}_2\text{Cl}_2$  (5.0 mL, 0.40 M),  $\text{Et}_3\text{N}$  (1.1 mL, 8.0 mmol, 4.0 equiv), and  $\text{BzCl}$  (3.0 mmol, 1.5 equiv). After being stirred for 2 h, the reaction was quenched with a saturated  $\text{NaHCO}_3$  aq. The mixture was extracted three times with  $\text{CH}_2\text{Cl}_2$ . The combined organic layer was dried over  $\text{Na}_2\text{SO}_4$ , filtered, and concentrated *in vacuo*. The residue was purified by silica gel column chromatography (30%  $\text{EtOAc}$  in Hexane) to afford **1g-1h**.

## 7. The synthesis of substrates **1i-1l**<sup>1-5</sup>

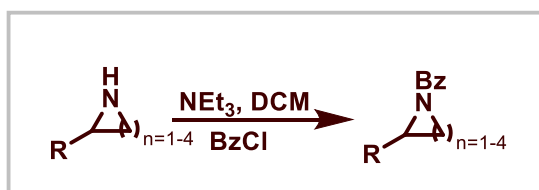

To a solution of pyrrolidine (1.0 equiv) and  $\text{Et}_3\text{N}$  (3.0 equiv-4.0 equiv) in  $\text{CH}_2\text{Cl}_2$  (0.40 M) was added benzoyl chloride (1.2 equiv) dropwise at  $0\text{ }^\circ\text{C}$ . The reaction mixture was allowed to warm to room temperature and stirred for 30 min, which was then quenched with a saturated  $\text{NaHCO}_3$  aqueous solution. The mixture was extracted three times with  $\text{CH}_2\text{Cl}_2$ . The combined organic layer was dried over  $\text{Na}_2\text{SO}_4$ , filtered, and concentrated *in vacuo*. The residue was purified by silica gel column chromatography (10-20%  $\text{EtOAc}$  in Hexane) to afford pyrrolidine **1i-1l**.

## 8. The synthesis of substrates **1aa-1af**<sup>1-3</sup>

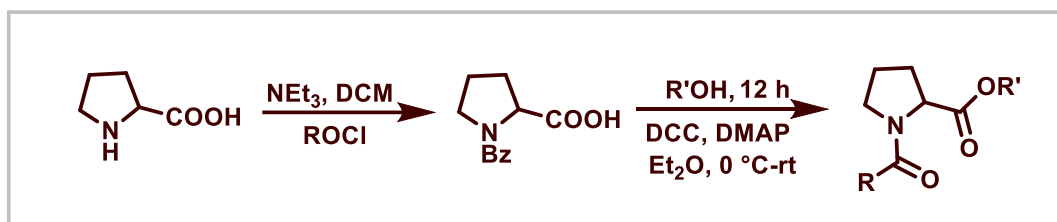

First, the proline was protected with a benzoyl group, following the reported procedure.<sup>1-3</sup> Then, DCC (6 mmol, 2 equiv) was added portion-wise to the alcohol (3 mmol, 1 equiv), proline derivative (4.5 mmol, 1.5 equiv), and DMAP (0.6 mmol, 20 mol%) in  $\text{Et}_2\text{O}$  (14 mL) at  $0\text{ }^\circ\text{C}$ . Once added, the reaction was stirred at room temperature. After completion, the mixture was filtered and washed with  $\text{Et}_2\text{O}$ . The

filtrate was evaporated, and the residue was purified by silica gel column chromatography (40-50% EtOAc in Hexane) to afford the desired products **1aa-1af**.

## 9. The synthesis of substrates **1m-1r** and **3a-3i**<sup>1</sup>

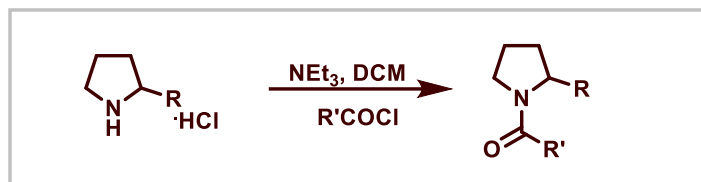

To a solution of pyrrolidine (1.0 equiv) in  $\text{CH}_2\text{Cl}_2$  (0.40 M) were added  $\text{Et}_3\text{N}$  (3 equiv) and acyl chloride (1.2 equiv) at  $0^\circ\text{C}$ . The reaction was allowed to warm to room temperature and stirred for 8 h. The reaction was quenched with water and extracted three times with  $\text{CH}_2\text{Cl}_2$ . The combined organic layer was dried over  $\text{Na}_2\text{SO}_4$ , filtered, and concentrated *in vacuo*. The residue was purified by silica gel column chromatography (20-30% EtOAc in Hexane) to afford pyrrolidine **1m-1r** and **3a-3i**.

## 10. The synthesis of substrate **5**<sup>1</sup>

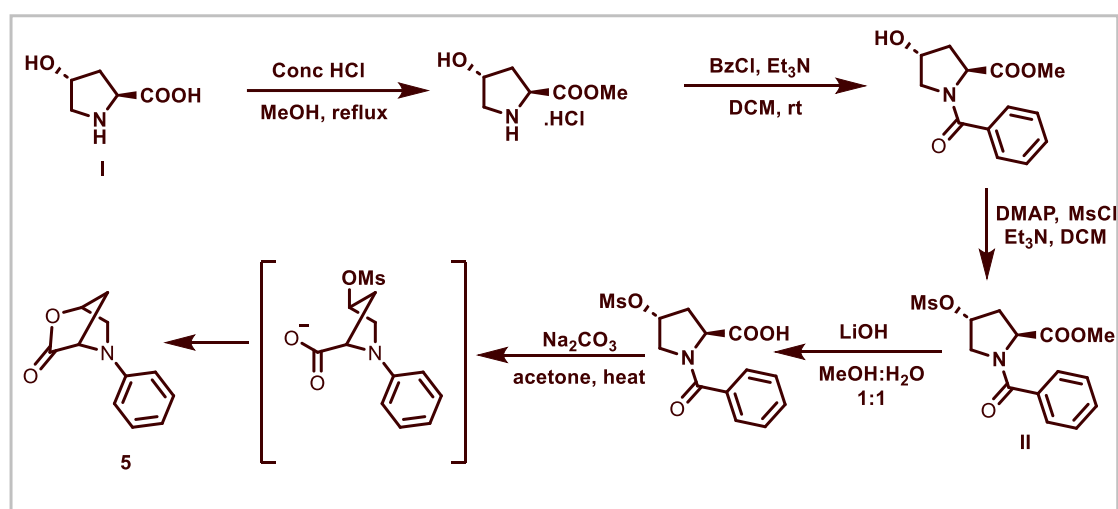

Firstly, **II** is synthesised by using the reported procedure.<sup>1</sup> To a solution of **II** (1.7 mmol, 1.0 equiv) in  $\text{MeOH}/\text{H}_2\text{O}$  (3.3 mL/3.3 mL, 0.25 M) was added lithium hydroxide anhydrous (5.0 mmol, 3.0 equiv). After being stirred at room temperature for 5 min, the reaction was quenched with a 3.0 M  $\text{HCl}$  aq. (pH = 1) and extracted three times with  $\text{CH}_2\text{Cl}_2$ . The combined organic layer was dried over  $\text{Na}_2\text{SO}_4$ , filtered, and concentrated *in vacuo*. The crude product was used for the next step without further purification. To a solution of the crude product obtained above in acetone (0.10 M) was added sodium carbonate (1.22 mmol, 1.5 equiv). The mixture was stirred at  $60^\circ\text{C}$  for 7 h while the reaction progress was being monitored by TLC. The solvent was removed under reduced pressure. The residue was diluted with water and extracted three times with EtOAc. The combined organic layer was dried over  $\text{Na}_2\text{SO}_4$ , filtered, and concentrated *in vacuo*. The residue was purified by silica gel column chromatography (50% EtOAc in hexane) to afford **5** as a white solid.

## C. General setup and procedure for electrochemical reaction

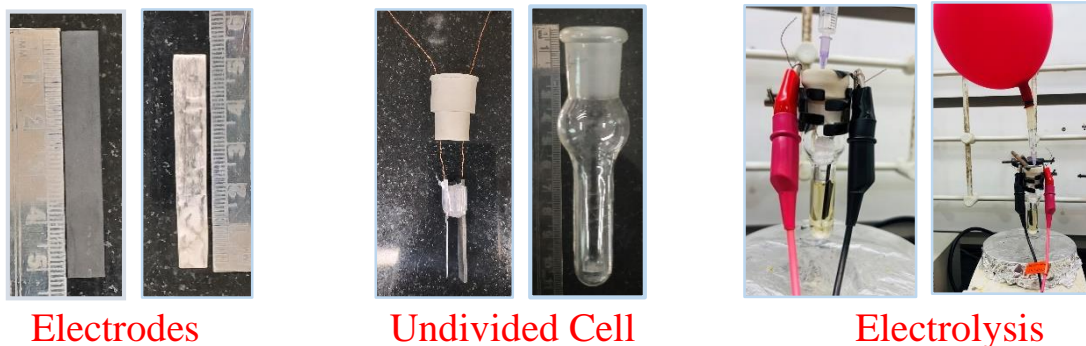

Figure: A

### ➤ Synthesis of $\delta$ -substituted amides

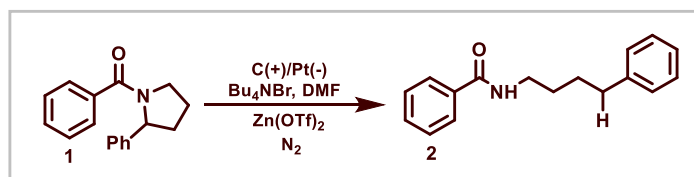

To an undivided cell equipped with a magnetic stirring bar and graphite as anode and platinum as cathode, having dimensions (W×H×D) 8×52.5×2 mm, were added pyrrolidine **1** (0.15 mmol, 1.0 equiv), Bu<sub>4</sub>NBr (0.15 mmol), and zinc trifluoromethanesulfonate (Zn(OTf)<sub>2</sub>: 10 mol%). After being sealed with a septum, the vial was evacuated and backfilled three times with N<sub>2</sub> gas. To this vial were added DMF (3.0 mL). After being electrolyzed at a constant current of 10 mA at room temperature for 12 h, the reaction mixture was diluted with water and extracted three times with EtOAc. The combined organic layer was concentrated *in vacuo*, and the residue was purified to afford the corresponding product **2**.

### ➤ Synthesis of $\delta$ -ketoamides

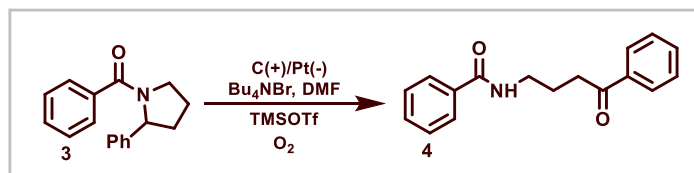

To an undivided cell equipped with a magnetic stirring bar and graphite as anode and platinum as cathode, having dimensions (W×H×D) 8×52.5×2 mm, were added pyrrolidine **3** (0.15 mmol, 1.0 equiv), and Bu<sub>4</sub>NBr (0.15 mmol). After being sealed with a septum, the vial was evacuated and backfilled three times with O<sub>2</sub> gas. To the vial were added 3.0 mL of DMF and trimethylsilyl trifluoromethanesulfonate (TMSOTf: 10 mol%); the vial was kept under a continuous oxygen atmosphere using a balloon. Being electrolyzed at a constant current of 20 mA at room temperature for 12 h, the reaction mixture was

diluted with water and extracted three times with EtOAc. The combined organic layer was concentrated *in vacuo*, and the residue was purified to afford the corresponding product **4**.

## D. Optimization studies

### a. Synthesis of $\delta$ -substituted amides

To an undivided cell equipped with a magnetic stirring bar and electrodes (anode & cathode) were added pyrrolidine **1p** (0.15 mmol, 1.0 equiv), electrolyte (0.15 mmol), and Lewis acid (10 mol%). After being sealed with a plastic septum, the cell was evacuated and backfilled three times with N<sub>2</sub> gas. To this vial, DMF (3 mL) was added. After being electrolyzed at a constant current of 10 mA at room temperature for 12 h, the reaction mixture was diluted with water and extracted three times with EtOAc. The combined organic layer was concentrated *in vacuo*, and the residue was purified to afford the corresponding product **2**.

#### I. Lewis acid

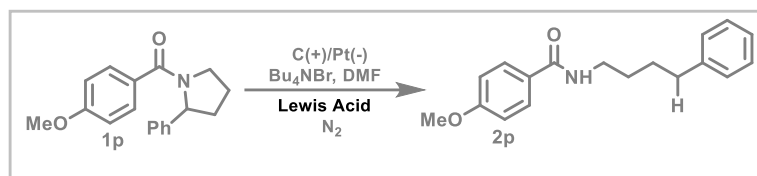

| S.No. | Lewis Acid                         | Yield of 2p (%) |
|-------|------------------------------------|-----------------|
| 1     | none                               | n.r.            |
| 2     | Cu(OTf) <sub>2</sub>               | n.r.            |
| 3     | TMSOTf                             | 40              |
| 4     | BF <sub>3</sub> ·Et <sub>2</sub> O | trace           |
| 5     | Sc(OTf) <sub>3</sub>               | 20              |
| 6     | Sn(OTf) <sub>2</sub>               | n.r.            |
| 7     | TMSCl                              | n.r.            |

#### II. Electrolyte

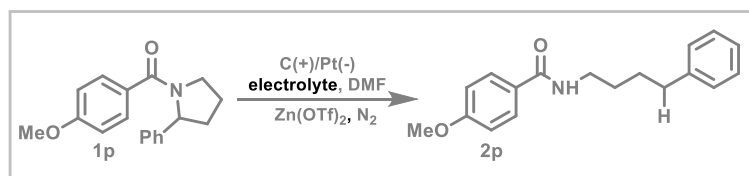

| S.No. | Electrolyte          | Yield of 2p (%)       |
|-------|----------------------|-----------------------|
| 1     | none                 | n.r.(High resistance) |
| 2     | Bu <sub>4</sub> NI   | 30                    |
| 3     | Bu <sub>4</sub> NOTf | n.r.                  |
| 4     | Bu <sub>4</sub> NOAc | n.r.                  |

|   |                                  |       |
|---|----------------------------------|-------|
| 5 | Bu <sub>4</sub> NBF <sub>4</sub> | trace |
| 6 | LiClO <sub>4</sub>               | n.r.  |

### III. Solvent

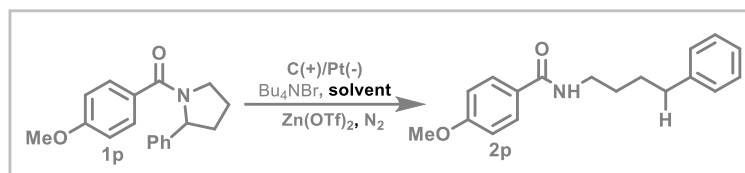

| S.No. | Solvent | Yield of 2p (%) |
|-------|---------|-----------------|
| 1     | DMA     | 70              |
| 2     | DCE     | n.r.            |
| 3     | DMSO    | 40              |
| 4     | ACN     | 55              |
| 5     | DCM     | n.r.            |
| 6     | THF     | n.r.            |

### IV. Electrode

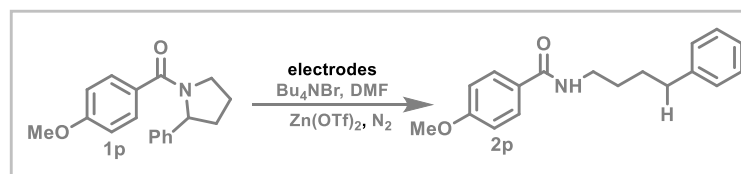

| S.No. | Electrode   | Yield of 2p (%) |
|-------|-------------|-----------------|
| 1     | C(+)/C(-)   | 10              |
| 2     | Al(+)/Pt(-) | 60              |
| 3     | Zn(+)/Pt(-) | 42              |
| 4     | Pt(+)/Pt(-) | 15              |
| 5     | C(+)/Ni(-)  | 40              |
| 6     | Mg(+)/Pt(-) | n.r.            |

## b. Synthesis of $\delta$ -ketoamides

To an undivided cell equipped with a magnetic stirring bar and electrodes (anode & cathode) were added pyrrolidine **3g** (0.15 mmol, 1.0 equiv), electrolyte (0.15 mmol), and Lewis acid (10 mol%). After being sealed with a plastic septum, the cell was evacuated and backfilled three times with O<sub>2</sub> gas. After adding 3.0 mL of DMF, the vial was kept under a continuous oxygen atmosphere using a balloon. After being electrolyzed at a constant current of 20 mA at room temperature for 12 h, the reaction mixture was diluted with water and extracted three times with EtOAc. The combined organic layer was concentrated *in vacuo*, and the residue was purified to afford the corresponding product **4g**.

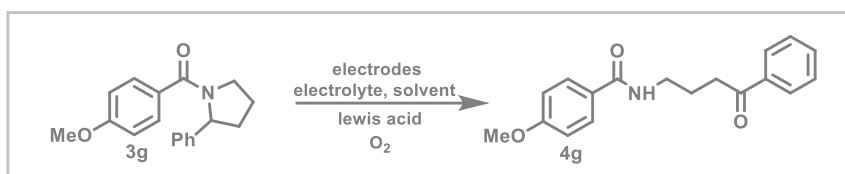

**Table:1**

| Entry <sup>a</sup> | Electrode         | Supporting Electrolyte           | Solvent    | Lewis Acid           | Yield(%) <sup>[b]</sup> |
|--------------------|-------------------|----------------------------------|------------|----------------------|-------------------------|
| 1                  | C(+)/Pt(-)        | Bu <sub>4</sub> NBF <sub>4</sub> | DMF        | Zn(OTf) <sub>2</sub> | 10                      |
| 2                  | C(+)/Ni(-)        | Bu <sub>4</sub> NBF <sub>4</sub> | DMF        | Zn(OTf) <sub>2</sub> | trace                   |
| 3                  | Pt(+)/Pt(-)       | Bu <sub>4</sub> NBF <sub>4</sub> | DMF        | Zn(OTf) <sub>2</sub> | n.r.                    |
| 4                  | C(+)/Pt(-)        | Bu <sub>4</sub> NBr              | DMF        | Zn(OTf) <sub>2</sub> | 15                      |
| 5                  | C(+)/Pt(-)        | Bu <sub>4</sub> NI               | DMF        | Zn(OTf) <sub>2</sub> | n.r.                    |
| 6                  | C(+)/Pt(-)        | Bu <sub>4</sub> NBr              | DMF        | Sc(OTf) <sub>3</sub> | n.r.                    |
| 7                  | C(+)/Pt(-)        | Bu <sub>4</sub> NBr              | DMF        | TMSCl                | 30                      |
| <b>8</b>           | <b>C(+)/Pt(-)</b> | <b>Bu<sub>4</sub>NBr</b>         | <b>DMF</b> | <b>TMSOTf</b>        | <b>75</b>               |
| 9                  | C(+)/Pt(-)        | Bu <sub>4</sub> NBr              | ACN        | TMSOTf               | 20                      |
| 10 <sup>[c]</sup>  | C(+)/Pt(-)        | Bu <sub>4</sub> NBr              | DMF        | TMSOTf               | 50                      |
| 11 <sup>[d]</sup>  | C(+)/Pt(-)        | Bu <sub>4</sub> NBr              | DMF        | TMSOTf               | 68                      |
| 12 <sup>[e]</sup>  | C(+)/Pt(-)        | Bu <sub>4</sub> NBr              | DMF        | TMSOTf               | 25                      |
| 13 <sup>[f]</sup>  | C(+)/Pt(-)        | Bu <sub>4</sub> NBr              | DMF        | TMSOTf               | n.r.                    |

<sup>[a]</sup> Reaction conditions: **3g** (0.15), electrolyte (0.15 mmol), solvent (3 mL), Lewis acid (10 mol%), 20 mA constant current, graphite anode and platinum cathode, dimensions (W×H×D) 8×52.5×2 mm, the distance between two electrodes is 5 mm and dipped 20 mm in solution, undivided cell, 25 °C, under constant pressure of oxygen balloon. <sup>[b]</sup> Isolated yield, n.r. = no

reaction. <sup>[c]</sup> 10 mA current instead of 20 mA. <sup>[d]</sup> 25 mA current instead of 20 mA. <sup>[e]</sup> In the open air atmosphere. <sup>[f]</sup> In the absence of electricity.

## E. Mechanistic studies

### i) Radical scavenging experiment with 2,2,6,6-tetramethyl-1-piperidinyloxy radical (TEMPO)

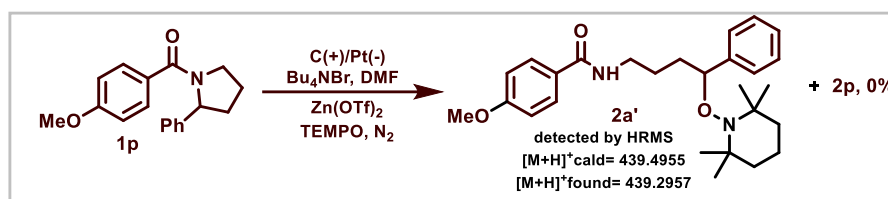

To an undivided cell equipped with a magnetic stirring bar and graphite as anode and platinum as cathode, pyrrolidine **1p** (0.15 mmol, 1.0 equiv), Bu<sub>4</sub>NBr (0.15 mmol), and zinc trifluoromethanesulfonate (Zn(OTf)<sub>2</sub>: 10 mol%) and TEMPO (2.0 equiv). After being sealed with a septum, the vial was evacuated and backfilled three times with N<sub>2</sub> gas. To this vial were added DMF (3.0 mL). After being electrolyzed at a constant current of 10 mA at room temperature for up to 18 h, the progress of the reaction was monitored by TLC, which shows that the starting material was consumed and a complex reaction mixture was observed. The TEMPO adduct was detected by HRMS analysis, which confirms that the reaction follows a radical pathway.

### ii) Radical scavenging experiment with 1,1-diphenylethylene

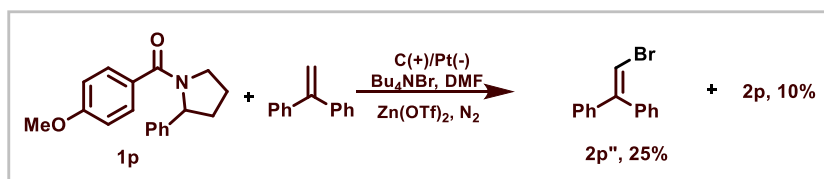

To an undivided cell equipped with a magnetic stirring bar and graphite as anode and platinum as cathode, pyrrolidine **1p** (0.15 mmol, 1.0 equiv), Bu<sub>4</sub>NBr (0.15 mmol), and zinc trifluoromethanesulfonate (Zn(OTf)<sub>2</sub>: 10 mol%) and 1,1-diphenylethylene (1.0 equiv). After being sealed with a septum, the vial was evacuated and backfilled three times with N<sub>2</sub> gas. To this vial were added DMF (3.0 mL). After being electrolyzed at a constant current of 10 mA at room temperature the progress of the reaction was monitored by TLC. After 6h of reaction time, the starting material was consumed. Further, the reaction mixture was purified through column chromatography, 10% desired product **2p** and 25% of the (2-bromoethene-1,1-diyl)dibenzene **2p''** was obtained.

### iii) Divided cell experiment

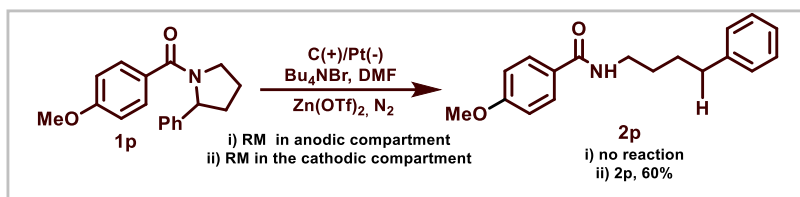

**Case 1:** In anodic chamber: A divided cell was equipped with two magnetic stir bars in the anodic and cathodic chambers, respectively. Further, the anodic chamber was filled with corresponding pyrrolidine **1p** (1.0 equiv, 0.15 mmol),  $\text{Bu}_4\text{NBr}$  (3.0 equiv., 0.45 mmol), and  $\text{Zn}(\text{OTf})_2$  (10 mol%) in DMF solvent under a nitrogen atmosphere. The cathodic chamber was filled only with supporting electrolyte  $\text{Bu}_4\text{NBr}$  (3.0 equiv, 0.45 mmol), and the solution was electrolyzed with a carbon anode (in the anodic chamber) and a platinum cathode (in the cathodic chamber) at a constant current of 10 mA for 24 h at room temperature (25-30 °C). The progress of the reaction was monitored by TLC, which showed the starting material remains unconsumed.

**Case 2:** In the cathodic chamber, a divided cell was equipped with two magnetic stir bars in the anodic and cathodic chambers, respectively. Further, the cathodic chamber was filled with corresponding pyrrolidine **1p** (1.0 equiv, 0.15 mmol),  $\text{Bu}_4\text{NBr}$  (3.0 equiv, 0.45 mmol), and  $\text{Zn}(\text{OTf})_2$  (10 mol%) in DMF solvent under a nitrogen atmosphere. The anodic chamber was filled with supporting electrolyte  $\text{Bu}_4\text{NBr}$  (3.0 equiv, 0.45 mmol), and the solution was electrolyzed with a carbon anode (in the anodic chamber) and a platinum cathode (in the cathodic chamber) at a constant current of 10 mA for 15 h at room temperature. The progress of the reaction was monitored by TLC. After total consumption of pyrrolidine, the reaction mixture was diluted with water and extracted three times with EtOAc. The combined organic layer was concentrated *in vacuo*, and the residue was purified to afford the corresponding product **2p** in a slightly lower yield, i.e., 60%. This implies that the reaction takes place by the cathodic reduction.

### iv) Time-based electrolysis

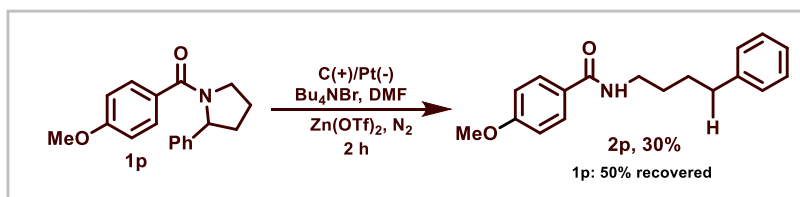

To an undivided cell equipped with a magnetic stirring bar and graphite as anode and platinum as cathode, pyrrolidine **1p** (0.15 mmol, 1.0 equiv),  $\text{Bu}_4\text{NBr}$  (0.15 mmol), and zinc trifluoromethanesulfonate ( $\text{Zn}(\text{OTf})_2$ : 10 mol%). After being sealed with a septum, the vial was evacuated and backfilled three times with  $\text{N}_2$  gas. To this vial was added DMF (3.0 mL). Reaction was electrolyzed at a constant current of 10 mA at room temperature for up to 2 h, the progress of the reaction was monitored by TLC, which shows that starting material remains with small amount of product formation. After, that the reaction was stirred overnight without electricity. Again, the progress of the reaction was monitored by TLC, similar TLC was observed. Further, the reaction mixture was purified through column chromatography, 30% desired product **2p** and approx. 50% of the starting material **1p** was recovered. This indicates that the chain propagation step is absent in this case.

v) **Electrolysis in deuterated solvent (CD<sub>3</sub>CN)**

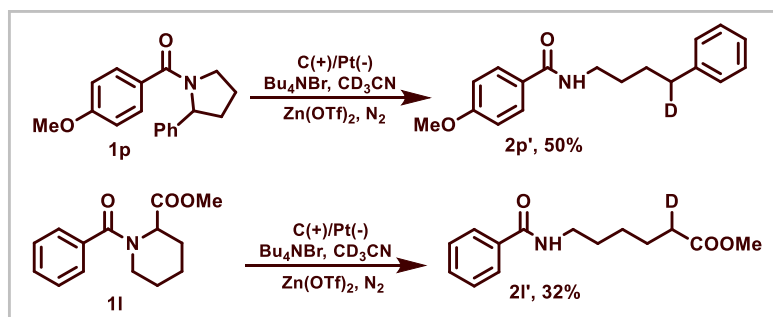

To an undivided cell equipped with a magnetic stirring bar and graphite as anode and platinum as cathode, **1** (0.15 mmol, 1.0 equiv), Bu<sub>4</sub>NBr (0.15 mmol), and zinc trifluoromethanesulfonate (Zn(OTf)<sub>2</sub>: 10 mol%). After being sealed with a septum, the vial was evacuated and backfilled three times with N<sub>2</sub> gas. To this vial were added CD<sub>3</sub>CN (3.0 mL). After being electrolyzed at a constant current of 10 mA at room temperature for 12 h, the reaction mixture was diluted with water and extracted three times with EtOAc. The combined organic layer was concentrated *in vacuo*, and the residue was purified to afford the corresponding product **2**.

vi) **Electrolysis in H<sub>2</sub>O/D<sub>2</sub>O**

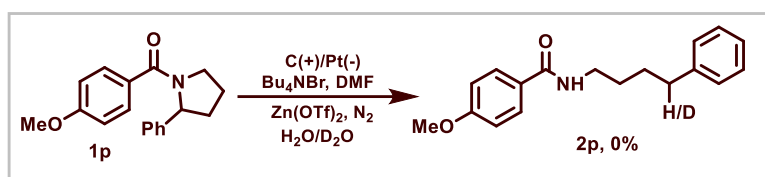

To an undivided cell equipped with a magnetic stirring bar and graphite as anode and platinum as cathode, pyrrolidine **1p** (0.15 mmol, 1.0 equiv), Bu<sub>4</sub>NBr (0.15 mmol), and zinc trifluoromethanesulfonate (Zn(OTf)<sub>2</sub>: 10 mol%). After being sealed with a septum, the vial was evacuated and backfilled three times with N<sub>2</sub> gas. To this vial were added DMF (3.0 mL) and H<sub>2</sub>O/D<sub>2</sub>O (equiv). After being electrolyzed at a constant current of 10 mA at room temperature for 12 h.

**Table: 2**

| S.No. | H <sub>2</sub> O (equiv.) | Yield 2p (%)    |
|-------|---------------------------|-----------------|
| 1     | 1                         | complex mixture |
| 2     | 5                         | no reaction     |
| 3     | 10                        | no reaction     |

**Table: 3**

| S.No. | D <sub>2</sub> O (equiv.) | Yield 2p (%) |
|-------|---------------------------|--------------|
| 1     | 1                         | no reaction  |
| 2     | 5                         | no reaction  |
| 3     | 10                        | no reaction  |

## vii) Electrolysis of $\delta$ -Hydroxy benzamide

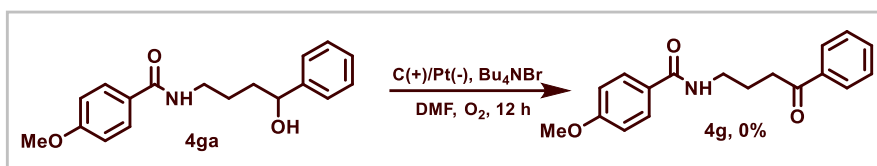

To an undivided cell equipped with a magnetic stirring bar and graphite as anode and platinum as cathode,  $\delta$ -hydroxy benzamide **4ga** (0.15 mmol, 1.0 equiv),  $\text{Bu}_4\text{NBr}$  (0.15 mmol). After being sealed with a septum, the vial was evacuated and backfilled three times with  $\text{O}_2$  gas. To this vial were added DMF (3.0 mL). After being electrolyzed at a constant current of 20 mA at room temperature for 12 h under oxygen atmosphere, the starting material **4ga** remains unconsumed as no desired product formed which excludes the possibility of its intermediacy or the participation of water in formation of  $\delta$ -ketobenzamide **4g**.

## viii) NMR studies

$^{13}\text{C}\{^1\text{H}\}$  NMR spectra of *N*-acyl pyrrolidines **1c** (0.20 mmol for (*N*-COPh), in the presence of  $\text{Zn}(\text{OTf})_2$  (0 mol%, 5 mol%, and 30 mol%) were measured in  $\text{CDCl}_3$  (0.6 mL).

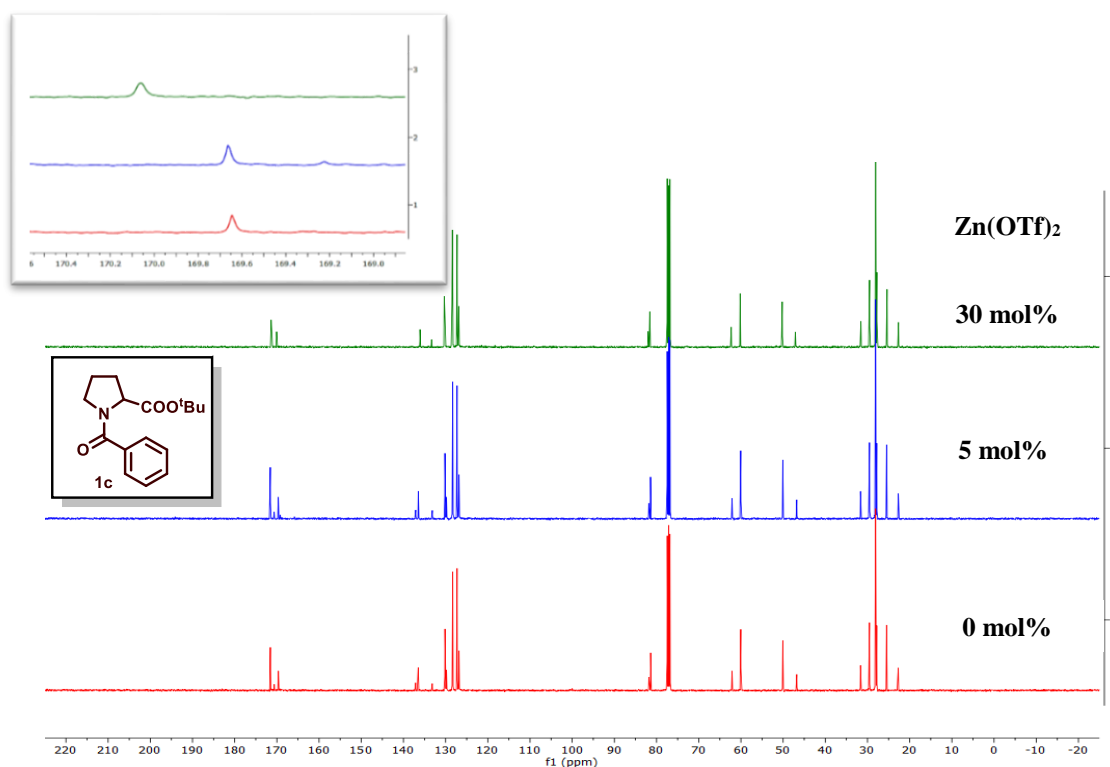

## ix) Cyclic Voltammetry (CV) studies

Cyclic voltammetry analysis was performed using a CH Instrument electrochemical analyzer (CHI1210C). Samples were prepared in a 10 ml vial with 0.01 M of substrate (**1p**), and 0.1 M of tetrabutylammonium tetrafluoroborate ( $\text{Bu}_4\text{NBF}_4$ ) in 6 mL dry acetonitrile ( $\text{CH}_3\text{CN}$ ). All the cyclic voltammetry investigations were carried out using a three-electrode cell consisting of a glassy carbon working electrode (Disk electrode), a platinum wire (Pt) counter electrode, and a silver wire (Ag) as a pseudo-reference electrode, and ferrocene ( $\text{Fc}/\text{Fc}^+$ ) as a reference or internal standard. The surface area of glassy carbon is 7.06 sq. mm. The working electrode was polished with 0.05  $\mu\text{m}$  alumina slurry on a polishing pad and rinsed with deionized water before use. All the solutions used for the voltammetric experiments were deoxygenated by purging with high-purity argon gas (unless mentioned) for up to 5 minutes, and measurements were performed at room temperature. The scan rate applied was 50 mV/s, ranging from 0 V to -3V. CV experiment was measured in the negative or reductive direction. Graphs were plotted using the IUPAC convention.

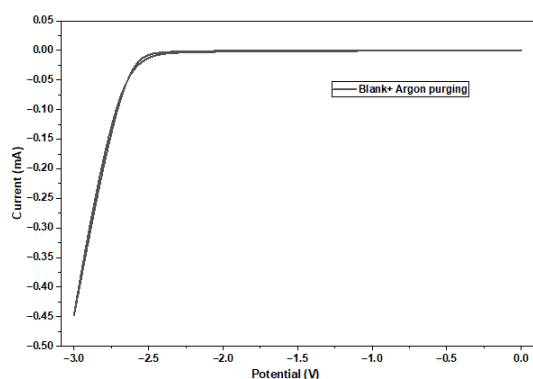

Figure 1:  $\text{Bu}_4\text{NBF}_4$  (0.06 mmol) + ACN (6 mL) + Argon purging

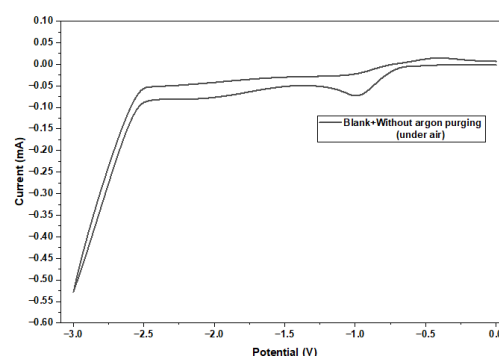

Figure 2:  $\text{Bu}_4\text{NBF}_4$  (0.06 mmol) + ACN (6 mL) + without argon purging (open air)

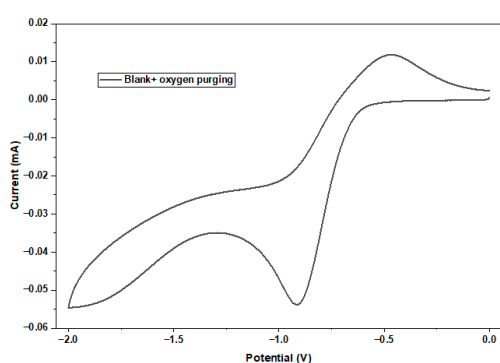

Figure 3:  $\text{Bu}_4\text{NBF}_4$  (0.06 mmol) + ACN (6 mL) + Oxygen purging

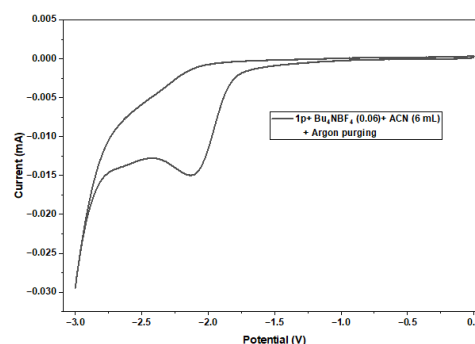

Figure 4: **1p** +  $\text{Bu}_4\text{NBF}_4$  (0.06 mmol) + ACN (6 mL) + Argon purging

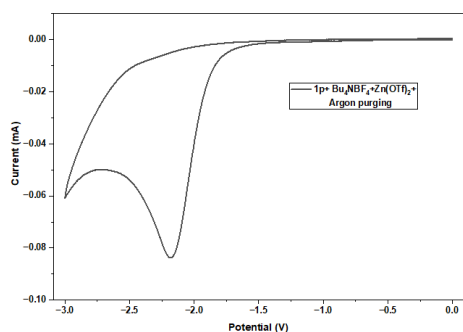

Figure 5: 1p + Bu<sub>4</sub>NBF<sub>4</sub> (0.06 mmol) + ACN (6 mL) + Zn(OTf)<sub>2</sub> + Argon purging

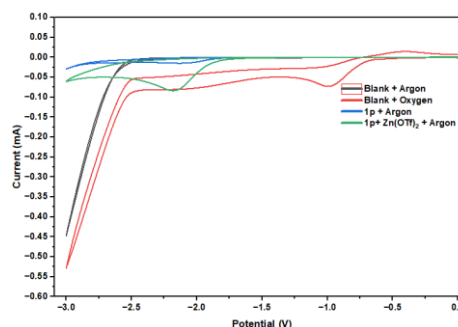

Figure 6

## F. Synthetic applications

### a) Electrochemical scale-up synthesis

#### ➤ Synthesis of $\delta$ -substituted amide (**2p**)

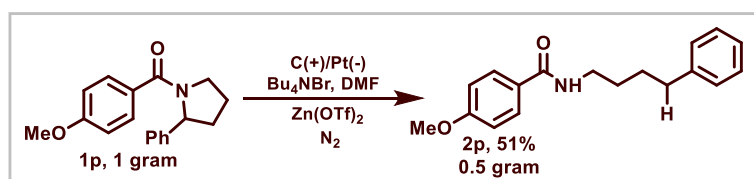

To an undivided cell (20 mL) equipped with a magnetic stirring bar and graphite as anode and platinum as cathode were added pyrrolidine **1p** (3.5 mmol, 1.0 equiv), Bu<sub>4</sub>NBr (7.1 mmol), and zinc trifluoromethanesulfonate (Zn(OTf)<sub>2</sub>: 1.06 mmol). After being sealed with a septum, the vial was evacuated and backfilled three times with N<sub>2</sub> gas. To this vial were added DMF (12.0 mL). After being electrolyzed at a constant current of 10 mA at room temperature for 48 h, the reaction mixture was diluted with water and extracted three times with EtOAc. The combined organic layer was concentrated *in vacuo*, and the residue was purified to afford the corresponding product **2p** in 51% (0.5 gram) yield.

#### ➤ Synthesis of $\delta$ -ketoamides (**4g**)

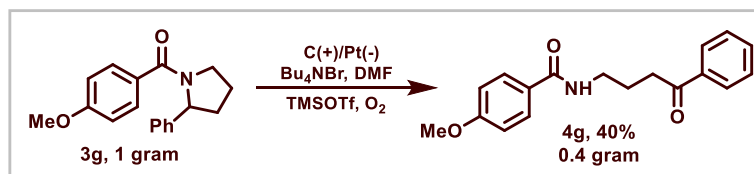

To an undivided cell (20 mL) equipped with a magnetic stirring bar and graphite as anode and platinum as cathode, were added pyrrolidine **3g** (3.5 mmol, 1.0 equiv) and Bu<sub>4</sub>NBr (7.1 mmol). After being sealed with a septum, the vial was evacuated and backfilled three times with O<sub>2</sub> gas. To the vial were added 12.0 mL of DMF and trimethylsilyl trifluoromethanesulfonate (TMSOTf: 1.06 mmol), and kept under a continuous oxygen atmosphere using a balloon. After being electrolyzed at a constant current of 20 mA at room temperature for 60 h, the reaction mixture was diluted with water and extracted three times

with EtOAc. The combined organic layer was concentrated *in vacuo*, and the residue was purified to afford the corresponding product **4g** in 40% yield.

### b) Procedure for the electrochemical scaffold hopping

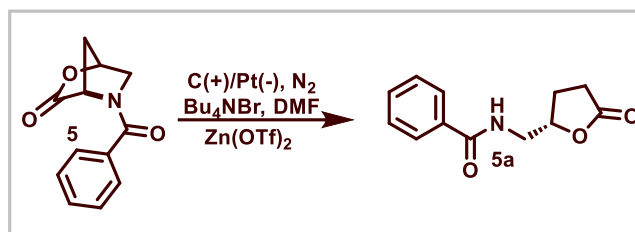

To an undivided cell equipped with a magnetic stirring bar and graphite as anode and platinum as cathode, having dimensions (W×H×D) 8×52.5×2 mm were added bicyclic compound **5** (0.15 mmol, 1.0 equiv), Bu<sub>4</sub>NBr (0.15 mmol), and zinc trifluoromethanesulfonate (Zn(OTf)<sub>2</sub>: 10 mol%). After being sealed with a septum, the vial was evacuated and backfilled three times with N<sub>2</sub> gas. To this vial were added DMF (3.0 mL). After being electrolyzed at a constant current of 10 mA at room temperature for 12 h, the reaction mixture was diluted with water and extracted three times with EtOAc. The combined organic layer was concentrated *in vacuo*, and the residue was purified to afford the corresponding product **5a** in 75% yield.

### c) Reduction of the keto-group in $\delta$ -ketoamides<sup>7</sup>

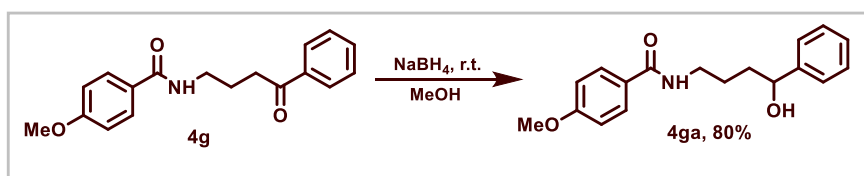

Dissolve  $\delta$ -ketoamides **4g** (0.13 mmol) in methanol (0.8 mL) in a vial. Add NaBH<sub>4</sub> (0.19 mmol) portionwise to the mixture. Observe the vigorous bubbling. Allow the reaction mixture to stand at room temperature until the bubbling ceases. Monitor the completion of the reaction. Extract the mixture *via* workup with CH<sub>2</sub>Cl<sub>2</sub> and H<sub>2</sub>O. Dry the organic layer over MgSO<sub>4</sub>. Filter the mixture. Remove the solvent under vacuum to obtain  $\delta$ -hydroxyamides **4ga** in 80% yield.

### d) S<sub>N</sub>Ar reaction of $\delta$ -hydroxybenzamide<sup>8</sup>

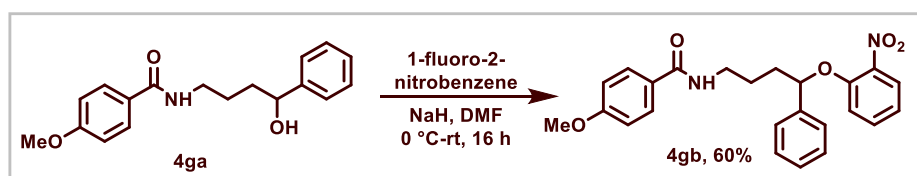

An oven-dried Schlenk tube was charged with sodium hydride (5 mg as 60% w/w dispersion in mineral oil, 0.10 mmol, 1.2 equiv.). After sealing the tube, it was evacuated and back-filled with N<sub>2</sub> three times. Then, a solution of  $\delta$ -hydroxyamide **4ga** (28 mg, 0.09 mmol, 1.1 equiv) in dry DMF (1 mL) was added via syringe under N<sub>2</sub> atmosphere at 0 °C. The reaction was stirred at room temperature for 15 minutes. 1-Fluoro-2-nitrobenzene (9  $\mu$ L, 0.08 mmol, 1.0 equiv) was subsequently added, and the reaction mixture was stirred at room temperature for 16 h. Upon completion, the reaction was quenched by the addition of sat. aqueous NH<sub>4</sub>Cl (2 mL). The aqueous layer was extracted with ethyl acetate (3 x 5 mL), and the combined organic phase was washed with sat. aqueous NaCl (5 mL) and dried over anhydrous Na<sub>2</sub>SO<sub>4</sub>. The crude reaction mixture was then concentrated under reduced pressure and purified *via* column chromatography on silica gel to afford **4gb** in 60% yield.

### e) Synthesis of diacyl amine derivative

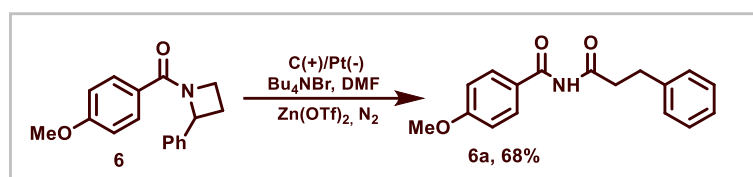

To an undivided cell equipped with a magnetic stirring bar and graphite as anode and platinum as cathode, were added azetidine **6** (0.15 mmol, 1.0 equiv), Bu<sub>4</sub>NBr (0.15 mmol), and zinc trifluoromethanesulfonate (Zn(OTf)<sub>2</sub>: 10 mol%). After being sealed with a septum, the vial was evacuated and backfilled three times with N<sub>2</sub> gas. To this vial were added DMF (3.0 mL). After being electrolyzed at a constant current of 10 mA at room temperature for 12 h, the reaction mixture was diluted with water and extracted three times with EtOAc. The combined organic layer was concentrated *in vacuo*, and the residue was purified to afford the corresponding product **6a** in 68% yield.

### f) Synthesis of an amidine derivative<sup>10</sup>

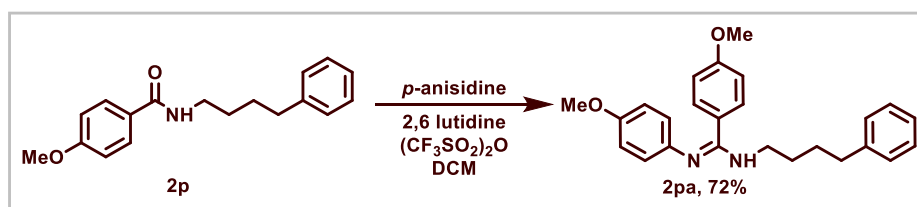

4-methoxy-N-(4-phenylbutyl) benzamide **2p** (30 mg, 0.105 mmol, 1.0 equiv) was dissolved in 1 mL dry dichloromethane in a 10 mL round-bottom flask. 2,6-lutidine (0.026 mL, 0.231 mmol, 2.2 equiv) was then added at 23 °C, under nitrogen. The reaction flask was then cooled in an ice-water bath, and trifluoromethanesulfonic anhydride (0.02 mL, 0.11 mmol, 1.1 equiv) was added. The solution was stirred under nitrogen and gradually warmed to room temperature over 2.5 h. A solution of 4-methoxyaniline (16 mg, 0.127 mmol, 1.2 equiv) in 1 mL dry dichloromethane was then added to the reaction flask, and the contents were stirred overnight at 23 °C. The Reaction was quenched by adding 5 mL of water. The organic layer was separated, and the aqueous layer was extracted with 2x5 mL of ethyl acetate. Combined organic layers were then dried over sodium sulfate, concentrated, and purified using silica gel to get amidine **2pa** in 72% yield.

### g) Synthesis of a thioamide derivative<sup>11</sup>

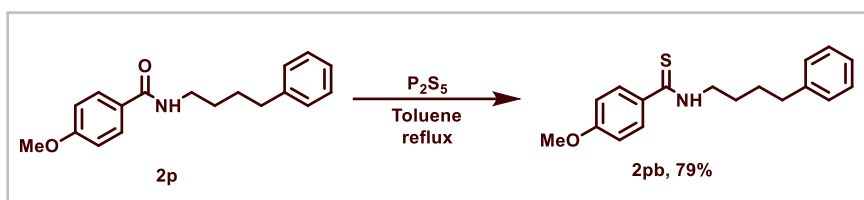

Reflux a solution of substituted benzamide **2p** (0.1 mmol) in toluene (5 mL) containing  $P_2S_5$  (0.2 mmol) under a nitrogen atmosphere, allow the reaction to proceed for 2 h with continuous stirring. After completion, remove the solvent by concentrating the reaction mixture under reduced pressure. Purify the resulting compound silica gel column chromatography using a hexane/ethyl acetate mixture to obtain the desired product **2pb** in 79% yield.

#### h) $\alpha$ -Bromination of $\delta$ -ketoamide<sup>7</sup>

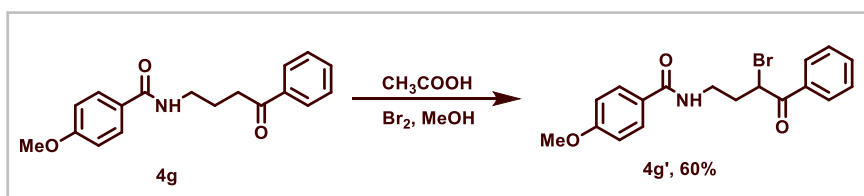

Add  $\delta$ -ketoamide **4g** (0.1 mmol) to a 10 mL three-necked flask. Add 2 mL of anhydrous methanol and glacial acetic acid (0.03 mmol) to the reaction mixture. Add  $Br_2$  (0.1 mmol) dropwise under stirring to the reaction mixture. Monitor the completion of the reaction. Perform the extraction with ethyl acetate. Purify the residue by column chromatography to obtain N-(3-bromo-4-oxo-4-phenylbutyl)-4-methoxybenzamide **4g'** in 60% yield.

## G. Single-crystal X-Ray data for compound **2p**

### Sample preparation:

Solvent used - LR grade  $CHCl_3$

Method used - Recrystallization from  $CHCl_3$  by slow evaporation at room temperature.

For the determination of X-ray crystal structures of **2p**, a single crystal was selected and mounted with paratone oil on a glass fiber using gum. The data were collected at 298K on a CMOS-based Bruker D8 Venture PHOTON 100 diffractometer equipped with an INCOATEC micro-focus source with graphite monochromatic Mo  $K\alpha$  radiation ( $\lambda = 0.71073 \text{ \AA}$ ) operating at 50 kV and 30 mA. For the integration of diffraction profiles SAINT program was used. Absorption correction was done by applying the SADABS HRMS of 4aSI-155 program. The crystal structure was solved by SIR 92 and refined by the full matrix least squares method using the SHELXL-97 WinGX system, Ver 1.70.01. All the non-hydrogen atoms in the structure were located in the Fourier map and refined anisotropically. The hydrogen atoms were fixed by HFIX in their ideal positions and refined using a riding model with

isotropic thermal parameters. The crystal structure (excluding structure factor) has been deposited at the Cambridge Crystallographic Data Centre and allocated deposition number: **CCDC 2420501**.

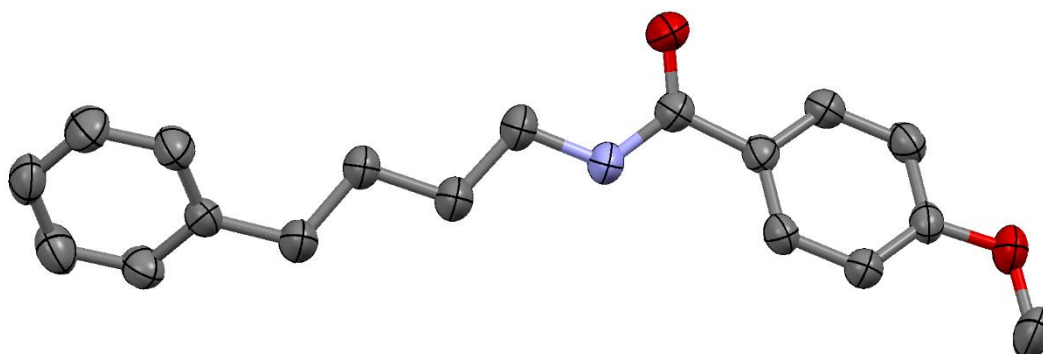

**Figure B.** ORTEP for compound **2p** with ellipsoid probability at 30%

| <b>Table 4. Crystal data and structure refinement for 2p</b> |                                                 |
|--------------------------------------------------------------|-------------------------------------------------|
| Ccdc no.                                                     | 2420501                                         |
| Empirical formula                                            | C <sub>18</sub> H <sub>21</sub> NO <sub>2</sub> |
| Formula weight                                               | 283.36                                          |
| Temperature/K                                                | 298                                             |
| Crystal system                                               | triclinic                                       |
| Space group                                                  | P-1                                             |
| a/Å                                                          | 5.3594(4)                                       |
| b/Å                                                          | 7.8751(5)                                       |
| c/Å                                                          | 18.3484(14)                                     |
| α/°                                                          | 85.295(2)                                       |
| β/°                                                          | 87.694(3)                                       |
| γ/°                                                          | 88.454(2)                                       |
| Volume/Å <sup>3</sup>                                        | 770.96(10)                                      |
| Z                                                            | 2                                               |
| ρ <sub>calc</sub> /cm <sup>3</sup>                           | 1.221                                           |
| μ/mm <sup>-1</sup>                                           | 0.079                                           |
| F(000)                                                       | 304.0                                           |
| Crystal size/mm <sup>3</sup>                                 | 0.235 × 0.156 × 0.123                           |
| Radiation                                                    | MoKα (λ = 0.71073)                              |
| 2θ range for data collection/°                               | 5.192 to 53.316                                 |
| Index ranges                                                 | -6 ≤ h ≤ 6, -9 ≤ k ≤ 9, -22 ≤ l ≤ 22            |
| Reflections collected                                        | 12309                                           |

|                                                |                                                                  |
|------------------------------------------------|------------------------------------------------------------------|
| Independent reflections                        | 3205 [ $R_{\text{int}} = 0.0452$ , $R_{\text{sigma}} = 0.0359$ ] |
| Data/restraints/parameters                     | 3205/0/195                                                       |
| Goodness-of-fit on $F^2$                       | 1.083                                                            |
| Final R indexes [ $I \geq 2\sigma(I)$ ]        | $R_1 = 0.0588$ , $wR_2 = 0.1598$                                 |
| Final R indexes [all data]                     | $R_1 = 0.0699$ , $wR_2 = 0.1683$                                 |
| Largest diff. peak/hole / $e \text{ \AA}^{-3}$ | 0.60/-0.19                                                       |

**Table 5. Bond Lengths for 340467\_0m\_a.**

| Atom | Atom | Length/Å  | Atom | Atom | Length/Å  |
|------|------|-----------|------|------|-----------|
| O1   | C15  | 1.370 (2) | C7   | C8   | 1.507 (3) |
| O1   | C16  | 1.417 (3) | C8   | C9   | 1.518 (2) |
| O2   | C11  | 1.232 (2) | C9   | C10  | 1.499 (3) |
| N1   | C10  | 1.464 (2) | C11  | C12  | 1.494 (2) |
| N1   | C11  | 1.337 (2) | C12  | C13  | 1.391 (2) |
| C3   | C4   | 1.373 (3) | C12  | C18  | 1.386 (2) |
| C3   | C2   | 1.376 (3) | C13  | C14  | 1.376 (2) |
| C4   | C5   | 1.374 (3) | C14  | C15  | 1.389 (3) |
| C5   | C6   | 1.382 (3) | C15  | C17  | 1.385 (2) |
| C6   | C7   | 1.513 (2) | C18  | C17  | 1.388 (2) |
| C6   | C1   | 1.384 (3) | C2   | C1   | 1.380 (3) |

**Table 6. Bond Angles for 340467\_0m\_a.**

| Atom | Atom | Atom | Angle/°     | Atom | Atom | Atom | Angle/°     |
|------|------|------|-------------|------|------|------|-------------|
| C15  | O1   | C16  | 118.04 (15) | N1   | C11  | C12  | 117.30 (16) |
| C11  | N1   | C10  | 121.35 (16) | C13  | C12  | C11  | 117.96 (16) |
| C4   | C3   | C2   | 118.92 (18) | C18  | C12  | C11  | 123.76 (16) |
| C3   | C4   | C5   | 120.67 (18) | C18  | C12  | C13  | 118.24 (16) |
| C4   | C5   | C6   | 121.31 (18) | C14  | C13  | C12  | 121.05 (16) |
| C5   | C6   | C7   | 119.37 (17) | C13  | C14  | C15  | 119.91 (16) |
| C5   | C6   | C1   | 117.56 (17) | O1   | C15  | C14  | 115.22 (15) |
| C1   | C6   | C7   | 123.08 (17) | O1   | C15  | C17  | 124.69 (17) |
| C8   | C7   | C6   | 117.02 (16) | C17  | C15  | C14  | 120.09 (16) |
| C7   | C8   | C9   | 112.19 (16) | C12  | C18  | C17  | 121.51 (16) |
| C10  | C9   | C8   | 113.85 (16) | C15  | C17  | C18  | 119.14 (17) |
| N1   | C10  | C9   | 110.67 (16) | C3   | C2   | C1   | 120.34 (19) |
| O2   | C11  | N1   | 121.79 (17) | C2   | C1   | C6   | 121.20 (18) |
| O2   | C11  | C12  | 120.91 (16) |      |      |      |             |

## H. Calculations of green chemistry metrics<sup>12-13</sup>

### Synthesis of $\delta$ -substituted amide (2p)

To an undivided cell equipped with a magnetic stirring bar and graphite as anode and platinum as cathode, having dimensions (W×H×D) 8×52.5×2 mm, were added pyrrolidine **1p** (0.15 mmol, 1.0 equiv), Bu<sub>4</sub>NBr (0.15 mmol), and zinc trifluoromethanesulfonate (Zn(OTf)<sub>2</sub>: 10 mol%). After being sealed with a septum, the vial was evacuated and backfilled three times with N<sub>2</sub> gas. To this vial was added DMF (3.0 mL). After being electrolyzed at a constant current of 10 mA at room temperature for 12 h, the reaction mixture was diluted with water and extracted with EtOAc. The combined organic layer was concentrated in vacuo, and the residue was purified using silica gel chromatography (neutralized with triethylamine) to afford the corresponding product **2p**. After that, the electrolyte (Bu<sub>4</sub>NBr) was recovered from the column using DCM: MeOH (95:5), the organic layer was concentrated in vacuo and washed with diethyl ether and hexane to afford Bu<sub>4</sub>NBr.<sup>13</sup>

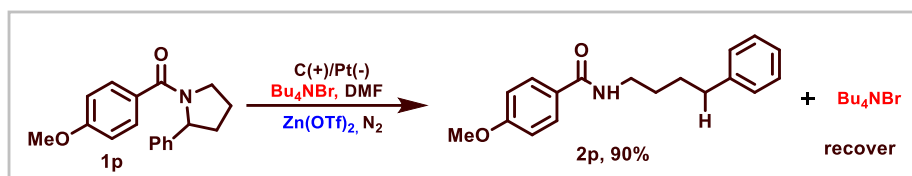

| 1p                                                                       | Zn(OTf) <sub>2</sub>                               | Bu <sub>4</sub> NBr                                | 2p                                       | Bu <sub>4</sub> NBr<br>(recovered) | DMF                                    |
|--------------------------------------------------------------------------|----------------------------------------------------|----------------------------------------------------|------------------------------------------|------------------------------------|----------------------------------------|
| 40 mg, 0.15 mmol<br>MW = 281.1416 g/mol                                  | 5.45 mg, 10 mol%<br>0.015 mmol<br>MW = 363.5 g/mol | 50 mg, 1.0 equiv<br>0.15 mmol<br>MW = 322.37 g/mol | 38 mg<br>0.13 mmol<br>MW = 283.371 g/mol | 20 mg                              | 10 mg<br>0.15 mmol<br>MW = 73.09 g/mol |
| <b>1. Reaction yield</b> = 0.13/0.15×100 = 90%                           |                                                    |                                                    |                                          |                                    |                                        |
| <b>2. Atom Economy (AE):</b> (Catalyst excluded)                         |                                                    |                                                    |                                          |                                    |                                        |
| Molecular Weight of 1p = 281.1416 g/mol                                  |                                                    |                                                    |                                          |                                    |                                        |
| Molecular Weight of Bu <sub>4</sub> NBr = 322.37 g/mol                   |                                                    |                                                    |                                          |                                    |                                        |
| Molecular Weight of DMF = 73.09 g/mol                                    |                                                    |                                                    |                                          |                                    |                                        |
| Molecular Weight of 2p = 283.371 g/mol                                   |                                                    |                                                    |                                          |                                    |                                        |
| AE = 283.371/(281.1416+322.37+73.09)×100 = 41.88%                        |                                                    |                                                    |                                          |                                    |                                        |
| <b>3. Reaction Mass Efficiency:</b>                                      |                                                    |                                                    |                                          |                                    |                                        |
| Effective reactant mass = (40+50+10+5.45)-20 = 85.45 mg                  |                                                    |                                                    |                                          |                                    |                                        |
| Mass of product = 38 mg                                                  |                                                    |                                                    |                                          |                                    |                                        |
| RME = 38/85.45×100 = 44.4%                                               |                                                    |                                                    |                                          |                                    |                                        |
| <b>4. Process Mass Intensity:</b>                                        |                                                    |                                                    |                                          |                                    |                                        |
| Effective input mass = (40+50+5.45+10)-20 = 85.45 mg                     |                                                    |                                                    |                                          |                                    |                                        |
| Mass of product = 38 mg                                                  |                                                    |                                                    |                                          |                                    |                                        |
| PMI = 85.45/38 = 2.24                                                    |                                                    |                                                    |                                          |                                    |                                        |
| <b>5. E-Factor:</b> Total amount of reactant = 40+5.45+50+10 = 105.45 mg |                                                    |                                                    |                                          |                                    |                                        |
| Final compound (2p) = 38 mg                                              |                                                    |                                                    |                                          |                                    |                                        |
| Waste = 105.45-38-20 = 47.45                                             |                                                    |                                                    |                                          |                                    |                                        |
| E-factor = 47.45/38 = 1.24                                               |                                                    |                                                    |                                          |                                    |                                        |

$^1\text{H}$  NMR (400 MHz, CHLOROFORM-D) of  $\text{Bu}_4\text{NBr}$ :

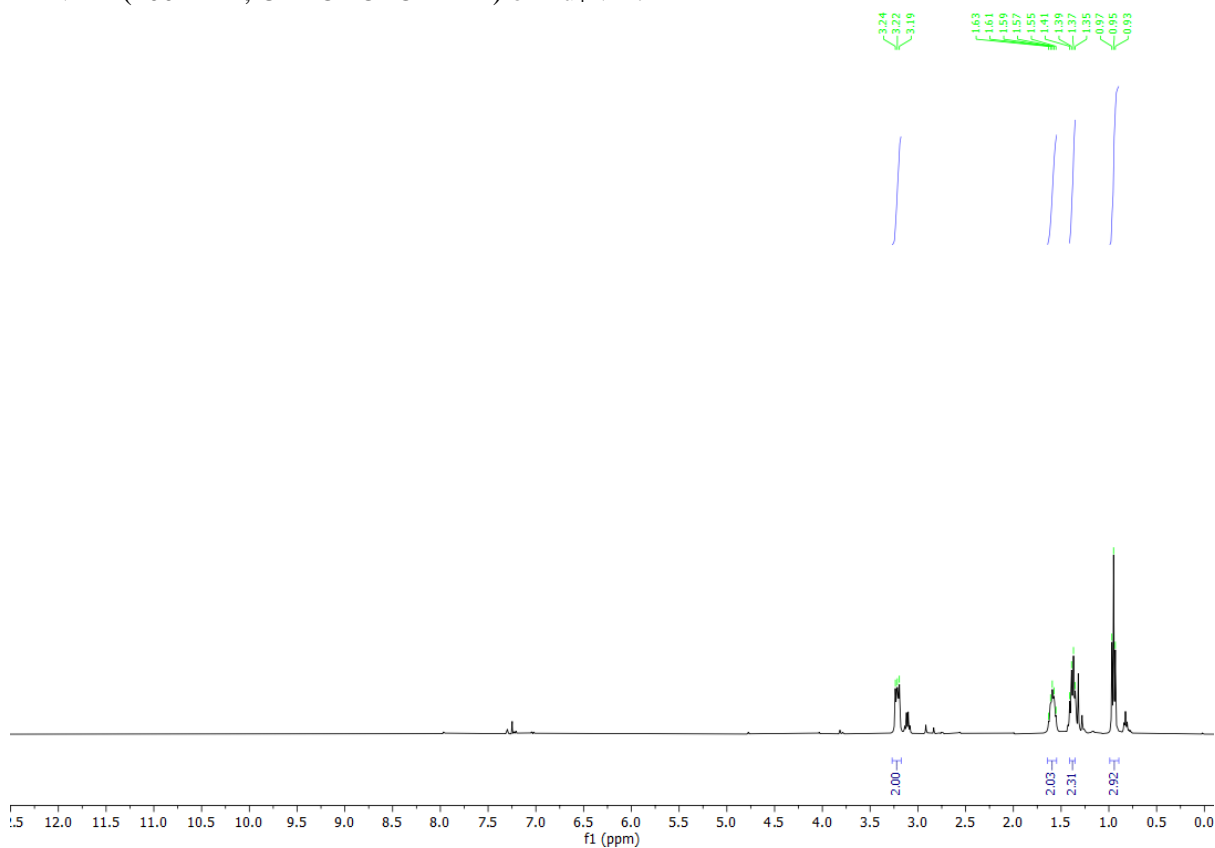

## I. Calculations of faradaic efficiency<sup>14</sup>

The faradaic efficiency of the reaction was calculated using the following formula:

$$n = \frac{Q_{\text{theo}}}{Q_{\text{exp}}} \times 100\%$$

$$Q_{\text{theo}} = z_{\text{P}} \cdot N_{\text{P}} \cdot F = z \cdot N \cdot Y \cdot F$$

$$Q_{\text{exp}} = I \cdot t = z \cdot N \cdot F \cdot \text{equiv.}$$

$$n = \frac{z \cdot N \cdot F \cdot Y}{z \cdot N \cdot F \cdot \text{equiv.}} = \frac{Y}{\text{equiv.}}$$

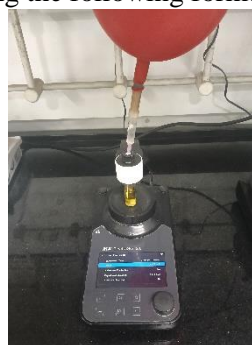

$n$ : Faradaic efficiency in percent [%],  $Q_{\text{theo}}$ : theoretical charge in Coulomb [C],  $Q_{\text{exp}}$ : experimental charge in Coulomb [C], equiv.: electron equivalents ( $\text{F mol}^{-1}$  or equiv.),  $z_{\text{P}}$ : Number of electrons per product [-],  $N_{\text{P}}$ : Number of mols of the product [mol],  $Y$ : yield in percent [%].

Here,  $Y = 90\%$  yield, equiv. =  $5.90 \text{ F mol}^{-1}$ , For 2 electrons system

$$n = 2 \times \frac{90}{5.90} = 30.50\%$$

## J. Characterization data of final compounds & intermediates

### N-(4-phenylbutyl)benzamide (2a)

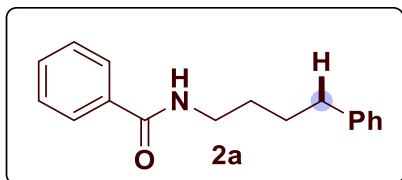

Overall yield: 84%, 32 mg; Nature: white solid;  $R_f = 0.5$  (Hexane/ethyl acetate = 60:40);  $^1\text{H NMR}$  (400 MHz, CHLOROFORM-D)  $\delta$  7.74-7.71 (m, 2H), 7.50 – 7.45 (m, 1H), 7.42 – 7.38 (m, 2H), 7.29-7.25 (m, 2H), 7.20 - 7.16 (m, 3H), 6.15 (s, 1H), 3.46 (q,  $J = 6.6$  Hz, 2H), 2.65 (t,  $J = 7.3$  Hz, 2H), 1.73 - 1.61 (m, 4H);  $^{13}\text{C}\{^1\text{H}\}$  NMR (100 MHz, CHLOROFORM-D);  $\delta$  167.7, 142.2, 134.8, 131.5, 128.7, 128.5, 128.5, 126.9, 126.0, 40.0, 35.6, 29.3, 28.8; HRMS (ESI, Q-TOF)  $m/z$   $[\text{M}+\text{H}]^+$  Calcd for  $\text{C}_{17}\text{H}_{20}\text{NO}$  254.1545, found  $[\text{M}+\text{H}]^+$  254.1556.

### 4-methoxy-N-(4-phenylbutyl)benzamide (2b)

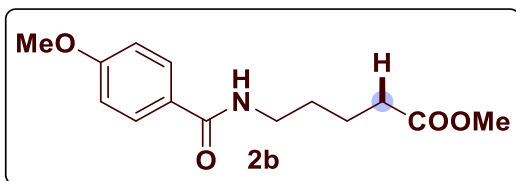

Overall yield: 82%, 32 mg; Nature: white solid;  $R_f = 0.4$  (Hexane/ethyl acetate = 60:40);  $^1\text{H NMR}$  (400 MHz, CHLOROFORM-D)  $\delta$  7.75 – 7.71 (m, 2H), 6.90 – 6.87 (m, 2H), 6.37 (s, 1H), 3.82 (s, 3H), 3.65 (s, 3H), 3.42 (q,  $J = 6.9$  Hz, 2H), 2.35 (t,  $J = 7.1$  Hz, 2H), 1.72 – 1.60 (m, 4H);  $^{13}\text{C}\{^1\text{H}\}$  NMR (100 MHz, CHLOROFORM-D)  $\delta$  174.2, 167.2, 162.2, 128.8, 126.9, 113.8, 55.5, 51.7, 39.5, 33.6, 29.1, 22.1; HRMS (ESI, Q-TOF)  $m/z$   $[\text{M}+\text{Na}]^+$  Calcd for  $\text{C}_{14}\text{H}_{19}\text{NO}_4\text{Na}$  288.1212, found  $[\text{M}+\text{Na}]^+$  288.1223.

### tert-butyl 5-benzamidopentanoate (2c)

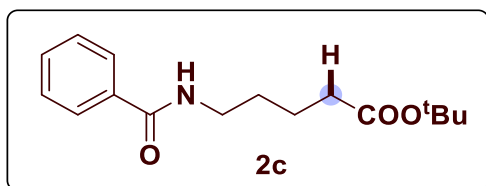

Overall yield: 87%, 36 mg; Nature: colorless oil;  $R_f = 0.5$  (Hexane/ethyl acetate = 60:40);  $^1\text{H NMR}$  (400 MHz, CHLOROFORM-D)  $\delta$  7.78 – 7.74 (m, 2H), 7.46 – 7.36 (m, 3H), 6.57 (s, 1H), 3.41 (td,  $J = 6.4, 6.0$  Hz, 2H), 2.24 (t,  $J = 6.8$  Hz, 2H), 1.66 – 1.58 (m, 4H), 1.41 (s, 9H);  $^{13}\text{C}\{^1\text{H}\}$  NMR (100 MHz, CHLOROFORM-D)  $\delta$  173.2, 167.7, 134.8, 131.4, 128.5, 127.0, 80.4, 39.6, 35.0, 28.9, 28.2, 22.2; HRMS (ESI, Q-TOF)  $m/z$   $[\text{M}+\text{Na}]^+$  Calcd for  $\text{C}_{16}\text{H}_{23}\text{NO}_3\text{Na}$  300.1576, found  $[\text{M}+\text{Na}]^+$  300.1585.

### methyl (R)-5-benzamido-2-methylpentanoate (2d)

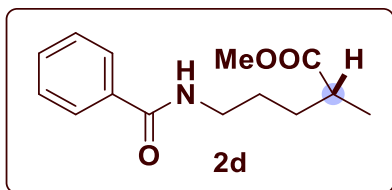

Overall yield: 77%, 28 mg; Nature: colorless oil;  $R_f = 0.4$  (Hexane/ethyl acetate = 60:40);  $^1\text{H NMR}$  (400 MHz, CHLOROFORM-D)  $\delta$  7.77 – 7.74 (m, 2H), 7.50 – 7.45 (m, 1H), 7.44-7.41 (m, 2H), 6.29 (s, 1H), 3.66 (s, 3H), 3.46 – 3.39 (m, 2H), 2.53 – 2.46 (m, 1H), 1.67 – 1.46 (m, 4H), 1.16 (d,  $J = 7.3$  Hz, 3H);  $^{13}\text{C}\{^1\text{H}\}$  NMR (100 MHz, CHLOROFORM-D)  $\delta$  177.2, 167.6, 134.8, 131.5, 128.7, 126.9, 51.7, 39.9, 39.3, 31.0, 27.4, 17.4; HRMS (ESI, Q-TOF)  $m/z$   $[\text{M}+\text{Na}]^+$  Calcd for  $\text{C}_{14}\text{H}_{19}\text{NO}_3\text{Na}$  272.1263, found  $[\text{M}+\text{Na}]^+$  272.1278.

### methyl (5-(4-methoxybenzamido) pentanoyl)-D-phenylalaninate (2e)

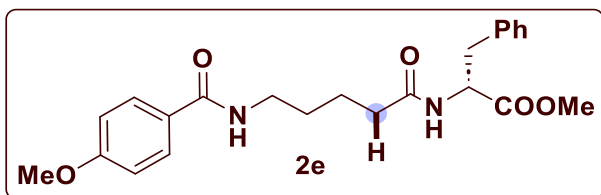

Overall yield: 67%, 38 mg; Nature: yellow solid;  $R_f = 0.5$  (Hexane/ethyl acetate = 20:80);  $^1\text{H NMR}$  (400 MHz, CHLOROFORM-D)  $\delta$  7.77 – 7.73 (m, 2H), 7.28 – 7.25 (m, 1H), 7.24 – 7.20 (m, 2H), 7.10 – 7.06 (m, 2H), 6.93 – 6.89 (m, 2H), 6.47 (s, 1H), 6.05 (d,  $J = 7.8$  Hz, 1H), 4.88 (dt,  $J = 7.8, 6.0$  Hz, 1H), 3.83 (s, 3H), 3.71 (s, 3H), 3.42 – 3.36 (m, 2H), 3.14 (dd,  $J = 14.0, 5.7$  Hz, 1H), 3.04 (dd,  $J = 14.0, 6.6$  Hz, 1H), 2.26-2.21 (m, 2H), 1.71-1.64 (m, 2H), 1.61 – 1.52 (m, 2H);  $^{13}\text{C}\{^1\text{H}\}$  NMR (100 MHz, CHLOROFORM-D)  $\delta$  172.8, 172.3, 167.2, 162.2, 135.9, 129.3, 128.9, 128.8, 127.3, 126.9, 113.8, 55.5, 53.1, 52.5, 39.2, 38.0, 35.5, 28.7, 22.4; HRMS (ESI, Q-TOF)  $m/z$   $[\text{M}+\text{H}]^+$  Calcd for  $\text{C}_{23}\text{H}_{29}\text{N}_2\text{O}_5$  413.2076, found  $[\text{M}+\text{H}]^+$  413.2074.

### benzyl 3-((1S,2S)-2-benzamidocyclopentyl)propanoate (2f)

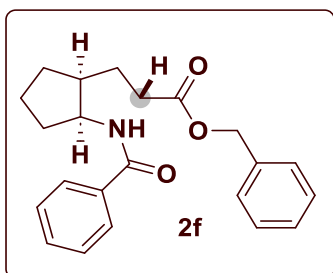

Overall yield: 74%, 39 mg; Nature: white solid;  $R_f = 0.5$  (Hexane/ethyl acetate = 60:40);  $^1\text{H NMR}$  (400 MHz, CHLOROFORM-D)  $\delta$  7.73-7.70 (m, 2H), 7.51 – 7.46 (m, 1H), 7.44-7.41 (m, 2H), 7.33-7.28 (m, 5H), 5.94 (d,  $J = 8.2$  Hz, 1H), 5.07 (s, 2H), 4.58 – 4.49 (m, 1H), 2.43 (t,  $J = 7.8$  Hz, 2H), 2.08-2.00 (m, 2H), 1.93 – 1.65 (m, 6H), 1.34 – 1.29 (m, 1H);  $^{13}\text{C}\{^1\text{H}\}$  NMR (100 MHz, CHLOROFORM-D)  $\delta$  173.7, 167.4, 136.1, 135.0, 131.5, 128.7, 128.6, 128.3, 126.9, 66.3, 53.0, 42.6, 33.2, 32.4, 29.6, 25.1, 21.7; HRMS (ESI, Q-TOF)  $m/z$   $[\text{M}+\text{Na}]^+$  Calcd for  $\text{C}_{22}\text{H}_{25}\text{NO}_3\text{Na}$  374.1732, found  $[\text{M}+\text{Na}]^+$  374.1745.

### methyl 3-(2-benzamidophenyl)propanoate (2g)

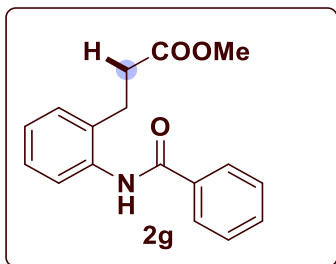

Overall yield: 38%, 16 mg; Nature: colorless oil;  $R_f = 0.5$  (Hexane/ethyl acetate = 60:40);  $^1\text{H NMR}$  (400 MHz, CHLOROFORM-D)  $\delta$  9.63 (s, 1H), 8.12-8.09 (m, 2H), 7.83 (d,  $J = 6.9$  Hz, 1H), 7.55 – 7.50 (m, 3H), 7.28 (dd,  $J = 6.9, 1.8$  Hz, 1H), 7.21-7.15 (m, 2H), 3.66 (s, 3H), 2.92 (dd,  $J = 7.6, 4.8$  Hz, 2H), 2.77 (dd,  $J = 7.3, 5.0$  Hz, 2H);  $^{13}\text{C}\{^1\text{H}\}$  NMR (100 MHz, CHLOROFORM-D)  $\delta$  175.4, 166.0, 135.7, 134.9, 133.3, 131.8, 130.0, 128.9, 127.6, 127.2, 125.8, 125.7, 52.3, 35.6, 25.1; HRMS (ESI, Q-TOF)  $m/z$   $[\text{M}+\text{H}]^+$  Calcd for  $\text{C}_{17}\text{H}_{18}\text{NO}_3$  284.1287, found  $[\text{M}+\text{H}]^+$  284.1261.

### methyl 3-(2-(4-methoxybenzamido)phenyl)propanoate (2h)

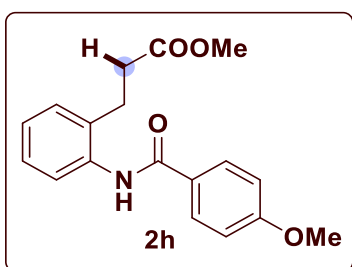

Overall yield: 81%, 38 mg; Nature: colorless oil;  $R_f = 0.45$  (Hexane/ethyl acetate = 60:40);  $^1\text{H NMR}$  (400 MHz, CHLOROFORM-D)  $\delta$  9.51 (s, 1H), 8.08 – 8.04 (m, 2H), 7.81 (dd,  $J = 8.0, 1.6$  Hz, 1H), 7.28 – 7.25 (m, 1H), 7.20 – 7.11 (m, 2H), 7.01 – 6.97 (m, 2H), 3.87 (s, 3H), 3.66 (s, 3H), 2.94 – 2.89 (m, 2H), 2.77 (dd,  $J = 7.6, 4.8$  Hz, 2H);  $^{13}\text{C}\{^1\text{H}\}$  NMR (100 MHz, CHLOROFORM-D)  $\delta$  175.5, 165.5, 162.4, 135.9, 133.2, 130.0, 129.4, 127.2, 127.2, 125.7, 125.6, 113.9, 55.5, 52.3, 35.6, 25.1; HRMS (ESI, Q-TOF)  $m/z$   $[\text{M}+\text{H}]^+$  Calcd for  $\text{C}_{18}\text{H}_{20}\text{NO}_4$  314.1392, found  $[\text{M}+\text{H}]^+$  314.1386.

### N-phenethylbenzamide (2i)

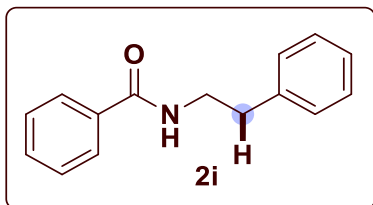

Overall yield: 85%, 28 mg; Nature: white solid;  $R_f = 0.5$  (Hexane/ethyl acetate = 60:40);  $^1\text{H NMR}$  (400 MHz, CHLOROFORM-D)  $\delta$  7.68 (dd,  $J = 7.6, 2.1$  Hz, 2H), 7.49 – 7.44 (m, 1H), 7.39 (dd,  $J = 8.7, 6.4$  Hz, 2H), 7.34 – 7.30 (m, 2H), 7.23 (td,  $J = 6.2, 2.3$  Hz, 3H), 6.22 (s, 1H), 3.71 (q,  $J = 6.6$  Hz, 2H), 2.92 (t,  $J = 7.1$  Hz, 2H);  $^{13}\text{C}\{^1\text{H}\}$  NMR (100 MHz, CHLOROFORM-D)  $\delta$  167.6, 139.0, 134.7, 131.5, 128.9, 128.8, 128.7, 126.9, 126.7, 41.3, 35.8; HRMS (ESI, Q-TOF)  $m/z$   $[\text{M}+\text{H}]^+$  Calcd for  $\text{C}_{15}\text{H}_{16}\text{NO}$  226.1232, found  $[\text{M}+\text{H}]^+$  226.1216.

### N-(3-phenylpropyl)benzamide (2j)

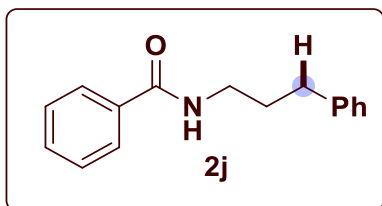

Overall yield: 70%, 25 mg; Nature: white solid;  $R_f = 0.5$  (Hexane/ethyl acetate = 60:40);  $^1\text{H NMR}$  (400 MHz, CHLOROFORM-D)  $\delta$  7.67-7.64 (m, 2H), 7.49-7.44 (m, 1H), 7.41 – 7.35 (m, 3H), 7.31 – 7.26 (m, 2H), 7.20 (d,  $J = 4.6$  Hz, 2H), 6.14 (s, 1H), 3.49 (q,  $J = 6.9$  Hz, 2H), 2.72 (t,  $J = 7.6$  Hz, 2H), 1.99-1.92 (m, 2H);  $^{13}\text{C}\{^1\text{H}\}$  NMR (100 MHz, CHLOROFORM-D)  $\delta$  167.6, 141.6,

134.7, 131.5, 128.7, 128.6, 128.5, 126.9, 126.2, 39.9, 33.6, 31.2; **HRMS** (ESI, Q-TOF)  $m/z$   $[M+H]^+$  Calcd for  $C_{16}H_{18}NO$  240.1388, found  $[M+H]^+$  240.1372.

### methyl 4-benzamidobutanoate (2k)

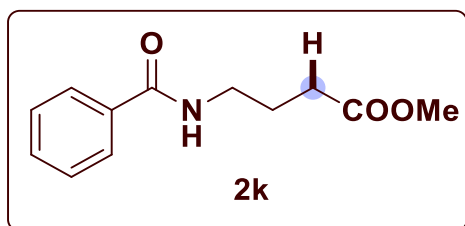

Overall yield: 82%, 27 mg; Nature: colorless oil;  $R_f$  = 0.5 (Hexane/ethyl acetate = 60:40);  $^1H$  NMR (400 MHz, CHLOROFORM-D)  $\delta$  7.77-7.74 (m, 2H), 7.50 – 7.43 (m, 1H), 7.41-7.38 (m, 2H), 6.74 (s, 1H), 3.63 (s, 3H), 3.49-3.44 (m, 2H), 2.41 (t,  $J$  = 7.1 Hz, 2H), 1.96-1.89 (m, 2H);  $^{13}C\{^1H\}$  NMR (100 MHz, CHLOROFORM-D)  $\delta$  174.3, 167.7, 134.8, 131.2, 128.6, 127.2, 51.9, 39.7, 31.8, 24.5; **HRMS** (ESI, Q-TOF)  $m/z$   $[M+Na]^+$  Calcd for  $C_{12}H_{15}NO_3Na$  244.0950, found  $[M+Na]^+$  244.0953.

### methyl 6-benzamidohexanoate (2l)

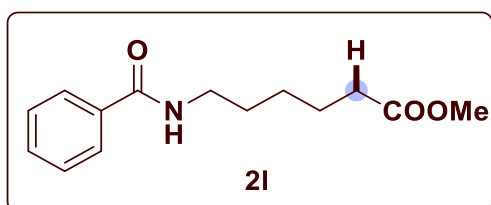

Overall yield: 47%, 17 mg; Nature: colorless oil;  $R_f$  = 0.5 (Hexane/ethyl acetate = 60:40);  $^1H$  NMR (400 MHz, CHLOROFORM-D)  $\delta$  7.77-7.74 (m, 2H), 7.50 – 7.46 (m, 1H), 7.43 – 7.39 (m, 2H), 6.19 (s, 1H), 3.65 (s, 3H), 3.48 – 3.43 (m, 2H), 2.32 (t,  $J$  = 7.3 Hz, 2H), 1.69 – 1.61 (m, 4H), 1.46 – 1.36 (m, 2H);  $^{13}C\{^1H\}$  NMR (100 MHz, CHLOROFORM-D)  $\delta$  174.2, 167.6, 134.8, 131.5, 128.7, 126.9, 51.6, 39.8, 33.9, 29.4, 26.5, 24.5; **HRMS** (ESI, Q-TOF)  $m/z$   $[M+Na]^+$  Calcd for  $C_{14}H_{19}NO_3Na$  272.1263, found  $[M+Na]^+$  272.1282.

### 2-chloro-N-(4-phenylbutyl)benzamide (2m)

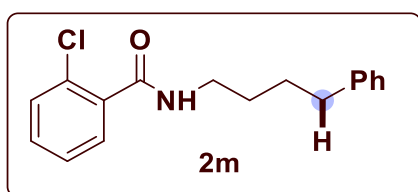

Overall yield: 57%, 27 mg; Nature: white solid;  $R_f$  = 0.5 (Hexane/ethyl acetate = 60:40);  $^1H$  NMR (400 MHz, CHLOROFORM-D)  $\delta$  7.74-7.71 (m, 2H), 7.50 – 7.45 (m, 1H), 7.44 – 7.39 (m, 2H), 7.29 – 7.26 (m, 1H), 7.20 – 7.16 (m, 3H), 6.09 (s, 1H), 3.50 – 3.44 (m, 2H), 2.66 (t,  $J$  = 7.3 Hz, 2H), 1.74 – 1.63 (m, 4H);  $^{13}C\{^1H\}$  NMR (100 MHz, CHLOROFORM-D)  $\delta$  167.6, 142.1, 134.8, 131.4, 128.6, 128.5, 128.4, 128.3, 126.8, 125.9, 39.9, 35.5, 29.3, 28.8; **HRMS** (ESI, Q-TOF)  $m/z$   $[M+H]^+$  Calcd for  $C_{17}H_{19}NOCl$  288.1155, found  $[M+H]^+$  288.1166.

### 3-methyl-N-(4-phenylbutyl)benzamide (2n)

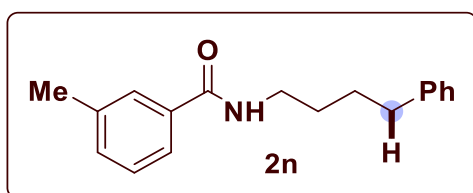

Overall yield: 70%, 28 mg; Nature: white solid;  $R_f$  = 0.5 (Hexane/ethyl acetate = 60:40);  $^1H$  NMR (400 MHz, CHLOROFORM-D)  $\delta$  7.56-7.54 (m, 1H), 7.51 – 7.47 (m, 1H), 7.30 – 7.27 (m, 2H), 7.24-7.23 (m, 2H), 7.18-7.16 (m,

3H), 6.04 (s, 1H), 3.46 (td,  $J=6.4, 6.0$  Hz, 2H), 2.65 (t,  $J = 6.0$  Hz, 2H), 2.37 (s, 3H), 1.73 – 1.62 (m, 4H);  $^{13}\text{C}\{^1\text{H}\}$  NMR (100 MHz, CHLOROFORM-D)  $\delta$  167.8, 142.1, 138.5, 134.8, 132.1, 128.5, 128.4, 127.6, 127.1, 125.9, 123.8, 39.9, 35.5, 29.3, 28.8, 21.4; HRMS (ESI, Q-TOF)  $m/z$   $[\text{M}+\text{H}]^+$  Calcd for  $\text{C}_{18}\text{H}_{22}\text{NO}$  268.1701, found  $[\text{M}+\text{H}]^+$  268.1703.

#### 4-methyl-N-(4-phenylbutyl)benzamide (2o)

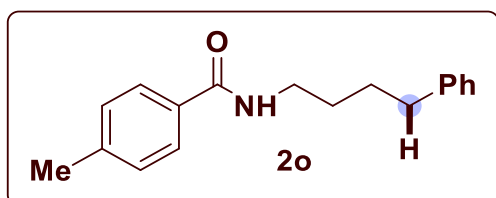

Overall yield: 77%, 30 mg; Nature: white solid;  $R_f = 0.5$  (Hexane/ethyl acetate = 60:40);  $^1\text{H}$  NMR (400 MHz, CHLOROFORM-D)  $\delta$  7.65 – 7.61 (m, 2H), 7.28 – 7.24 (m, 2H), 7.18 (m, 5H), 6.15 (s, 1H), 3.47-3.41 (m, 2H), 2.64 (t,  $J = 5.7$  Hz, 2H), 2.36 (s, 3H), 1.71 – 1.61 (m, 4H);  $^{13}\text{C}\{^1\text{H}\}$  NMR (100 MHz, CHLOROFORM-D)  $\delta$  167.6, 142.2, 141.8, 132.0, 129.3, 128.5, 128.5, 126.9, 125.9, 39.9, 35.6, 29.4, 28.9, 21.5; HRMS (ESI, Q-TOF)  $m/z$   $[\text{M}+\text{H}]^+$  Calcd for  $\text{C}_{18}\text{H}_{22}\text{NO}$  268.1701, found  $[\text{M}+\text{H}]^+$  268.1715.

#### 4-methoxy-N-(4-phenylbutyl)benzamide (2p)

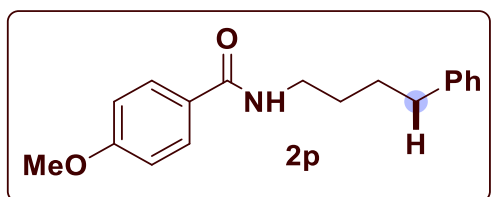

Overall yield: 90%, 38 mg; Nature: white solid;  $R_f = 0.5$  (Hexane/ethyl acetate = 60:40);  $^1\text{H}$  NMR (400 MHz, CHLOROFORM-D)  $\delta$  7.71 – 7.67 (m, 2H), 7.29 – 7.24 (m, 2H), 7.17-7.14 (m, 3H), 6.91 – 6.87 (m, 2H), 6.09 (s, 1H), 3.82 (s, 3H), 3.47 – 3.41 (m, 2H), 2.64 (t,  $J = 7.3$  Hz, 2H), 1.71-1.60 (m, 4H);  $^{13}\text{C}\{^1\text{H}\}$  NMR (100 MHz, CHLOROFORM-D)  $\delta$  167.2, 162.1, 142.2, 128.7, 128.5, 128.5, 127.1, 125.9, 113.8, 55.5, 39.9, 35.6, 29.4, 28.9; HRMS (ESI, Q-TOF)  $m/z$   $[\text{M}+\text{H}]^+$  Calcd for  $\text{C}_{18}\text{H}_{22}\text{NO}_2$  284.1651, found  $[\text{M}+\text{H}]^+$  284.1664.

#### 3,5-dibromo-N-(4-phenylbutyl)benzamide (2q)

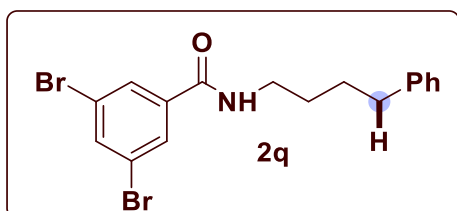

Overall yield: 55%, 33 mg; Nature: white solid;  $R_f = 0.5$  (Hexane/ethyl acetate = 60:40);  $^1\text{H}$  NMR (400 MHz, CHLOROFORM-D)  $\delta$  7.73 (dd,  $J = 7.1, 2.1$  Hz, 2H), 7.50 – 7.45 (m, 1H), 7.42 – 7.40 (m, 1H), 7.29 – 7.25 (m, 2H), 7.18 – 7.15 (m, 2H), 6.18 (s, 1H), 3.48 – 3.43 (m, 2H), 2.65 (t,  $J = 7.3$  Hz, 2H), 1.72-1.62 (m, 4H);  $^{13}\text{C}\{^1\text{H}\}$  NMR (100 MHz, CHLOROFORM-D)  $\delta$  167.6, 142.2, 134.8, 131.5, 128.7, 128.5, 128.5, 126.9, 126.0, 40.0, 35.6, 29.3, 28.8; HRMS (ESI, Q-TOF)  $m/z$   $[\text{M}+\text{H}]^+$  Calcd for  $\text{C}_{17}\text{H}_{18}\text{Br}_2\text{NO}$  409.9755, found  $[\text{M}+\text{H}]^+$  409.9760.

### N-(4-phenylbutyl)benzo[d][1,3]dioxole-5-carboxamide (2r)

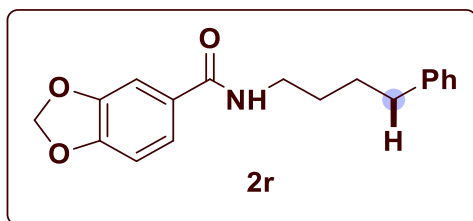

Overall yield: 74%, 33 mg; Nature: white solid;  $R_f$  = 0.4 (Hexane/ethyl acetate = 60:40);  $^1\text{H NMR}$  (400 MHz, CHLOROFORM-D)  $\delta$  7.27 (dd,  $J$  = 7.3, 5.5 Hz, 2H), 7.24 (d,  $J$  = 1.4 Hz, 2H), 7.17 (td,  $J$  = 6.9, 1.8 Hz, 3H), 6.80 – 6.77 (m, 1H), 6.12 (s, 1H), 5.99 (s, 2H), 3.44 – 3.39 (m, 2H), 2.64 (t,  $J$  = 7.3 Hz, 2H), 1.69 – 1.59 (m, 4H);  $^{13}\text{C}\{^1\text{H}\}$  NMR (100 MHz, CHLOROFORM-D)  $\delta$  166.9, 150.3, 148.0, 142.2, 129.0, 128.5, 128.4, 125.9, 121.5, 108.0, 107.7, 101.7, 40.1, 35.6, 29.3, 28.8; HRMS (ESI, Q-TOF)  $m/z$   $[\text{M}+\text{H}]^+$  Calcd for  $\text{C}_{18}\text{H}_{20}\text{NO}_3$  298.1443, found  $[\text{M}+\text{H}]^+$  298.1433.

### (3S,10R,13R)-10,13-dimethyl-17-((R)-6-methylheptan-2-yl)2,3,4,7,8,9,10,11,12,13,14,15,16,17-tetradecahydro-1H-cyclopenta[a]phenanthren-3-yl 5-(4-methoxybenzamido) pentanoate (2aa)

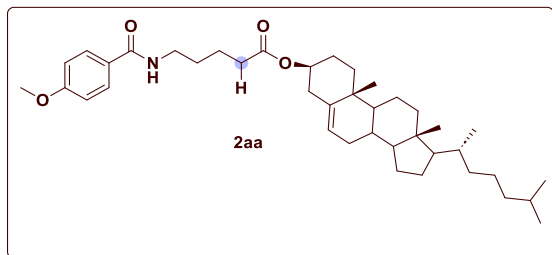

Overall yield: 55%, 51 mg; Nature: white solid;  $R_f$  = 0.5 (Hexane/ethyl acetate = 50:50);  $^1\text{H NMR}$  (400 MHz, CHLOROFORM-D)  $\delta$  7.73 (dd,  $J$  = 9.6, 2.7 Hz, 2H), 6.93 – 6.89 (m, 2H), 6.25 (s, 1H), 5.47 – 5.38 (m, 1H), 3.83 (s, 3H), 3.82 (br s, 1H), 3.43 (td,  $J$  = 6.0, 5.9 Hz, 2H), 2.35 – 2.28 (m, 2H), 2.25 – 2.05 (m, 2H), 1.99 – 1.68 (m, 6H), 1.57 – 1.26 (m, 16H), 1.20 – 0.97 (m, 13H), 0.85 (s, 3H), 0.84 (d,  $J$  = 1.8 Hz, 3H), 0.71 – 0.58 (m, 5H);  $^{13}\text{C}\{^1\text{H}\}$  NMR (100 MHz, CHLOROFORM-D)  $\delta$  173.0, 167.1, 162.2, 159.9, 128.7, 127.0, 113.8, 83.1, 71.7, 63.7, 62.6, 56.2, 47.2, 42.8, 42.4, 40.5, 39.6, 38.2, 36.7, 36.2, 35.8, 35.1, 34.8, 34.0, 32.0, 31.7, 31.0, 29.8, 28.1, 26.4, 24.1, 23.9, 22.9, 22.7, 22.2, 22.0, 21.3, 18.7, 17.4, 17.1, 14.2, 13.9, 12.3, 11.8; HRMS (ESI, Q-TOF)  $m/z$   $[\text{M}+\text{H}]^+$  Calcd for  $\text{C}_{40}\text{H}_{62}\text{NO}_4$  620.4679, found  $[\text{M}+\text{H}]^+$  620.4689.

### (1S,2R,5S)-2-isopropyl-5-methylcyclohexyl 5-(4-methoxybenzamido) pentanoate (2ab)

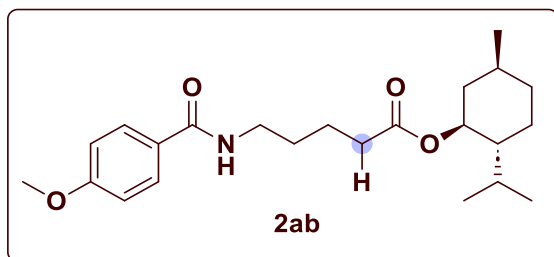

Overall yield: 62%, 36 mg; Nature: viscous oil;  $R_f = 0.5$  (Hexane/ethyl acetate = 60:40);  $^1\text{H NMR}$  (400 MHz, CHLOROFORM-D)  $\delta$  7.75 – 7.72 (m, 2H), 6.92 – 6.88 (m, 2H), 6.30 (s, 1H), 4.67 (td,  $J = 11.0, 4.4$  Hz, 1H), 3.83 (s, 3H), 3.43 (q,  $J = 6.6$  Hz, 2H), 2.33 (t,  $J = 7.1$  Hz, 2H), 2.00 – 1.92 (m, 2H), 1.68-1.62 (m, 5H), 1.50 – 1.42 (m, 2H), 1.39 – 1.30 (m, 2H), 1.08-0.97 (m, 2H), 0.87 (d,  $J = 2.3$  Hz, 6H), 0.73 (d,  $J = 6.9$  Hz, 3H);  $^{13}\text{C}\{^1\text{H}\}$  NMR (100 MHz, CHLOROFORM-D)  $\delta$  173.4, 167.1, 162.1, 128.7, 127.0, 113.8, 74.3, 55.5, 47.1, 41.0, 39.5, 34.3, 34.2, 31.5, 29.1, 26.4, 23.5, 22.2, 22.1, 20.8, 16.4; HRMS (ESI, Q-TOF)  $m/z$   $[\text{M}+\text{H}]^+$  Calcd for  $\text{C}_{23}\text{H}_{36}\text{NO}_4$  390.2644, found  $[\text{M}+\text{H}]^+$  390.2639.

**(3S,10R,13S,17S)-17-acetyl-10,13-dimethyl-2,3,4,7,8,9,10,11,12,13,14,15,16,17-tetradecahydro-1H-cyclopenta[a]phenanthren-3-yl 5-(4-methoxybenzamido)pentanoate (2ac)**

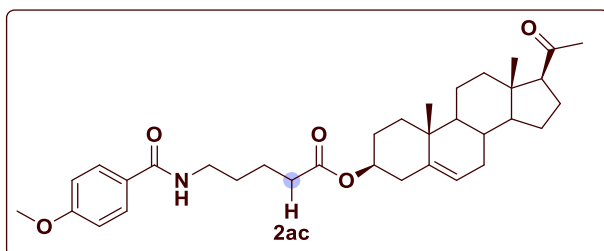

Overall yield: 37%, 30 mg; Nature: white solid;  $R_f = 0.5$  (Hexane/ethyl acetate = 50:50);  $^1\text{H NMR}$  (400 MHz, CHLOROFORM-D)  $\delta$  7.74-7.71 (m, 2H), 6.92 – 6.90 (m, 2H), 6.22 (br s, 1H), 5.43 (br s, 1H), 4.57 (br s, 1H), 3.83 (s, 3H), 3.44-3.42 (m, 2H), 2.58 – 2.45 (m, 2H), 2.33-2.31 (m, 2H), 2.11 (s, 3H), 2.09 (s, 2H), 2.01-1.95 (m, 5H), 1.69-1.64 (s, 8H), 1.45-1.41 (m, 5H), 0.65 – 0.53 (m, 7H);  $^{13}\text{C}\{^1\text{H}\}$  NMR (100 MHz, CHLOROFORM-D)  $\delta$  209.6, 167.1, 162.2, 159.8, 129.5, 128.7, 127.0, 113.8, 113.5, 82.9, 71.6, 63.5, 56.4, 55.8, 50.9, 47.1, 46.0, 44.3, 40.6, 39.5, 38.9, 34.8, 34.0, 31.7, 29.8, 26.3, 24.3, 22.9, 22.2, 21.3, 17.4, 13.7, 8.7; HRMS (ESI, Q-TOF)  $m/z$   $[\text{M}+\text{H}]^+$  Calcd for  $\text{C}_{34}\text{H}_{48}\text{NO}_5$  550.3532, found  $[\text{M}+\text{H}]^+$  550.3505.

**3-phenylpropyl 5-(4-methoxybenzamido) pentanoate (2ad)**

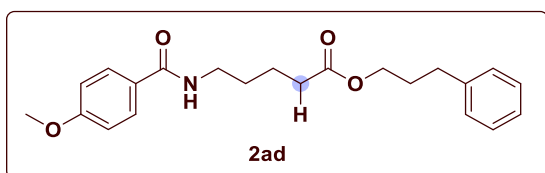

Overall yield: 55%, 30 mg; Nature: viscous oil;  $R_f = 0.5$  (Hexane/ethyl acetate = 60:40);  $^1\text{H NMR}$  (400 MHz, CHLOROFORM-D)  $\delta$  7.76 – 7.71 (m, 2H), 7.29 – 7.25 (m, 2H), 7.20 – 7.14 (m, 3H), 6.92 – 6.88 (m, 2H), 6.27 (s, 1H), 4.09 (t,  $J = 6.4$  Hz, 2H), 3.83 (s, 3H), 3.44 (q,  $J = 6.4$  Hz, 2H), 2.69 – 2.65 (m, 2H), 2.36 (t,  $J = 7.1$  Hz, 2H), 1.98 – 1.90 (m, 2H), 1.70 – 1.60 (m, 4H).;  $^{13}\text{C}\{^1\text{H}\}$  NMR (100 MHz, CHLOROFORM-D)  $\delta$  173.8, 167.1, 162.1, 141.2, 128.7, 128.5, 128.4, 126.9, 126.1, 113.8, 63.9, 55.5, 39.5, 33.7, 32.2, 30.2, 29.1, 22.1; HRMS (ESI, Q-TOF)  $m/z$   $[\text{M}+\text{H}]^+$  Calcd for  $\text{C}_{22}\text{H}_{28}\text{NO}_4$  370.2018, found  $[\text{M}+\text{H}]^+$  370.2013.

### (tetrahydrofuran-2-yl) methyl 5-(4-methoxybenzamido)pentanoate (2ae)

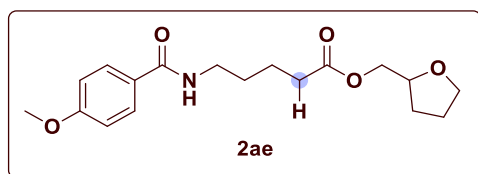

Overall yield: 68%, 34 mg; Nature: colorless oil;  $R_f = 0.4$  (Hexane/ethyl acetate = 60:40);  $^1\text{H NMR}$  (400 MHz, CHLOROFORM-D)  $\delta$  7.75 – 7.71 (m, 2H), 6.93 – 6.88 (m, 2H), 6.30 (s, 1H), 4.18 – 4.09 (m, 2H), 4.01–3.96 (m, 1H), 3.88–3.84 (m, 1H), 3.83 (s, 3H), 3.80 – 3.74 (m, 1H), 3.43 (q,  $J = 6.4$  Hz, 2H), 2.41 (t,  $J = 7.1$  Hz, 2H), 2.03 – 1.84 (m, 4H), 1.76–1.68 (m, 2H), 1.63 – 1.53 (m, 2H);  $^{13}\text{C}\{^1\text{H}\}$  NMR (100 MHz, CHLOROFORM-D)  $\delta$  173.7, 167.2, 162.1, 128.8, 127.1, 113.8, 68.5, 66.6, 55.5, 39.5, 33.7, 29.8, 29.0, 28.0, 25.8, 22.1; HRMS (ESI, Q-TOF)  $m/z$   $[\text{M}+\text{H}]^+$  Calcd for  $\text{C}_{18}\text{H}_{26}\text{NO}_5$  336.1811, found  $[\text{M}+\text{H}]^+$  336.1805.

### 2,5,7,8-tetramethyl-2-(4,8,12-trimethyltridecyl)chroman-6-yl 5-(4-methoxybenzamido) pentanoate (2af)

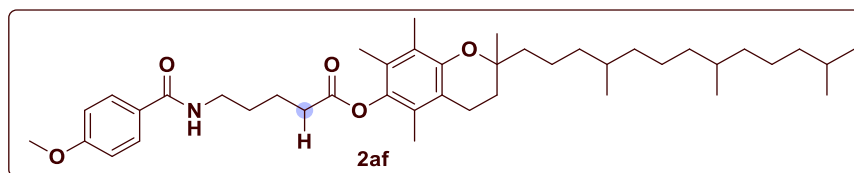

Overall yield: 27%, 26 mg; Nature: white solid;  $R_f = 0.5$  (Hexane/ethyl acetate = 50:50);  $^1\text{H}$

NMR (400 MHz, CHLOROFORM-D)  $\delta$  7.73 – 7.71 (m, 2H), 6.91–6.86 (m, 2H), 6.24 (s, 1H), 3.83 (s, 3H), 3.51 – 3.47 (m, 2H), 2.66 (t,  $J = 7.1$  Hz, 2H), 2.57 (t,  $J = 6.6$  Hz, 2H), 2.07 (s, 4H), 1.99 (s, 3H), 1.94 (s, 3H), 1.91 – 1.82 (m, 4H), 1.80–1.73 (m, 5H), 1.54 – 1.47 (m, 4H), 1.40 – 1.31 (m, 8H), 1.12 – 1.06 (m, 7H), 0.86 (s, 3H), 0.84 (s, 3H), 0.83 (s, 3H), 0.82 (s, 3H);  $^{13}\text{C}\{^1\text{H}\}$  NMR (100 MHz, CHLOROFORM-D)  $\delta$  172.4, 167.2, 162.2, 149.5, 140.5, 128.8, 127.0, 126.7, 124.9, 123.2, 117.5, 113.8, 75.2, 55.5, 49.2, 39.5, 37.5, 34.0, 33.5, 32.9, 29.8, 28.1, 25.7, 25.0, 24.9, 24.5, 22.8, 22.7, 22.2, 21.1, 20.7, 19.8, 13.1, 12.3, 12.0; HRMS (ESI, Q-TOF)  $m/z$   $[\text{M}+\text{H}]^+$  Calcd for  $\text{C}_{42}\text{H}_{66}\text{NO}_5$  664.4941, found  $[\text{M}+\text{H}]^+$  664.4933.

### 2-fluoro-N-(4-oxo-4-phenylbutyl)benzamide (4a)

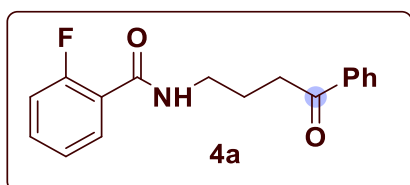

Overall yield: 40%, 17 mg; Nature: yellow solid;  $R_f = 0.5$  (Hexane/ethyl acetate = 40:60);  $^1\text{H NMR}$  (400 MHz, CHLOROFORM-D)  $\delta$  8.06 – 8.02 (m, 1H), 7.95 (dt,  $J = 8.7, 1.6$  Hz, 2H), 7.57 – 7.52 (m, 1H), 7.46 – 7.41 (m, 3H), 7.22 (dd,  $J = 7.6, 1.6$  Hz, 1H), 7.13 – 7.07 (m, 1H), 6.90 (s, 1H), 3.61 – 3.55 (m, 2H), 3.10 (t,  $J = 7.1$  Hz, 2H), 2.09 (p,  $J = 7.1$  Hz, 2H);  $^{13}\text{C}\{^1\text{H}\}$  NMR (100 MHz, CHLOROFORM-D)  $\delta$  199.8, 163.6, 161.9, 159.4, 136.7, 133.3 (d,  $J = 5.3$  Hz), 132.0, 128.7, 128.1, 124.8 (d,  $J = 3.8$  Hz), 121.2 (d,  $J = 11.5$  Hz), 116.2, 115.9, 39.7, 36.0, 23.9;  $^{19}\text{F}\{^1\text{H}\}$

**NMR** (376 MHz, CHLOROFORM-D)  $\delta$  -113.55. **HRMS** (ESI, Q-TOF)  $m/z$   $[M+H]^+$  Calcd for  $C_{17}H_{17}NO_2F$  286.1243, found  $[M+H]^+$  286.1241.

### 2-chloro-N-(4-oxo-4-phenylbutyl)benzamide (4b)

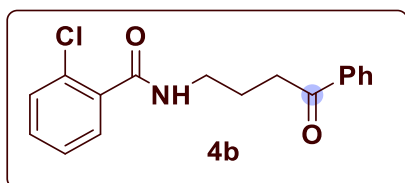

Overall yield: 47%, 21 mg; Nature: white solid;  $R_f$  = 0.5 (Hexane/ethyl acetate = 40:60);  **$^1H$  NMR** (400 MHz, CHLOROFORM-D)  $\delta$  7.97 – 7.94 (m, 2H), 7.57 – 7.55 (m, 2H), 7.45 (t,  $J$  = 7.8 Hz, 2H), 7.39 – 7.27 (m, 3H), 6.40 (s, 1H), 3.57 (q,  $J$  = 6.9 Hz, 2H), 3.13 (d,  $J$  = 6.9 Hz, 2H), 2.09 (p,  $J$  = 6.9 Hz, 2H);  **$^{13}C\{^1H\}$  NMR** (100 MHz, CHLOROFORM-D)  $\delta$  199.9, 166.9, 136.7, 135.4, 133.4, 131.3, 130.6, 130.3, 130.1, 128.8, 128.2, 127.2, 39.8, 36.1, 23.8; **HRMS** (ESI, Q-TOF)  $m/z$   $[M+H]^+$  Calcd for  $C_{17}H_{17}NO_2F$  302.0948, found  $[M+H]^+$  302.0926.

### 2-iodo-N-(4-oxo-4-phenylbutyl)benzamide (4c)

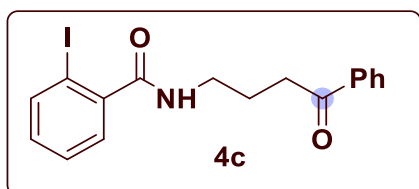

Overall yield: 45%, 26 mg; Nature: white solid;  $R_f$  = 0.5 (Hexane/ethyl acetate = 40:60);  **$^1H$  NMR** (400 MHz, CHLOROFORM-D)  $\delta$  7.97 – 7.94 (m, 2H), 7.57 – 7.55 (m, 2H), 7.45 (t,  $J$  = 7.8 Hz, 2H), 7.39 – 7.27 (m, 3H), 6.40 (s, 1H), 3.57 (q,  $J$  = 6.9 Hz, 2H), 3.13 (d,  $J$  = 6.9 Hz, 2H), 2.09 (p,  $J$  = 6.9 Hz, 2H);  **$^{13}C\{^1H\}$  NMR** (100 MHz, CHLOROFORM-D)  $\delta$  199.9, 166.9, 136.7, 135.4, 133.4, 131.3, 130.6, 130.3, 130.1, 128.8, 128.2, 127.2, 39.8, 36.1, 23.8; **HRMS** (ESI, Q-TOF)  $m/z$   $[M+H]^+$  Calcd for  $C_{17}H_{17}NO_2I$  394.0304, found  $[M+H]^+$  394.0297.

### 3-methyl-N-(4-oxo-4-phenylbutyl)benzamide (4d)

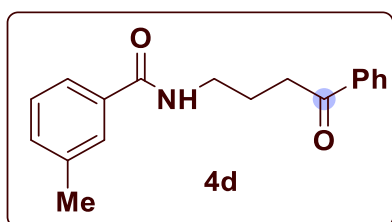

Overall yield: 68%, 28 mg; Nature: white solid;  $R_f$  = 0.5 (Hexane/ethyl acetate = 40:60);  **$^1H$  NMR** (400 MHz, CHLOROFORM-D)  $\delta$  7.96-7.94 (m, 2H), 7.58 – 7.51 (m, 3H), 7.46-7.42 (m, 2H), 7.31-7.26 (m, 2H), 6.58 (s, 1H), 3.54 (td,  $J$  = 7.2, 5.6 Hz, 2H), 3.12 (t,  $J$  = 6.9 Hz, 2H), 2.37 (s, 3H), 2.12 – 2.06 (m, 2H);  **$^{13}C\{^1H\}$  NMR** (100 MHz, CHLOROFORM-D)  $\delta$  200.5, 167.9, 138.5, 136.7, 134.6, 133.4, 132.2, 128.8, 128.5, 128.2, 127.8, 123.9, 40.0, 36.4, 23.6, 21.5; **HRMS** (ESI, Q-TOF)  $m/z$   $[M+Na]^+$  Calcd for  $C_{18}H_{19}NO_2Na$  304.1313, found  $[M+Na]^+$  304.1319.

### N-(4-oxo-4-phenylbutyl)benzamide (4e)

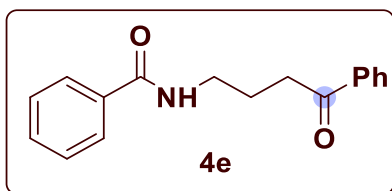

Overall yield: 62%, 24 mg; Nature: white solid;  $R_f = 0.5$  (Hexane/ethyl acetate = 40:60);  $^1\text{H NMR}$  (400 MHz, CHLOROFORM-D)  $\delta$  7.98 – 7.94 (m, 2H), 7.77-7.75 (m, 2H), 7.59-7.54 (m, 1H), 7.48 – 7.41 (m, 5H), 6.67 (s, 1H), 3.59 – 3.52 (m, 2H), 3.14 (t,  $J = 6.6$  Hz, 2H), 2.14-2.07 (m, 2H);  $^{13}\text{C}\{^1\text{H}\}$  NMR (100 MHz, CHLOROFORM-D)  $\delta$  200.7, 167.7, 136.7, 134.5, 133.5, 131.5, 130.2, 128.8, 128.2, 127.0, 40.1, 36.5, 23.5; HRMS (ESI, Q-TOF)  $m/z$   $[\text{M}+\text{H}]^+$  Calcd for  $\text{C}_{17}\text{H}_{18}\text{NO}_2$  268.1338, found  $[\text{M}+\text{H}]^+$  268.1335.

#### 4-methyl-N-(4-oxo-4-phenylbutyl)benzamide (4f)

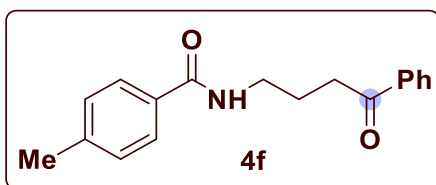

Overall yield: 72%, 30 mg; Nature: white solid;  $R_f = 0.5$  (Hexane/ethyl acetate = 40:60);  $^1\text{H NMR}$  (400 MHz, CHLOROFORM-D)  $\delta$  7.97 – 7.94 (m, 2H), 7.67 – 7.64 (m, 2H), 7.58-7.53 (m, 1H), 7.47-7.43 (m, 2H), 7.23 – 7.19 (m, 2H), 6.54 (s, 1H), 3.54 (td,  $J = 7.2, 6.0$  Hz, 2H), 3.13 (t,  $J = 6.6$  Hz, 2H), 2.38 (s, 3H), 2.13-2.06 (m,  $J = 6.4$  Hz, 2H);  $^{13}\text{C}\{^1\text{H}\}$  NMR (100 MHz, CHLOROFORM-D)  $\delta$  200.6, 167.6, 141.8, 136.8, 133.4, 131.7, 129.3, 128.8, 128.2, 126.9, 40.0, 36.5, 23.6, 21.5; HRMS (ESI, Q-TOF)  $m/z$   $[\text{M}+\text{H}]^+$  Calcd for  $\text{C}_{18}\text{H}_{20}\text{NO}_2$  282.1494, found  $[\text{M}+\text{H}]^+$  282.1500.

#### 4-methoxy-N-(4-oxo-4-phenylbutyl)benzamide (4g)

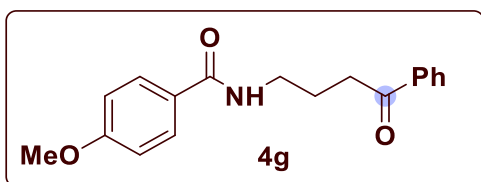

Overall yield: 75%, 33 mg; Nature: white solid;  $R_f = 0.45$  (Hexane/ethyl acetate = 40:60);  $^1\text{H NMR}$  (400 MHz, CHLOROFORM-D)  $\delta$  7.97-7.94 (m, 2H), 7.75 – 7.71 (m, 2H), 7.58 – 7.53 (m, 1H), 7.46-7.42 (m, 2H), 6.92 – 6.88 (m, 2H), 6.56 (s, 1H), 3.83 (s, 3H), 3.53 (td,  $J = 6.4, 6.0$  Hz, 2H), 3.13 (t,  $J = 6.6$  Hz, 2H), 2.12-2.05 (m, 2H);  $^{13}\text{C}\{^1\text{H}\}$  NMR (100 MHz, CHLOROFORM-D)  $\delta$  200.7, 165.9, 158.3, 136.7, 133.5, 132.3, 128.8, 128.2, 127.7, 111.3, 56.5, 40.2, 36.6, 23.4; HRMS (ESI, Q-TOF)  $m/z$   $[\text{M}+\text{H}]^+$  Calcd for  $\text{C}_{18}\text{H}_{20}\text{NO}_3$  298.1443, found  $[\text{M}+\text{H}]^+$  298.1429.

#### N-(4-oxo-4-phenylbutyl)-4-(trifluoromethyl)benzamide (4h)

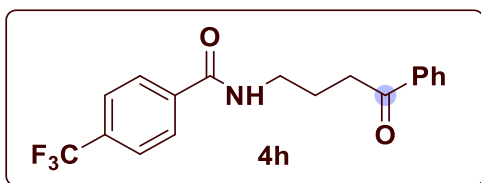

Overall yield: 20%, 10 mg; Nature: white solid;  $R_f = 0.5$  (Hexane/ethyl acetate = 40:60);  $^1\text{H NMR}$  (400 MHz, CHLOROFORM-D)  $\delta$  7.96 (dd,  $J = 8.2, 1.4$  Hz, 2H), 7.88 (d,  $J = 8.7$  Hz, 2H), 7.68 (d,  $J = 8.2$  Hz, 2H), 7.59 – 7.55 (m, 1H), 7.46 (t,  $J = 7.6$  Hz, 2H), 6.92 (s, 1H), 3.56 (td,  $J = 6.0, 5.5$  Hz, 2H), 3.17 (t,  $J = 6.4$  Hz, 2H), 2.16-2.09 (m,  $J = 6.6$  Hz, 2H);  $^{13}\text{C}\{^1\text{H}\}$  NMR (100 MHz, CHLOROFORM-D)  $\delta$  200.9, 166.3, 137.8, 136.6, 133.6, 133.3 (q,  $J = 32.5$  Hz),

128.8, 128.2, 127.5, 125.7, 125.7, 122.5(q,  $J=274$  Hz), 40.5, 36.7, 23.1;  $^{19}\text{F}\{^1\text{H}\}$  NMR (376 MHz, CHLOROFORM-D)  $\delta$  -63.38. HRMS (ESI, Q-TOF)  $m/z$   $[\text{M}+\text{H}]^+$  Calcd for  $\text{C}_{18}\text{H}_{17}\text{NO}_2\text{F}_3$  336.1211, found  $[\text{M}+\text{H}]^+$  336.1216.

### 3-methyl-2-nitro-N-(4-oxo-4-phenylbutyl)benzamide (4i)

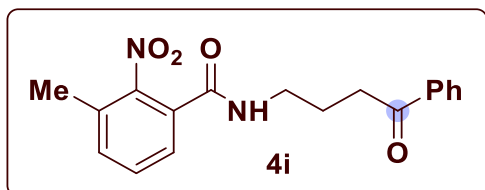

Overall yield: 40%, 19 mg; Nature: white solid;  $R_f = 0.4$  (Hexane/ethyl acetate = 40:60);  $^1\text{H}$  NMR (400 MHz, CHLOROFORM-D)  $\delta$  7.99-7.96 (m,  $J = 7.3, 1.6$  Hz, 2H), 7.58 – 7.53 (m, 1H), 7.47-7.42 (m, 2H), 7.41 – 7.34 (m, 3H), 6.46 (s, 1H), 3.51 (q,  $J = 6.2$  Hz, 2H), 3.13 (t,  $J = 6.9$  Hz, 2H), 2.35 (s, 3H), 2.05 (p,  $J = 6.9$  Hz, 2H);  $^{13}\text{C}\{^1\text{H}\}$  NMR (100 MHz, CHLOROFORM-D)  $\delta$  200.5, 165.5, 149.5, 136.7, 133.6, 133.4, 131.3, 130.6, 130.3, 128.8, 128.2, 125.6, 40.0, 36.1, 23.5, 17.8; HRMS (ESI, Q-TOF)  $m/z$   $[\text{M}+\text{H}]^+$  Calcd for  $\text{C}_{18}\text{H}_{19}\text{N}_2\text{O}_4$  327.1345, found  $[\text{M}+\text{H}]^+$  327.1324.

### 4-methoxy-N-(4-phenylbutyl-4-d)benzamide (2p')

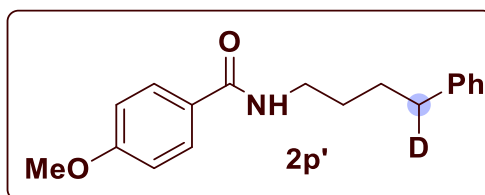

Overall yield: 50%, 21 mg; Nature: white solid;  $R_f = 0.5$  (Hexane/ethyl acetate = 60:40);  $^1\text{H}$  NMR (400 MHz, CHLOROFORM-D)  $\delta$  7.71 – 7.68 (m, 2H), 7.29 – 7.25 (m, 2H), 7.19-7.16 (m, 3H), 6.91 – 6.88 (m, 2H), 6.05 (s, 1H), 3.83 (s, 3H), 3.44 (q,  $J = 6.9$  Hz, 2H), 2.63 (t,  $J = 7.3$  Hz, 1H), 1.68 – 1.61 (m, 4H);  $^{13}\text{C}\{^1\text{H}\}$  NMR (100 MHz, CHLOROFORM-D)  $\delta$  167.1, 162.1, 142.2, 128.7, 128.5, 128.5, 127.1, 125.9, 113.8, 55.5, 39.9, 29.4, 28.8; HRMS (ESI, Q-TOF)  $m/z$   $[\text{M}+\text{H}]^+$  Calcd for  $\text{C}_{18}\text{H}_{21}\text{DNO}_2$  285.1708, found  $[\text{M}+\text{H}]^+$  285.1701.

### methyl 6-benzamidohexanoate-2-d (2l')

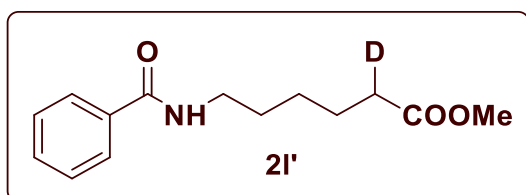

Overall yield: 32%, 12 mg; Nature: colorless oil;  $R_f = 0.5$  (Hexane/ethyl acetate = 50:50);  $^1\text{H}$  NMR (400 MHz, CHLOROFORM-D)  $\delta$  7.76-7.73 (m, 2H), 7.50-7.46 (m, 1H), 7.44 – 7.41 (m, 2H), 6.19 (s, 1H), 3.65 (s, 3H), 3.47 – 3.44 (m, 2H), 2.31 (t,  $J = 7.3$  Hz, 1H), 1.69 – 1.64 (m, 4H), 1.43 – 1.39 (m, 2H);  $^{13}\text{C}\{^1\text{H}\}$  NMR (100 MHz, CHLOROFORM-D)  $\delta$  174.3, 167.6, 134.8, 131.5, 128.7, 126.9, 51.7, 39.8, 29.4, 26.4, 24.4; HRMS (ESI, Q-TOF)  $m/z$   $[\text{M}+\text{H}]^+$  Calcd for  $\text{C}_{14}\text{H}_{19}\text{DNO}_3$  251.1506, found  $[\text{M}+\text{H}]^+$  251.1516.

### (2-bromoethene-1,1-diyl)dibenzene (2p'')

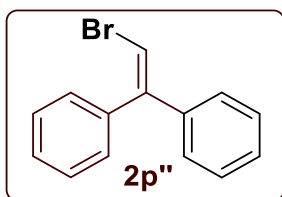

Overall yield: 25%, 9 mg; Nature: colorless oil;  $R_f = 0.5$  (Hexane);  $^1\text{H NMR}$  (400 MHz, CHLOROFORM-D)  $\delta$  7.41 – 7.36 (m, 3H), 7.31 – 7.27 (m, 5H), 7.21– 7.19 (m, 2H), 6.77 (s, 1H);  $^{13}\text{C}\{^1\text{H}\}$  NMR (100 MHz, CHLOROFORM-D)  $\delta$  146.9, 140.8, 139.1, 129.7, 128.3, 128.2, 128.0, 127.7, 105.2; **HRMS** (ESI, Q-TOF)  $m/z$   $[\text{M}+\text{H}]^+$  Calcd for  $\text{C}_{14}\text{H}_{12}\text{Br}$  259.0122, found  $[\text{M}+\text{H}]^+$  259.0117.

#### (S)-5-((phenylamino)methyl)dihydrofuran-2(3H)-one (5a)

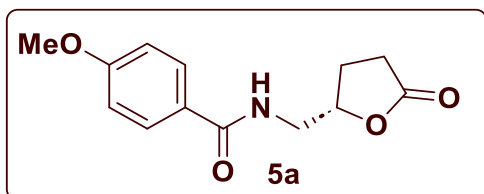

Overall yield: 75%, 21 mg; Nature: white solid;  $R_f = 0.5$  (Hexane/ethyl acetate = 20:80);  $^1\text{H NMR}$  (400 MHz, CHLOROFORM-D)  $\delta$  7.74 (d,  $J = 9.2$  Hz, 2H), 6.92 (d,  $J = 8.7$  Hz, 2H), 6.51 (s, 1H), 4.72 (tt,  $J = 7.3, 3.7$  Hz, 1H), 3.93 (ddd,  $J = 14.7, 6.9, 3.2$  Hz, 1H), 3.84 (s, 3H), 3.51 (ddd,  $J = 14.7, 7.1, 5.3$  Hz, 1H), 2.59 – 2.54 (m, 2H), 2.40-2.31 (m, 1H), 2.06-1.96 (m, 1H);  $^{13}\text{C}\{^1\text{H}\}$  NMR (100 MHz, CHLOROFORM-D)  $\delta$  177.0, 167.4, 162.6, 129.0, 114.0, 79.8, 55.6, 43.4, 28.7, 24.9; **HRMS** (ESI, Q-TOF)  $m/z$   $[\text{M}+\text{H}]^+$  Calcd for  $\text{C}_{12}\text{H}_{16}\text{NO}_3$  222.1130, found  $[\text{M}+\text{H}]^+$  222.1117.

#### N-(4-hydroxy-4-phenylbutyl)-4-methoxybenzamide (4ga)

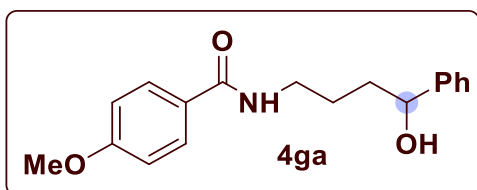

Overall yield: 80%, 31 mg; Nature: white solid;  $R_f = 0.5$  (Hexane/ethyl acetate = 40:60);  $^1\text{H NMR}$  (400 MHz, CHLOROFORM-D)  $\delta$  7.71 – 7.67 (m, 2H), 7.31 (d,  $J = 4.1$  Hz, 4H), 7.25 – 7.22 (m, 1H), 6.87 – 6.84 (m, 2H), 6.55 (t,  $J = 5.7$  Hz, 1H), 4.70 (dd,  $J = 7.8, 5.0$  Hz, 1H), 3.80 (s, 3H), 3.47 – 3.35 (m, 2H), 1.82 – 1.63 (m, 4H);  $^{13}\text{C}\{^1\text{H}\}$  NMR (100 MHz, CHLOROFORM-D)  $\delta$  167.4, 162.1, 144.8, 128.8, 128.6, 127.6, 126.9, 125.9, 113.8, 74.2, 55.5, 39.9, 36.3, 26.1; **HRMS** (ESI, Q-TOF)  $m/z$   $[\text{M}+\text{H}]^+$  Calcd for  $\text{C}_{18}\text{H}_{22}\text{NO}_3$  300.1600, found  $[\text{M}+\text{H}]^+$  300.1582.

#### 4-methoxy-N-(4-(2-nitrophenoxy)-4-phenylbutyl)benzamide (4gb)

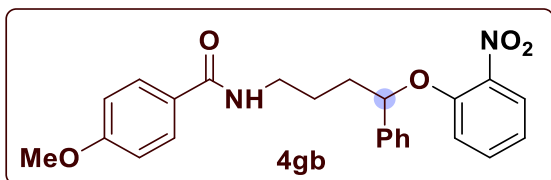

Overall yield: 60%, 22 mg; Nature: yellow oil;  $R_f = 0.5$  (Hexane/ethyl acetate = 60:40);  $^1\text{H NMR}$  (400 MHz, CHLOROFORM-D)  $\delta$  7.76 (dd,  $J = 8.2, 1.8$  Hz, 1H), 7.73 – 7.70 (m, 2H), 7.33 (d,  $J = 3.2$  Hz, 3H), 7.30 – 7.27 (m, 2H), 7.26 (d,  $J = 1.8$  Hz, 1H), 6.91 – 6.88 (m, 3H), 6.83 (d,  $J = 8.7$  Hz, 1H), 6.24 (t,  $J = 6.0$  Hz, 1H), 5.34 (dd,  $J = 8.0, 4.4$  Hz, 1H), 3.83 (s, 3H), 3.55 – 3.43 (m, 2H), 2.10 (dd,  $J = 14.2, 6.9$  Hz, 1H), 2.00 – 1.92 (m, 1H), 1.86 – 1.79 (m, 2H);  $^{13}\text{C}\{^1\text{H}\}$  NMR (100 MHz, CHLOROFORM-D)  $\delta$  167.3, 162.2, 151.3, 140.3, 133.9, 129.0, 128.8, 128.2, 126.9, 125.9, 125.5,

120.3, 116.1, 113.8, 81.2, 55.5, 39.4, 35.6, 25.7; **HRMS** (ESI, Q-TOF)  $m/z$   $[M+H]^+$  Calcd for  $C_{24}H_{25}N_2O_5$  421.1763, found  $[M+H]^+$  421.1741.

#### 4-methoxy-N-(3-phenylpropanoyl)benzamide (6a)

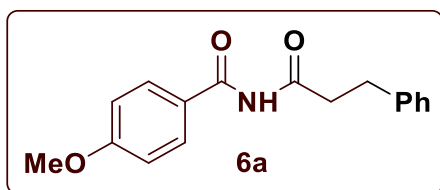

Overall yield: 68%, 38 mg; Nature: white solid;  $R_f = 0.5$  (Hexane/ethyl acetate = 50:50);  $^1H$  NMR (400 MHz, CHLOROFORM-D)  $\delta$  8.72 (s, 1H), 7.82 – 7.79 (m, 2H), 7.30 – 7.25 (m, 4H), 7.22-7.17 (m, 1H), 6.97 – 6.94 (m, 2H), 3.86 (s, 3H), 3.32 (t,  $J = 7.6$  Hz, 2H), 3.03 (t,  $J = 7.8$  Hz, 2H);  $^{13}C\{^1H\}$  NMR (100 MHz, CHLOROFORM-D)  $\delta$  175.6, 164.9, 163.7, 140.8, 129.9, 128.6, 128.6, 126.3, 124.8, 114.3, 55.7, 39.3, 30.2; **HRMS** (ESI, Q-TOF)  $m/z$   $[M+Na]^+$  Calcd for  $C_{17}H_{17}NO_3Na$  306.1106, found  $[M+Na]^+$  306.1095.

#### 4-methoxy-N'-(4-methoxyphenyl)-N-(4-phenylbutyl)benzimidamide (2pa)

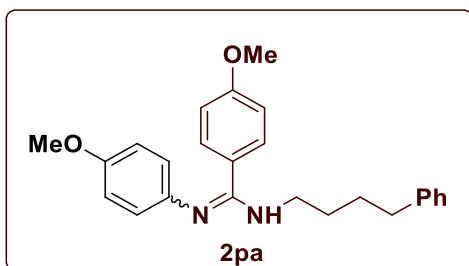

Overall yield: 72%, 29 mg; Nature: yellow oil;  $R_f = 0.5$  (Hexane/ethyl acetate = 20:80);  $^1H$  NMR (400 MHz, CHLOROFORM-D)  $\delta$  7.30 – 7.25 (m, 3H), 7.19 (d,  $J = 7.3$  Hz, 2H), 7.11 (d,  $J = 8.7$  Hz, 2H), 6.72 (d,  $J = 8.2$  Hz, 2H), 6.62 (d,  $J = 8.2$  Hz, 2H), 6.54 (d,  $J = 8.7$  Hz, 2H), 4.39 (br s, 1H), 3.74 (s, 3H), 3.68 (s, 3H), 3.53 – 3.44 (m, 2H), 2.68 (t,  $J = 7.3$  Hz, 3H), 1.78-1.66 (m,  $J = 14.7, 7.6$  Hz, 4H);  $^{13}C\{^1H\}$  NMR (100 MHz, CHLOROFORM-D)  $\delta$  159.9, 157.5, 154.3, 144.7, 142.4, 130.2, 128.5, 128.4, 128.2, 125.9, 123.9, 113.8, 113.7, 55.4, 55.3, 41.8, 35.7, 29.8, 29.0; **HRMS** (ESI, Q-TOF)  $m/z$   $[M+H]^+$  Calcd for  $C_{25}H_{29}N_2O_2$  389.2229, found  $[M+H]^+$  389.2250.

#### 4-methoxy-N-(4-phenylbutyl)benzothioamide (2pb)

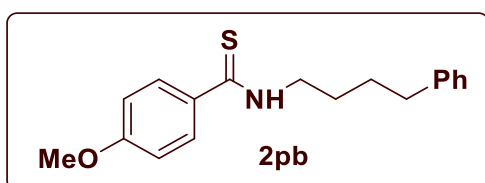

Overall yield: 79%, 26 mg; Nature: yellow solid;  $R_f = 0.5$  (Hexane/ethyl acetate = 70:30);  $^1H$  NMR (400 MHz, CHLOROFORM-D)  $\delta$  7.72 – 7.69 (m, 2H), 7.47 (s, 1H), 7.30 – 7.25 (m, 2H), 7.21 – 7.17 (m, 3H), 6.87 – 6.82 (m, 2H), 3.84-3.80 (d,  $J = 7.3$  Hz, 2H), 3.82 (s, 3H), 2.70 – 2.66 (m, 2H), 1.77-1.74 (m, 4H);  $^{13}C\{^1H\}$  NMR (100 MHz, CHLOROFORM-D)  $\delta$  198.1, 162.2, 141.9, 134.3, 128.5, 126.1, 113.7, 55.6, 46.7, 35.5, 28.9, 27.9; **HRMS** (ESI, Q-TOF)  $m/z$   $[M+H]^+$  Calcd for  $C_{18}H_{22}NOS$  300.1422, found  $[M+H]^+$  300.1420.

#### N-(3-bromo-4-oxo-4-phenylbutyl)-4-methoxybenzamide (4g')

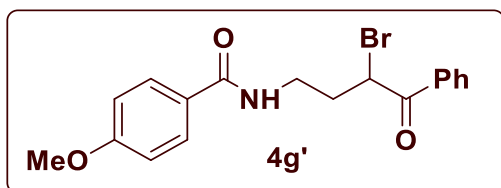

Overall yield: 60%, 22 mg; Nature: white solid;  $R_f = 0.5$  (Hexane/ethyl acetate = 70:30);  $^1\text{H}$  NMR (400 MHz, CHLOROFORM-D)  $\delta$  7.99 (dd,  $J = 6.6, 1.6$  Hz, 2H), 7.86–7.81 (m, 2H), 7.65–7.60 (m, 1H), 7.54–7.50 (m, 2H), 6.85 (dd,  $J = 8.9, 2.5$  Hz, 2H), 5.67 (dd,  $J = 7.1, 4.4$  Hz, 1H), 3.90 (s, 3H), 3.65–3.56 (m, 2H), 2.32–2.26 (m, 1H), 2.17–2.11 (m, 1H);  $^{13}\text{C}\{^1\text{H}\}$  NMR (100 MHz, CHLOROFORM-D)  $\delta$  195.5, 157.7, 153.3, 134.0, 132.3, 129.0, 128.8, 127.7, 113.4, 111.0, 56.3, 40.9, 29.7, 23.8; HRMS (ESI, Q-TOF)  $m/z$   $[M+H]^+$  Calcd for  $\text{C}_{18}\text{H}_{19}\text{NO}_3\text{Br}$  376.0548, found  $[M+H]^+$  376.0546.

## K. Copies of NMR spectra of compounds and HRMS of intermediates

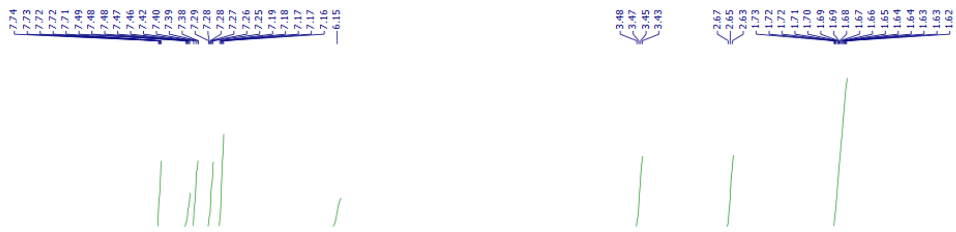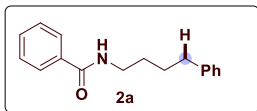

**$^1\text{H}$  NMR (400 MHz,  $\text{CDCl}_3$ ) of 2a**

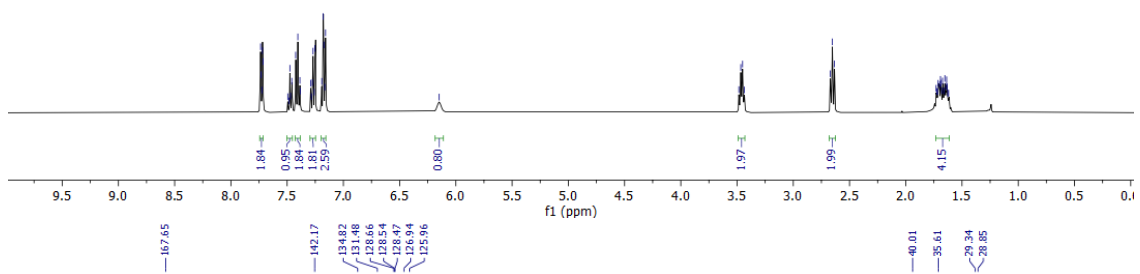

**$^{13}\text{C}\{^1\text{H}\}$  NMR (100 MHz,  $\text{CDCl}_3$ ) of 2a**

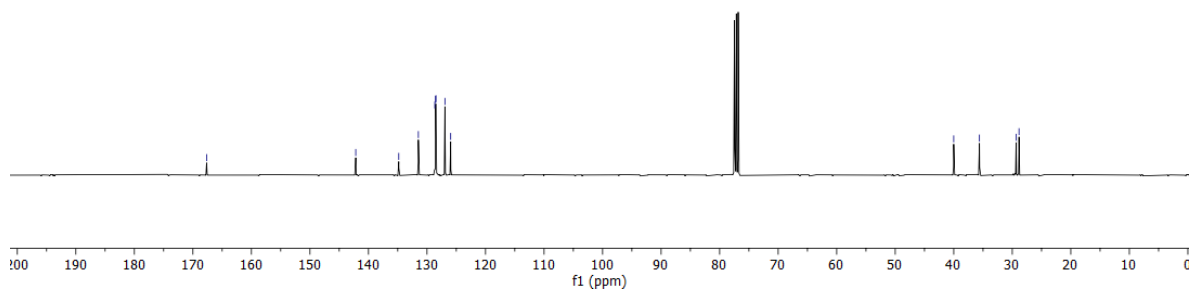

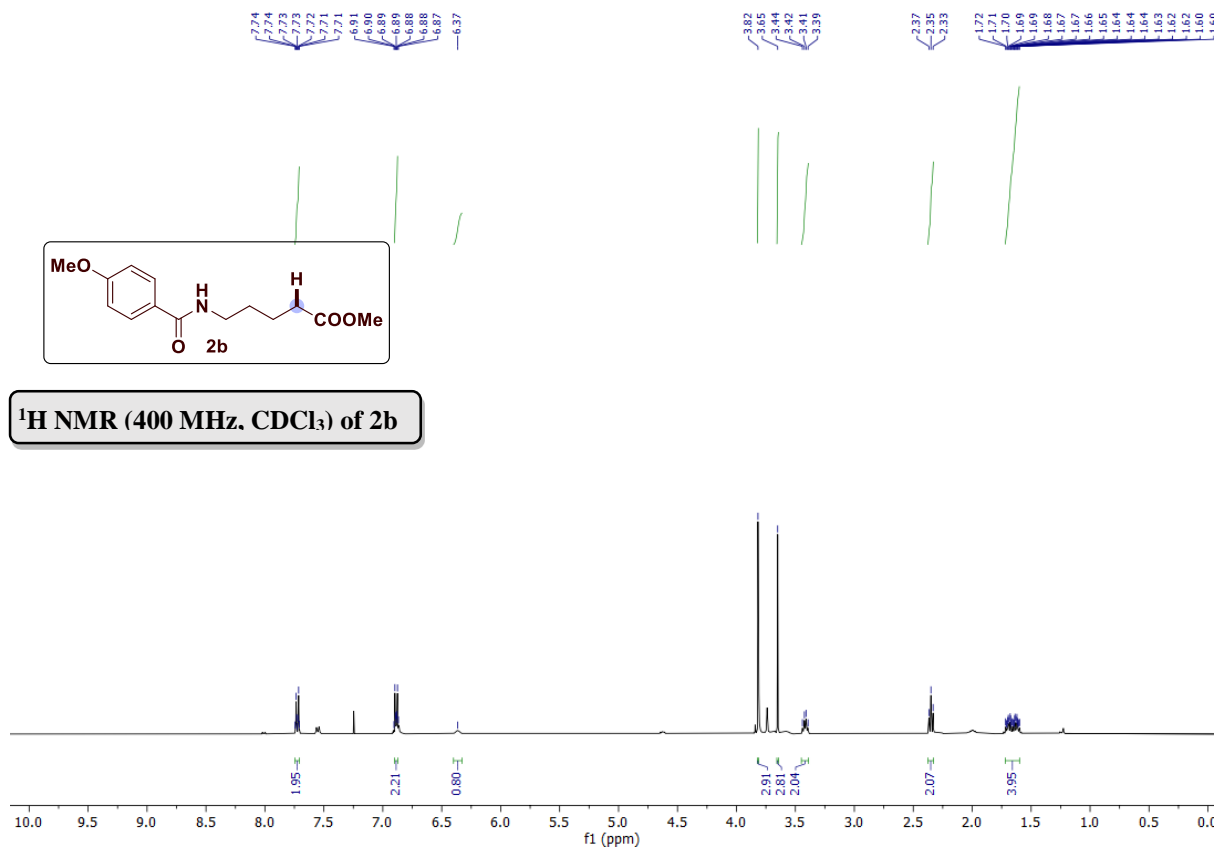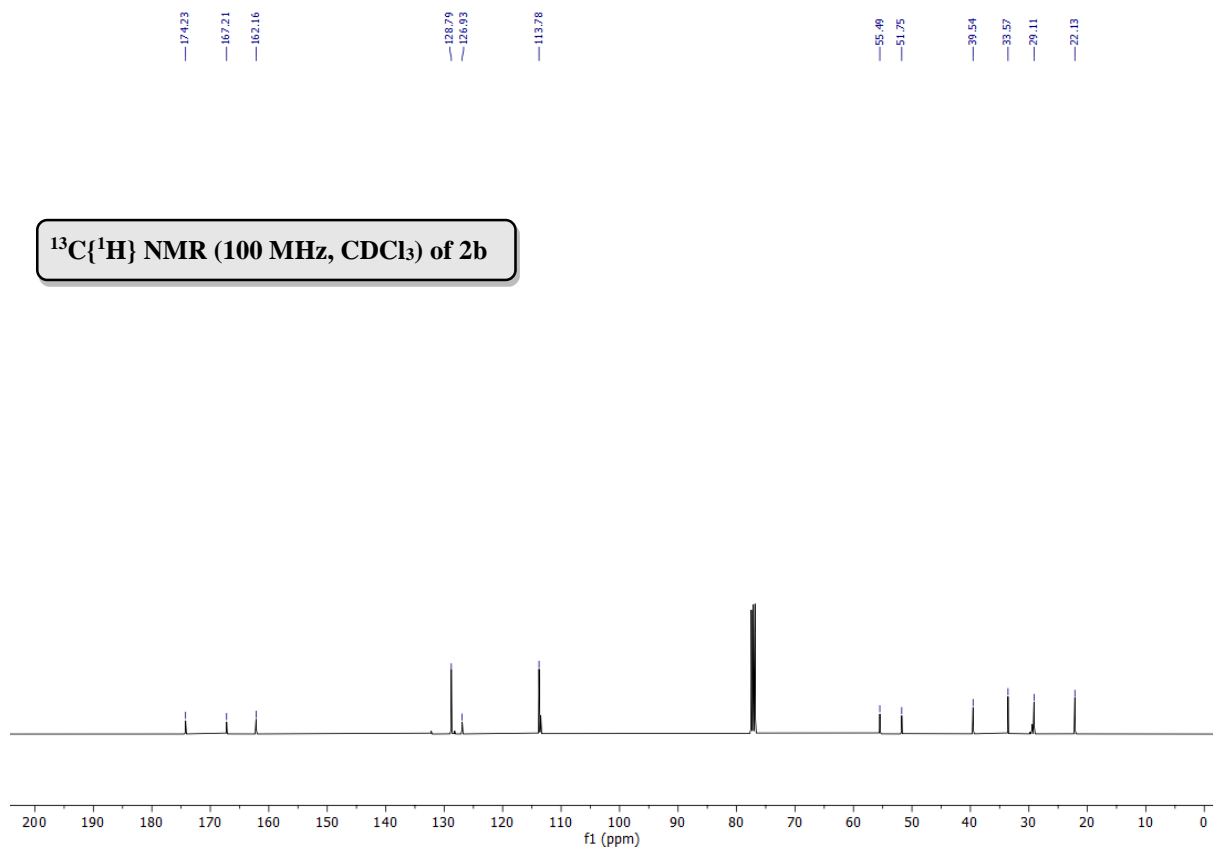

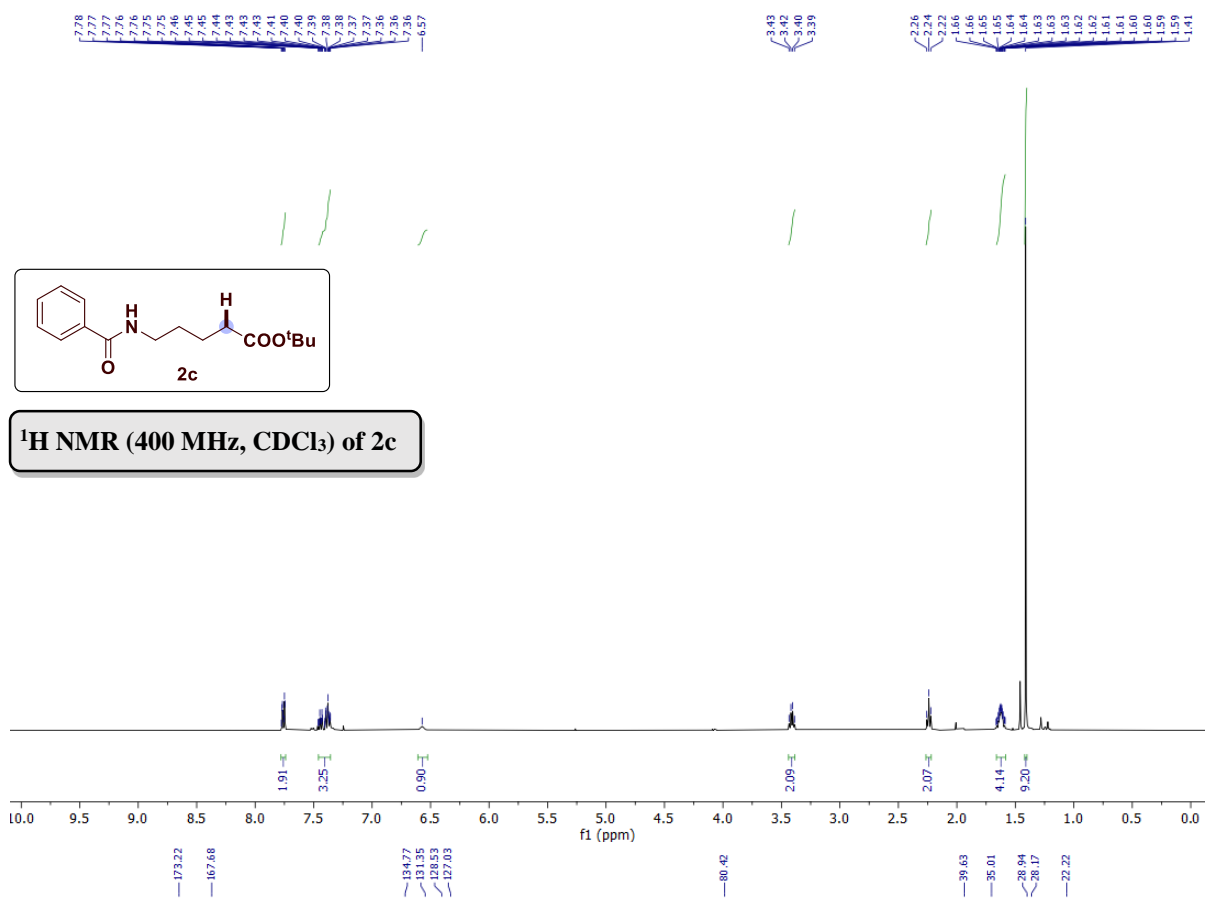

**<sup>13</sup>C{<sup>1</sup>H} NMR (100 MHz, CDCl<sub>3</sub>) of 2c**

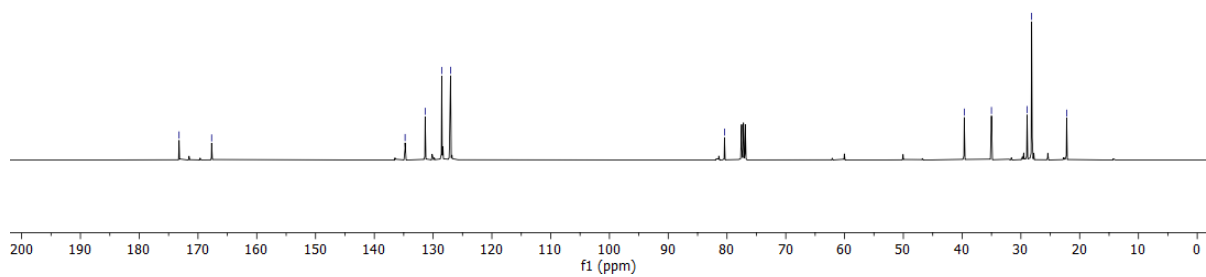

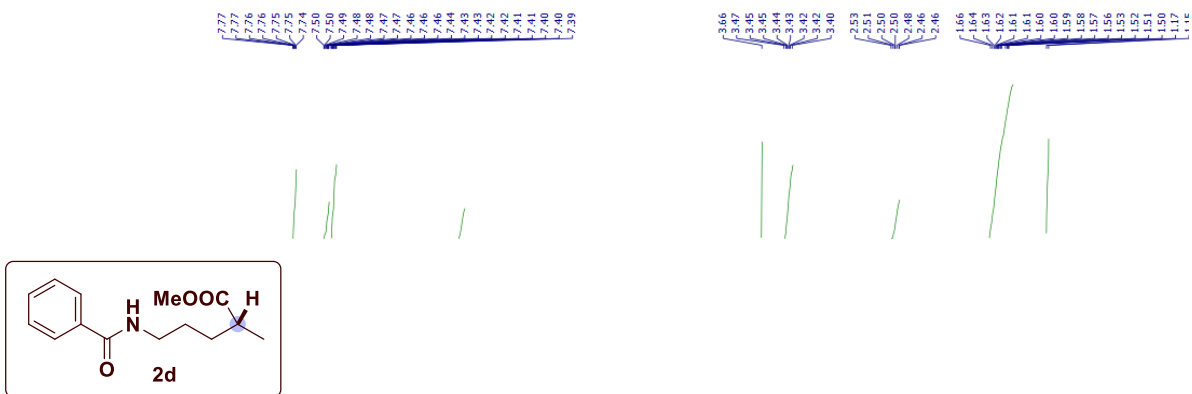

**<sup>1</sup>H NMR (400 MHz, CDCl<sub>3</sub>) of 2d**

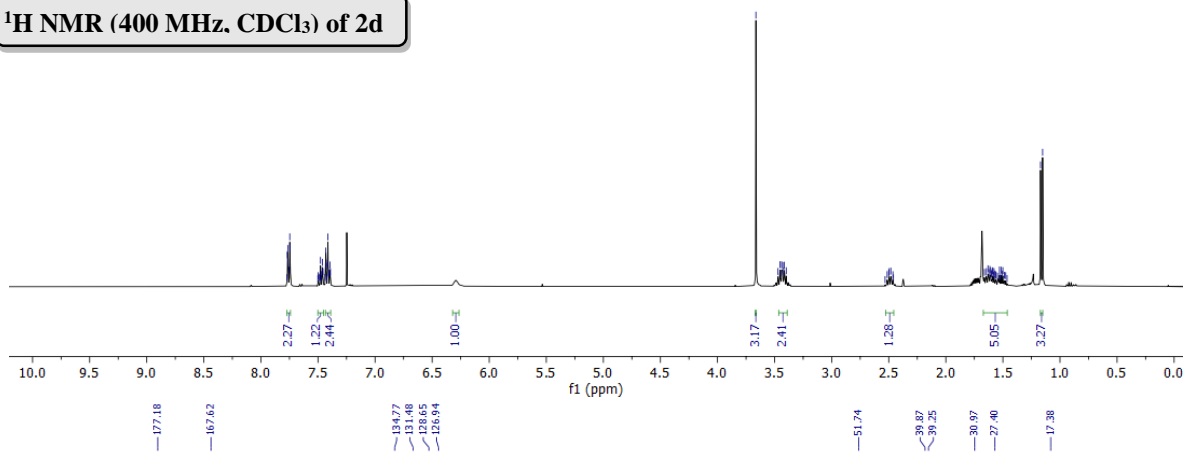

**<sup>13</sup>C{<sup>1</sup>H} NMR (100 MHz, CDCl<sub>3</sub>) of 2d**

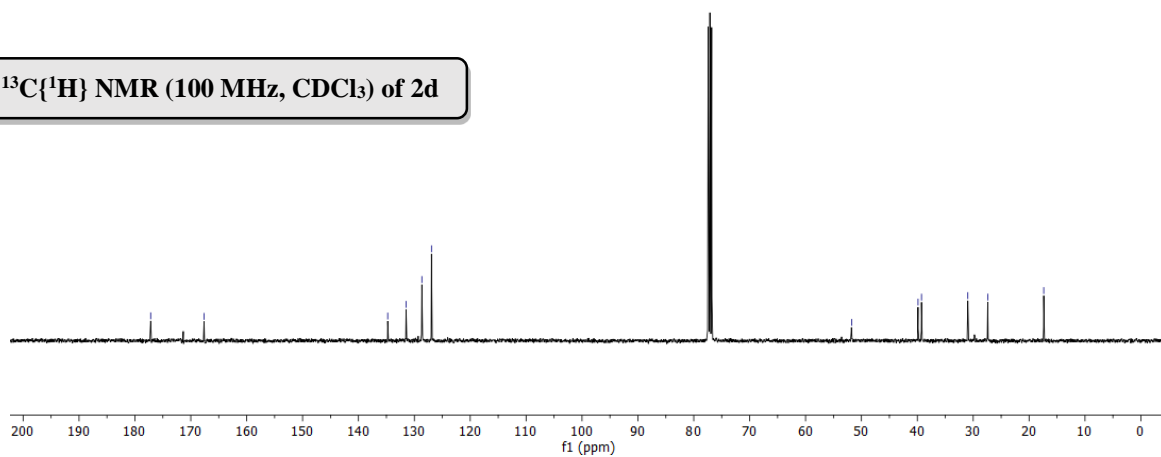

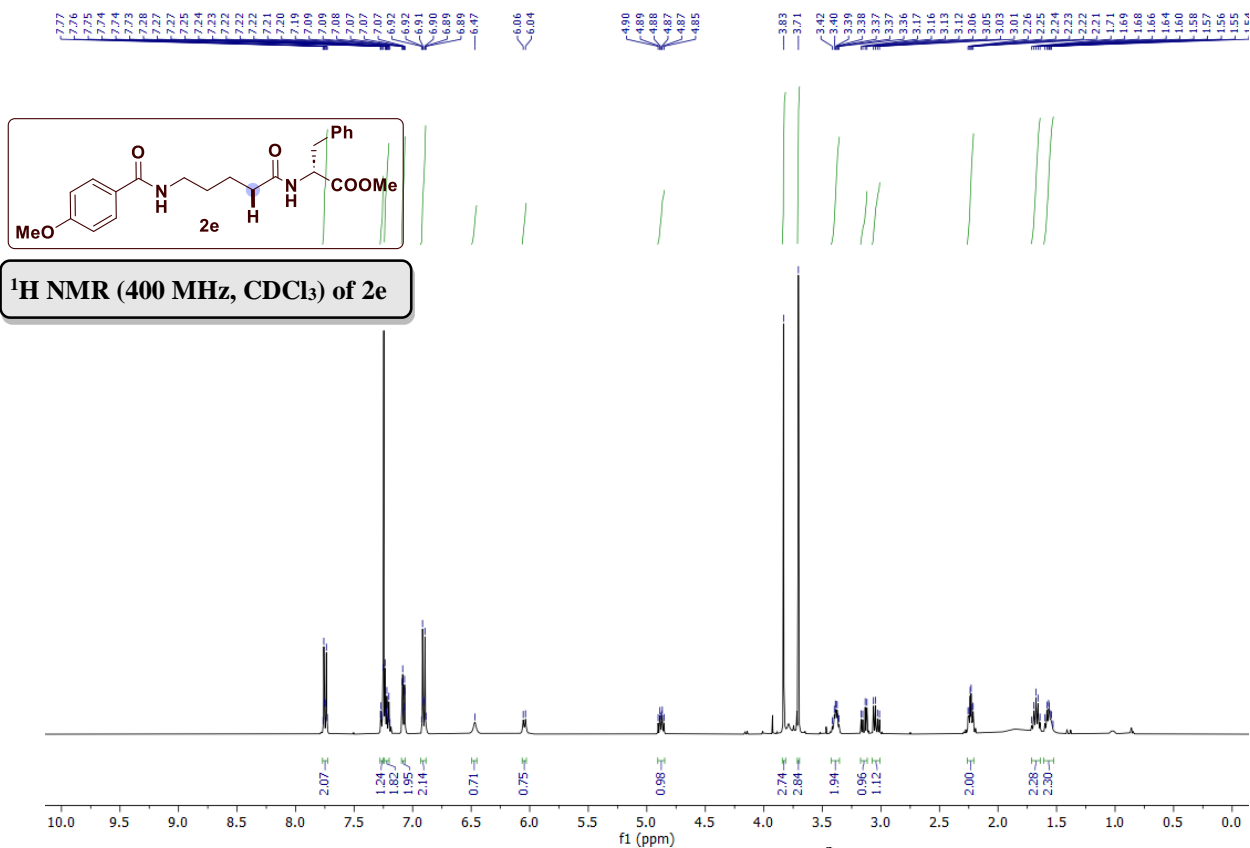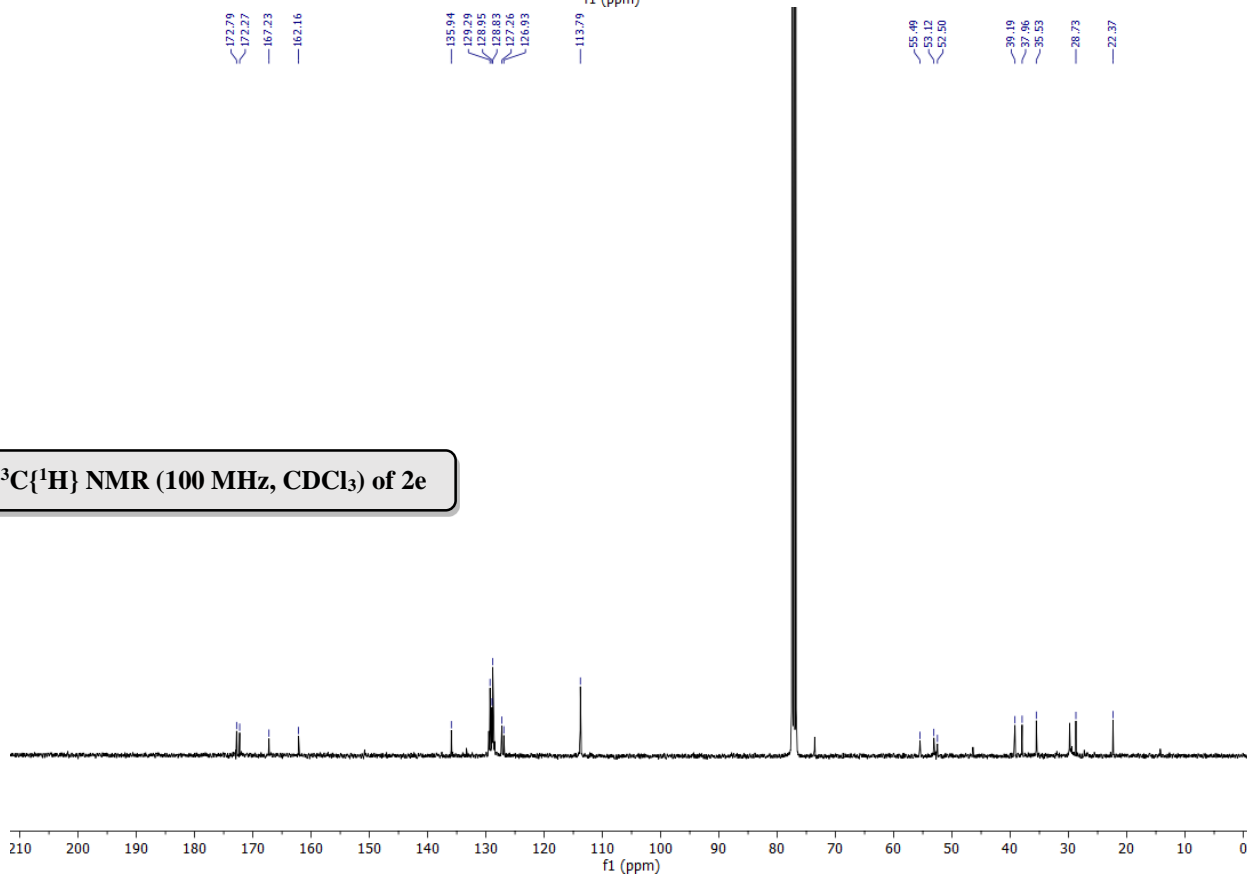

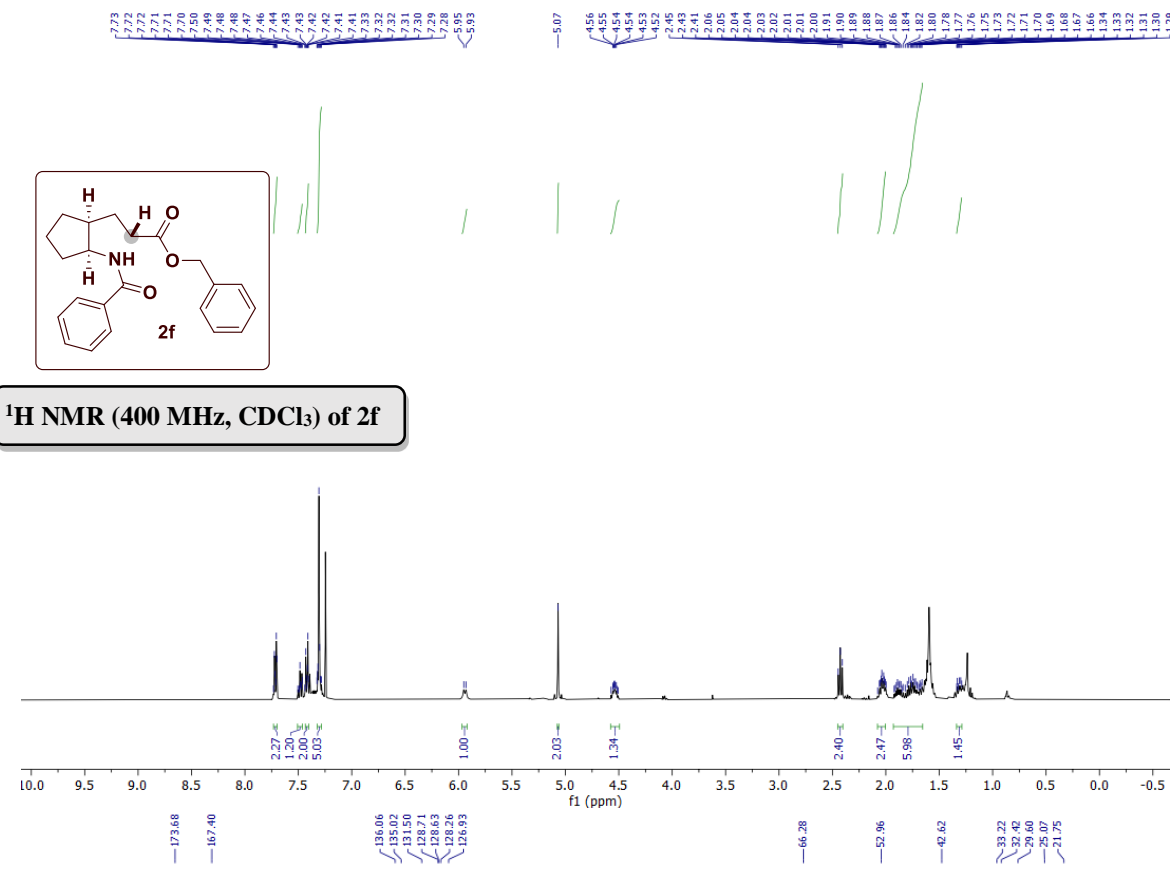

**<sup>13</sup>C{<sup>1</sup>H} NMR (100 MHz, CDCl<sub>3</sub>) of 2f**

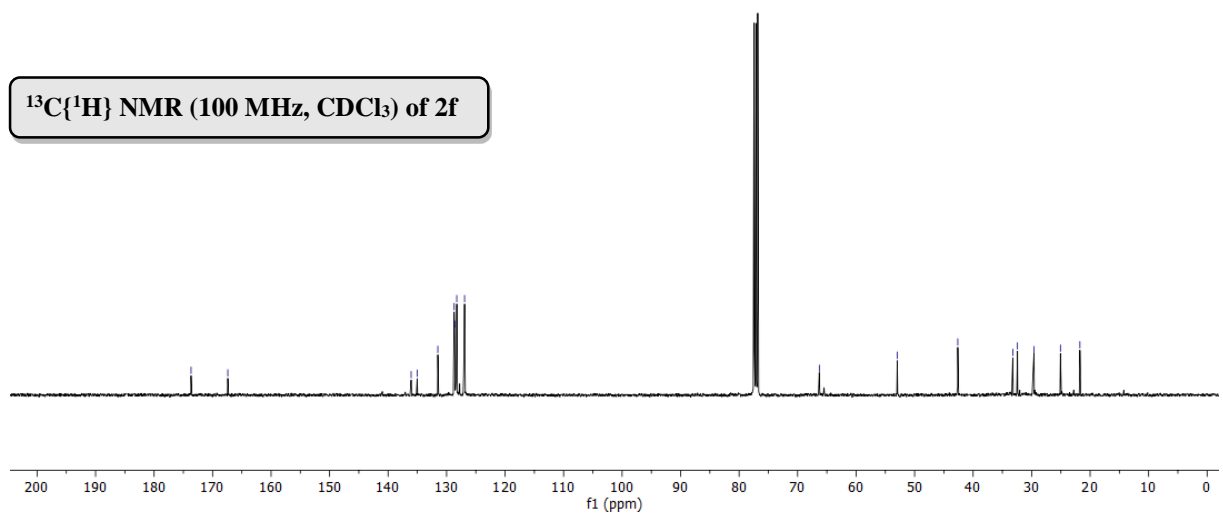

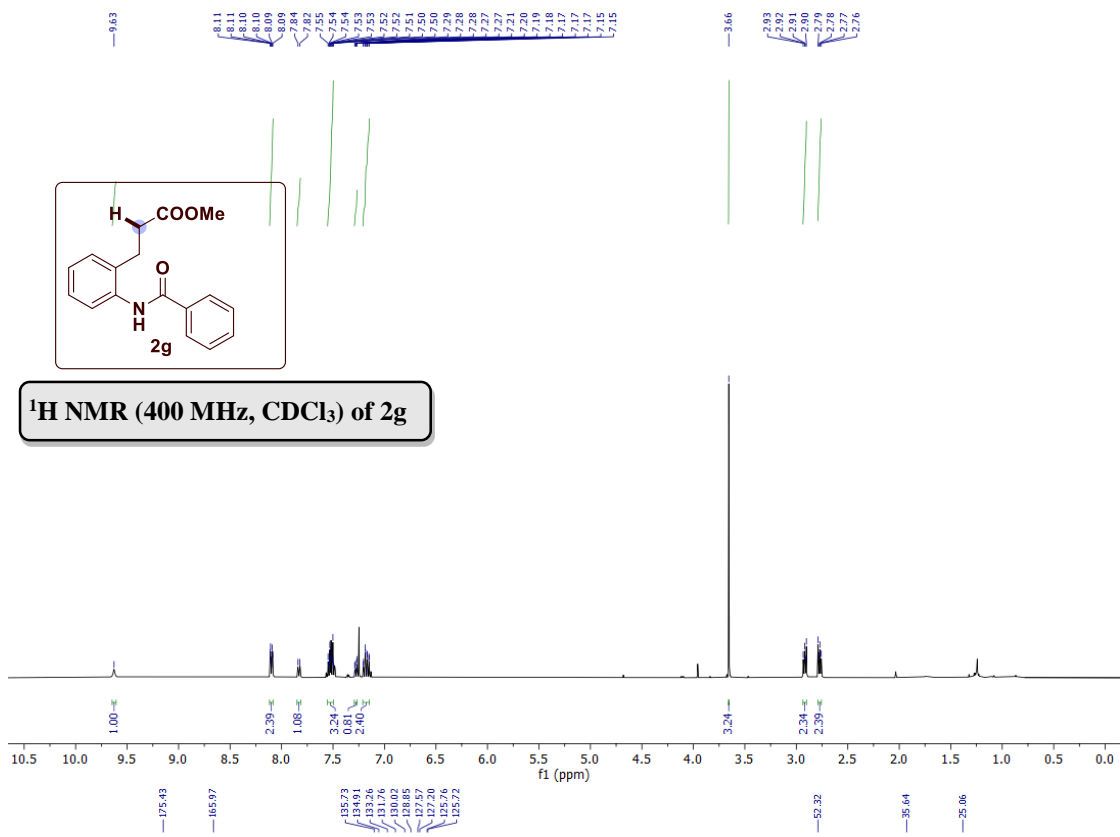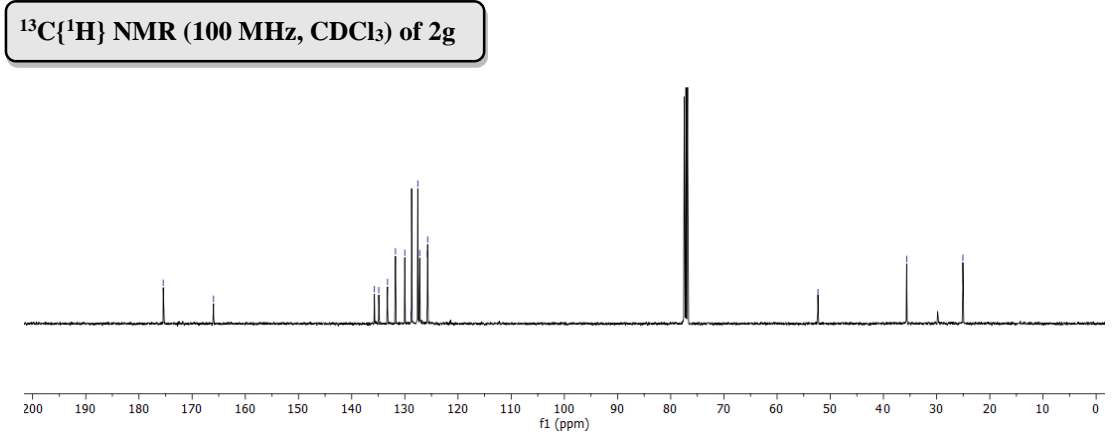

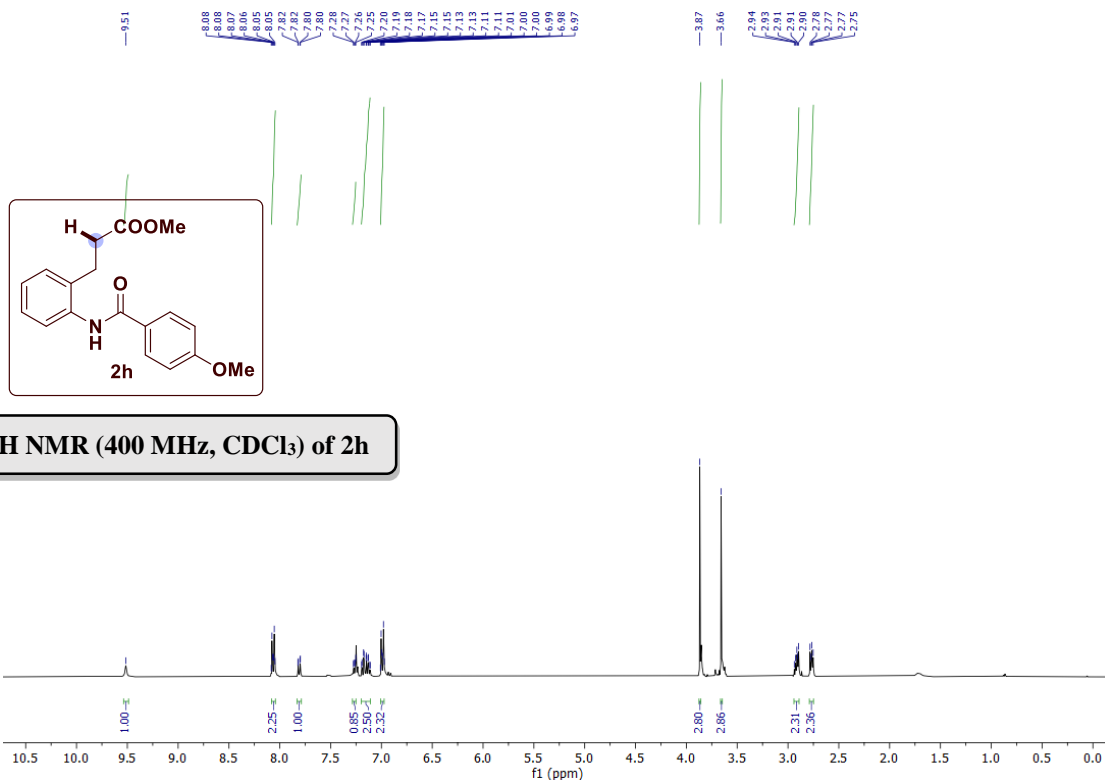

**<sup>13</sup>C{<sup>1</sup>H} NMR (100 MHz, CDCl<sub>3</sub>) of 2h**

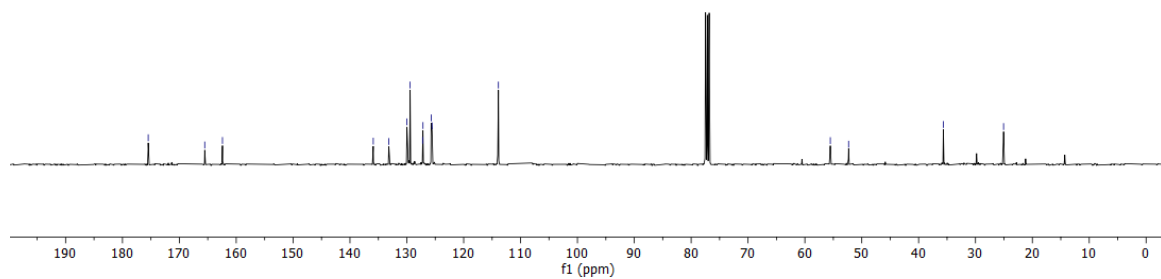

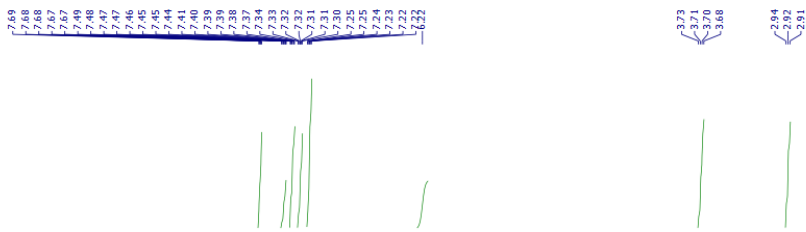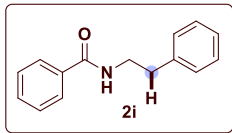

**<sup>1</sup>H NMR (400 MHz, CDCl<sub>3</sub>) of 2i**

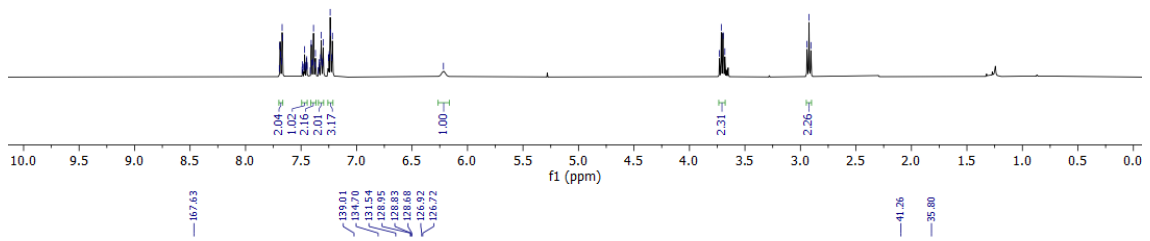

**<sup>13</sup>C{<sup>1</sup>H} NMR (100 MHz, CDCl<sub>3</sub>) of 2i**

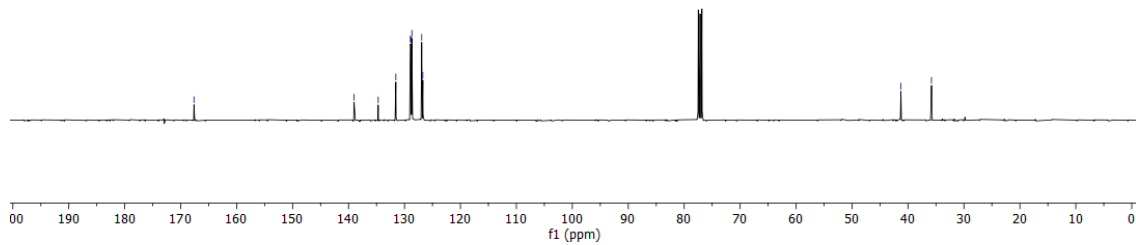

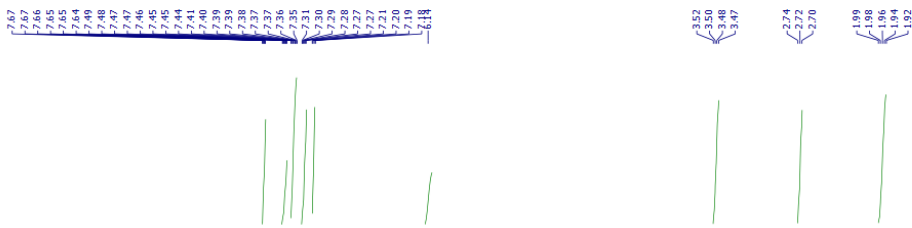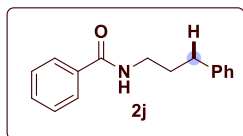

**$^1\text{H}$  NMR (400 MHz,  $\text{CDCl}_3$ ) of 2j**

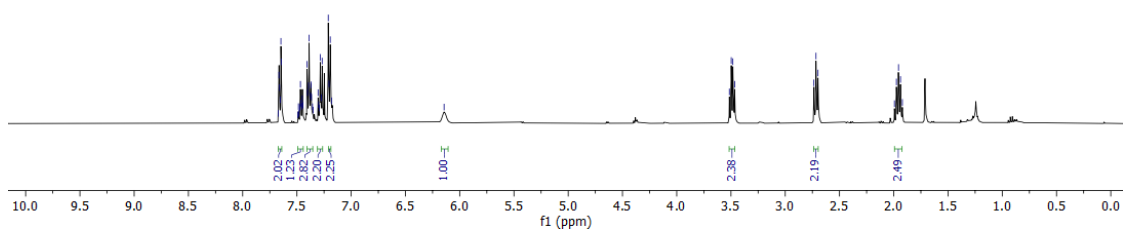

**$^{13}\text{C}\{^1\text{H}\}$  NMR (100 MHz,  $\text{CDCl}_3$ ) of 2j**

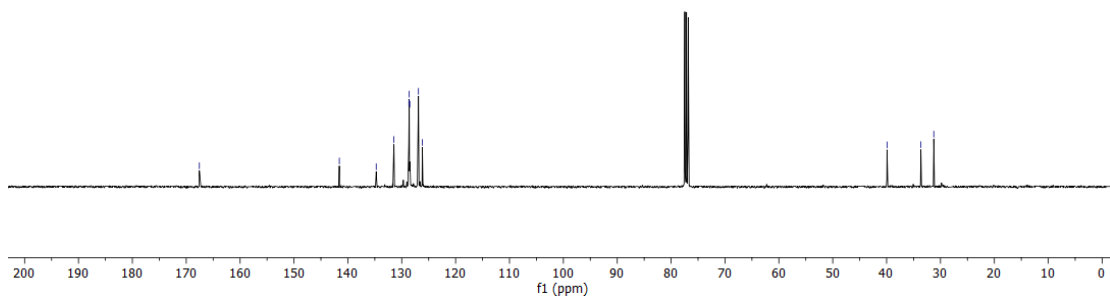

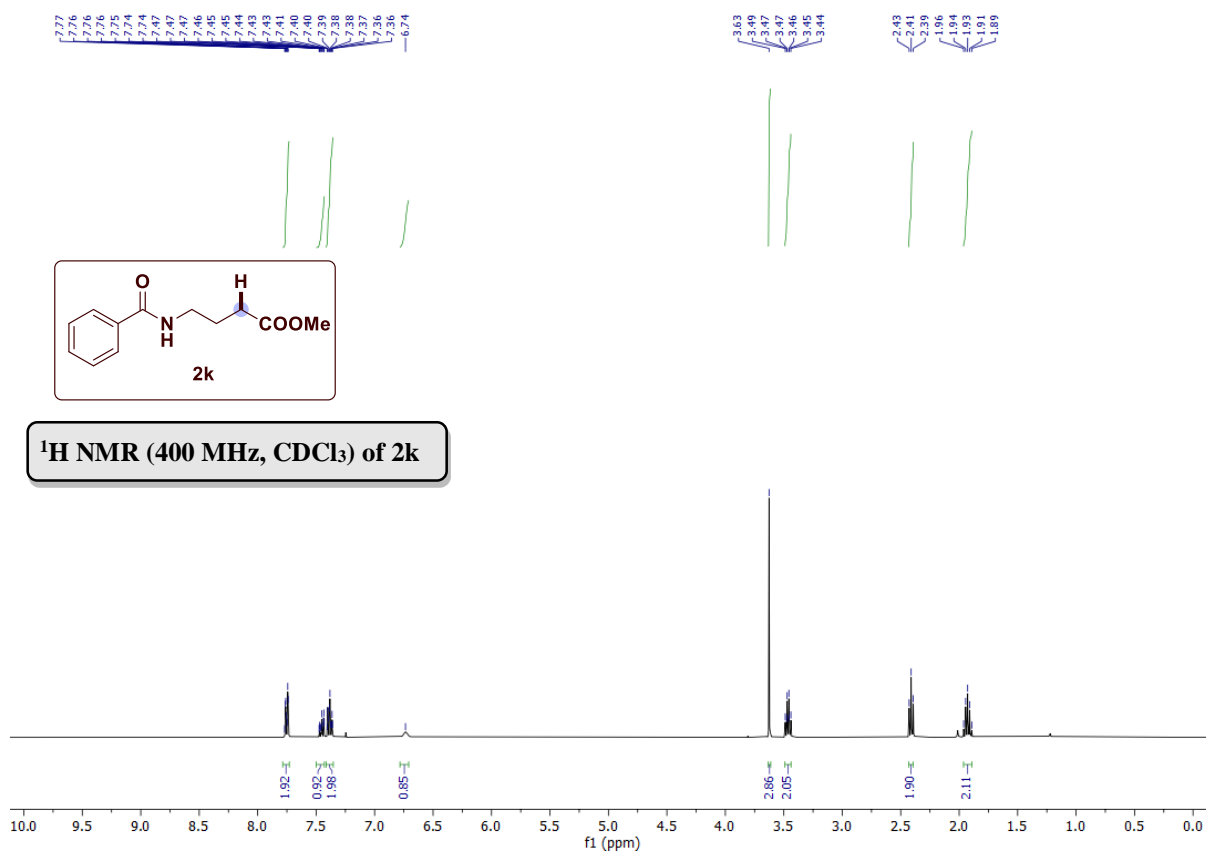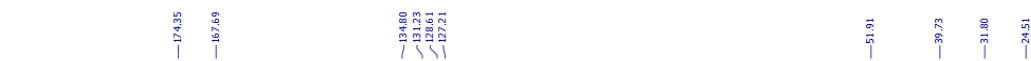

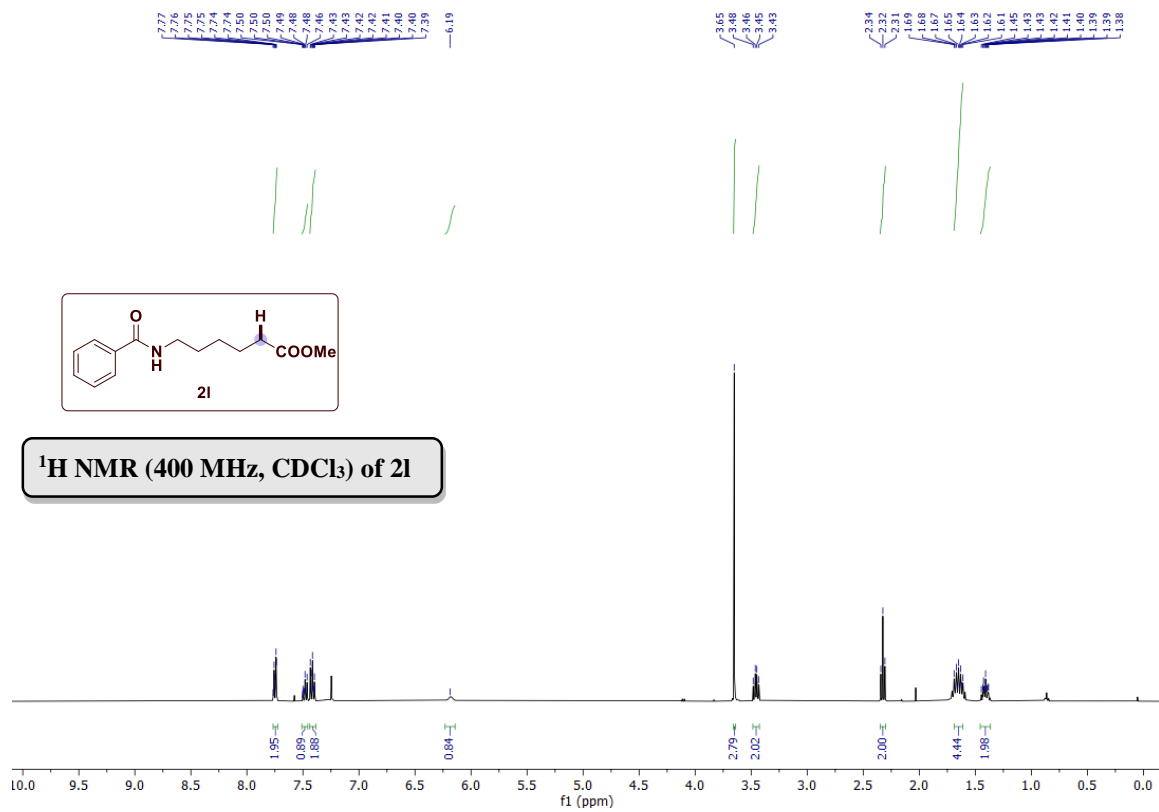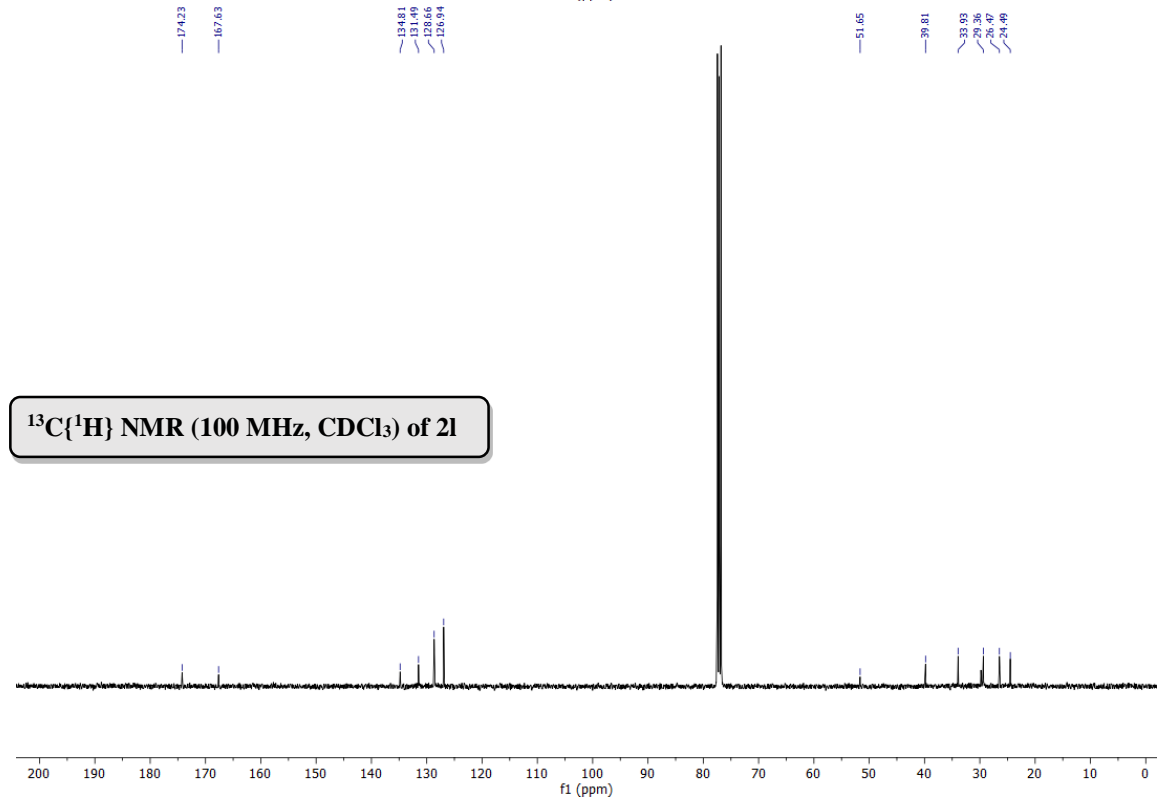

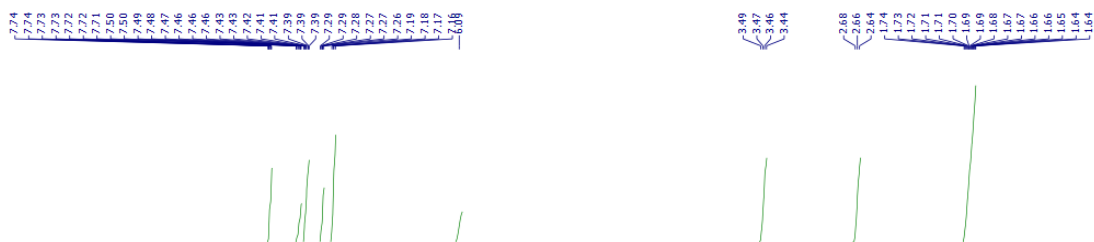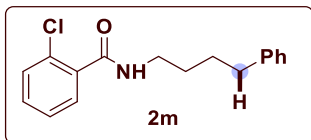

**$^1\text{H}$  NMR (400 MHz,  $\text{CDCl}_3$ ) of 2m**

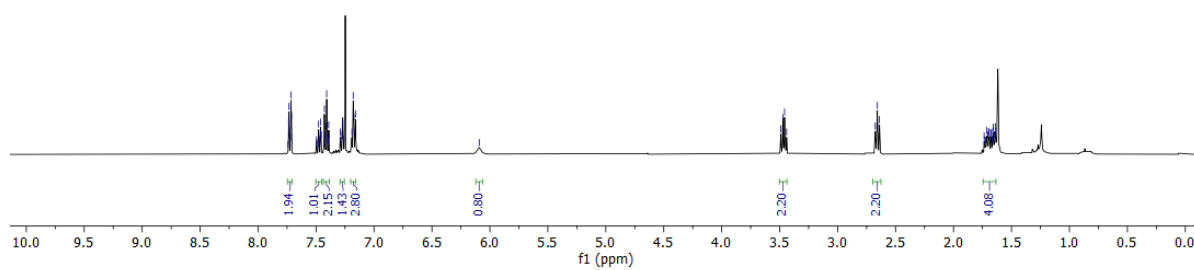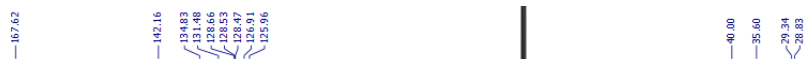

**$^{13}\text{C}\{^1\text{H}\}$  NMR (100 MHz,  $\text{CDCl}_3$ ) of 2m**

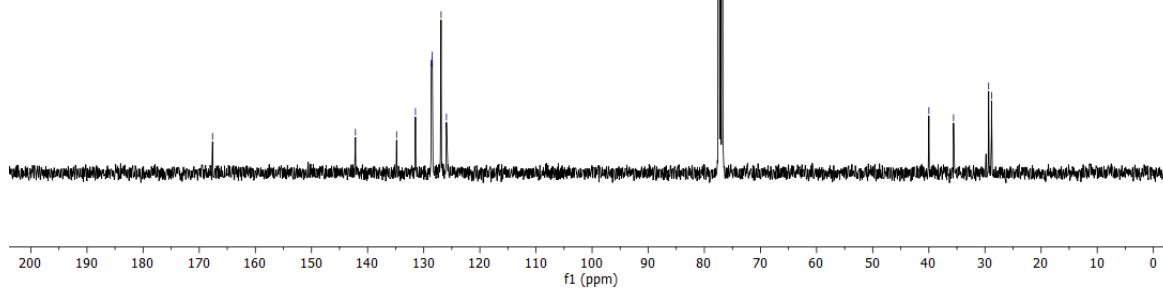

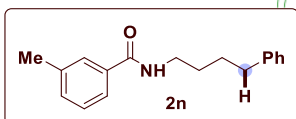

**$^1\text{H}$  NMR (400 MHz,  $\text{CDCl}_3$ ) of 2n**

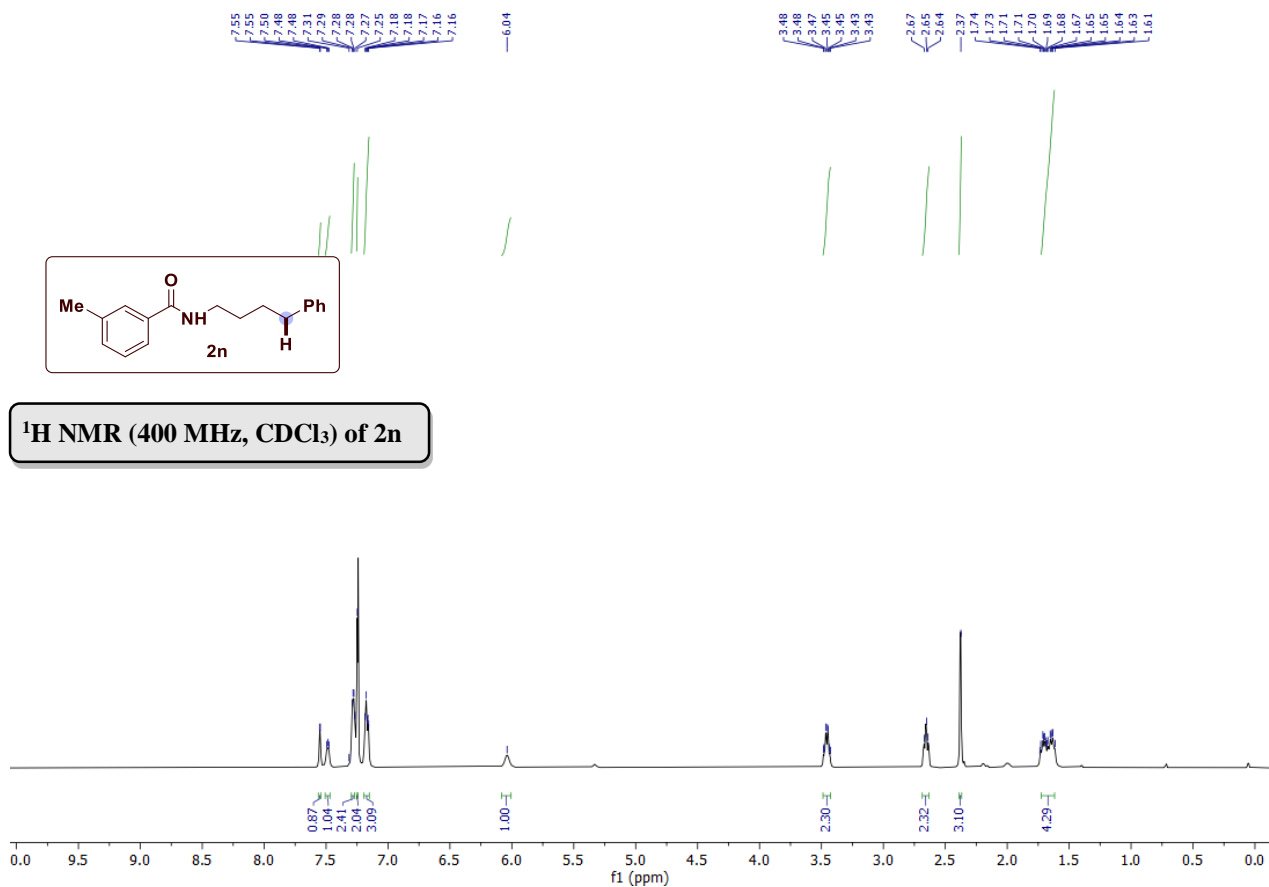

**$^{13}\text{C}\{^1\text{H}\}$  NMR (100 MHz,  $\text{CDCl}_3$ ) of 2n**

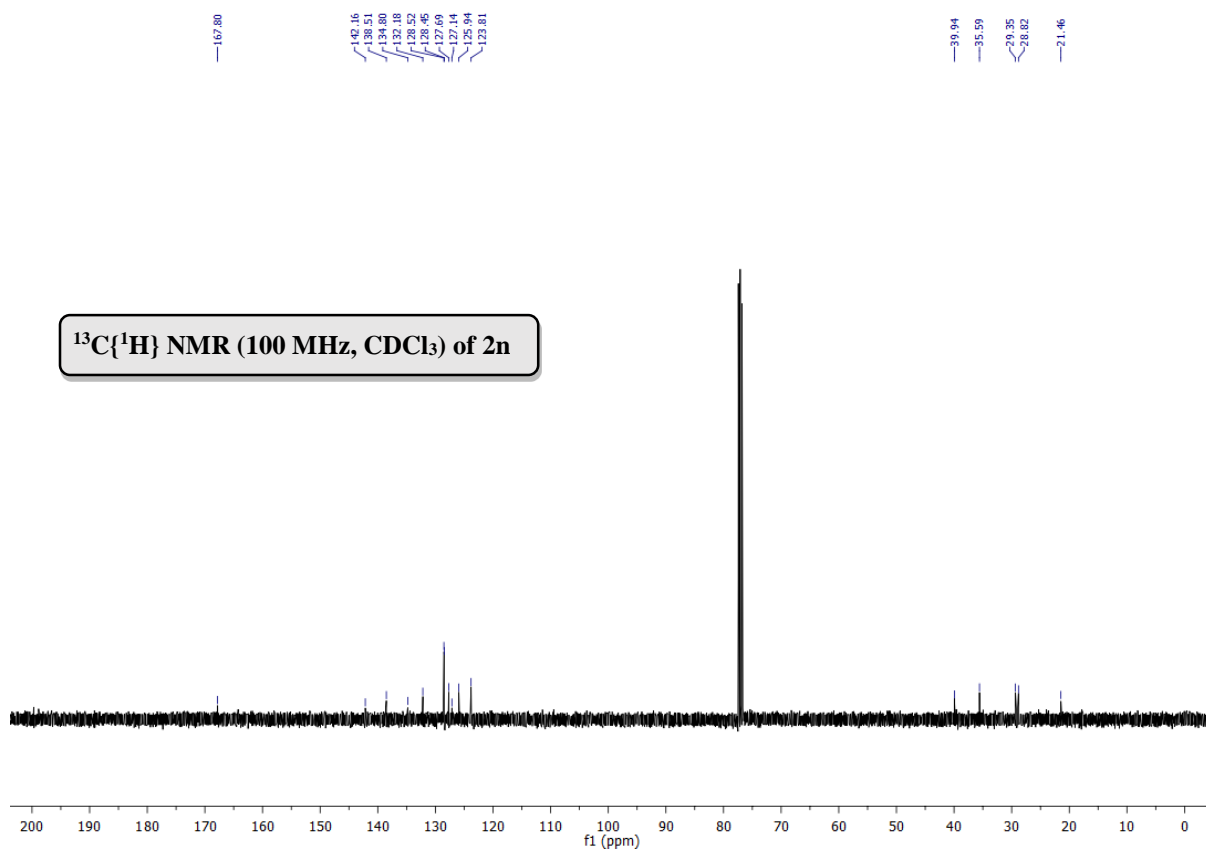

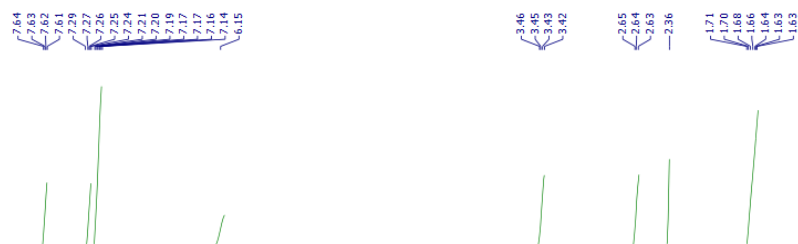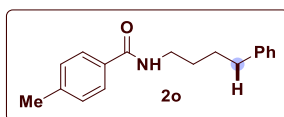

**$^1\text{H}$  NMR (400 MHz,  $\text{CDCl}_3$ ) of 2o**

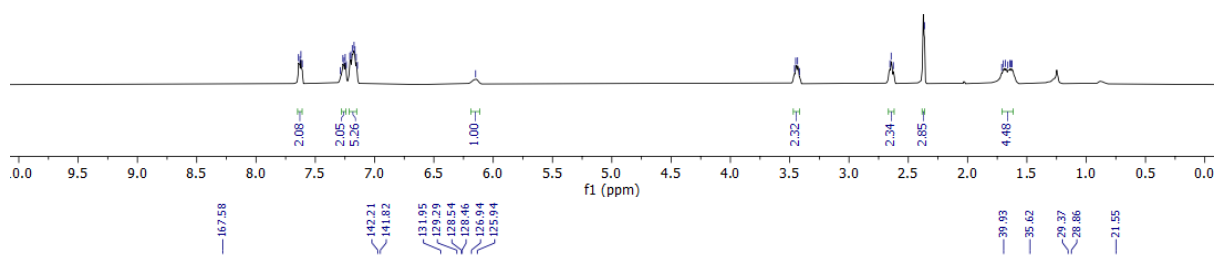

**$^{13}\text{C}\{^1\text{H}\}$  NMR (100 MHz,  $\text{CDCl}_3$ ) of 2o**

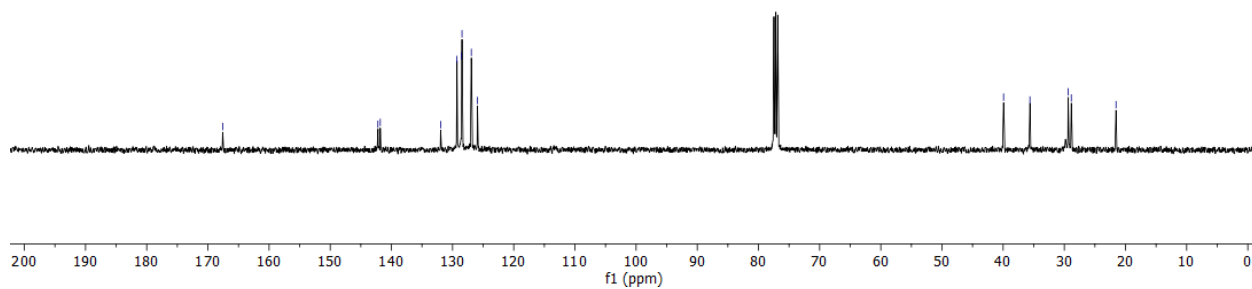

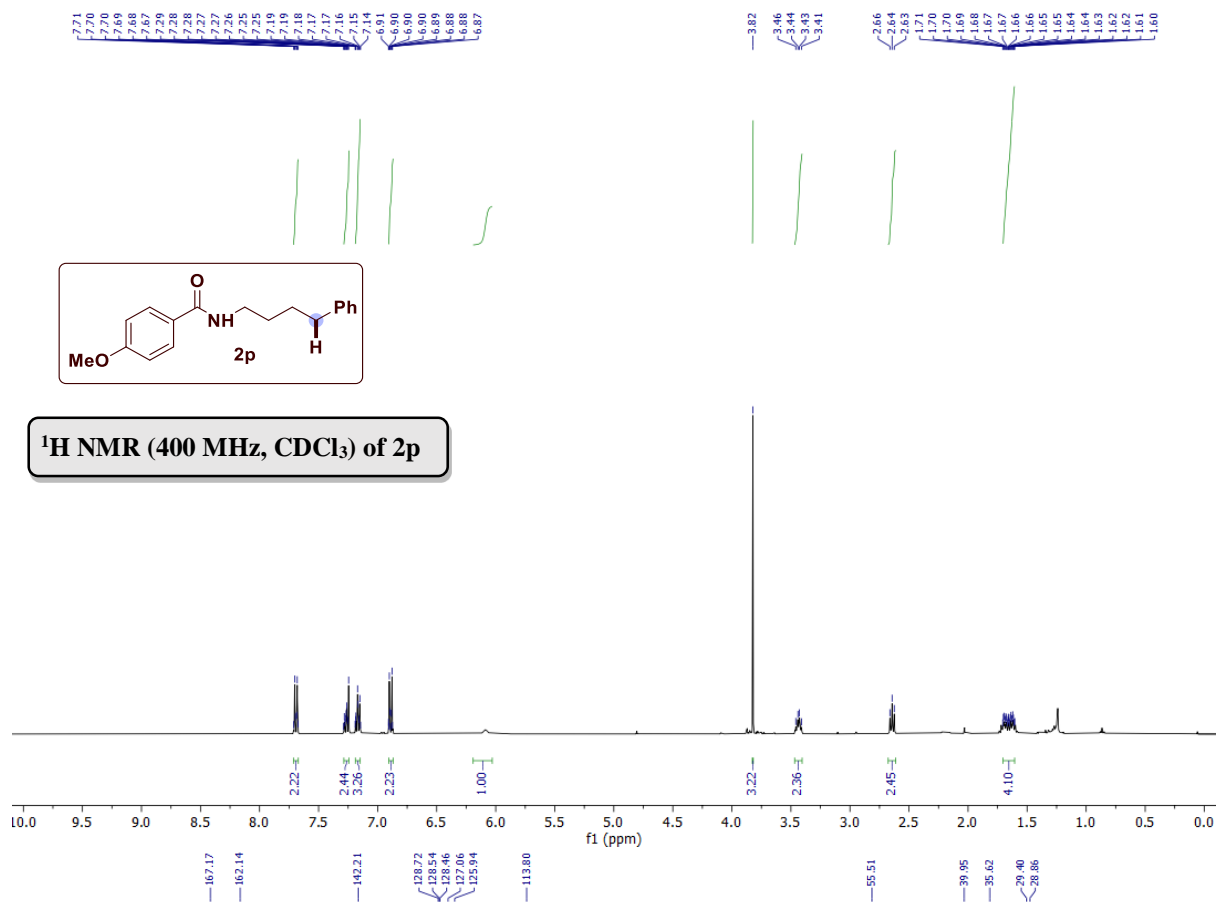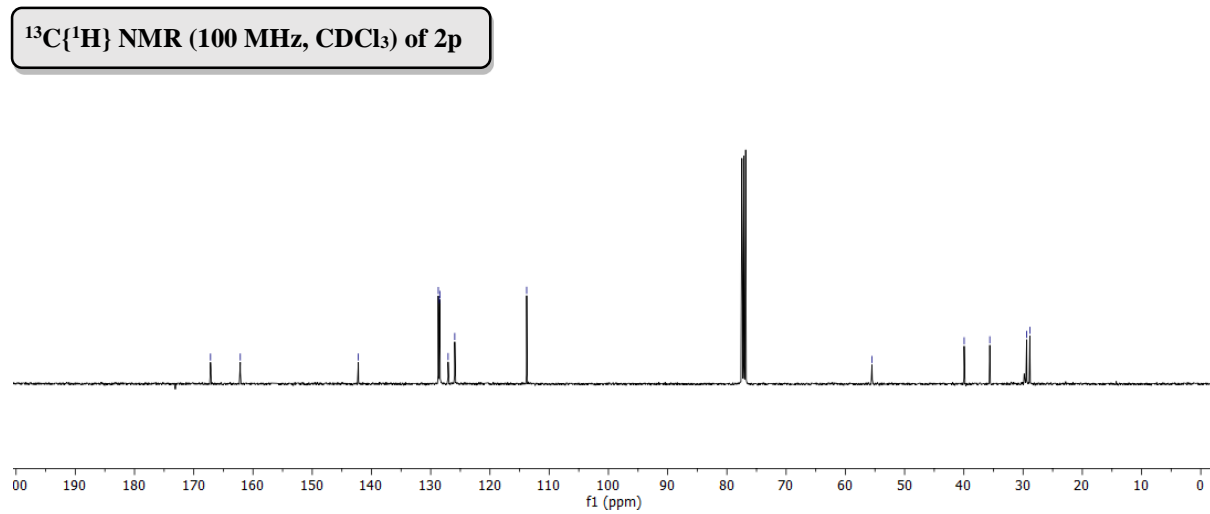



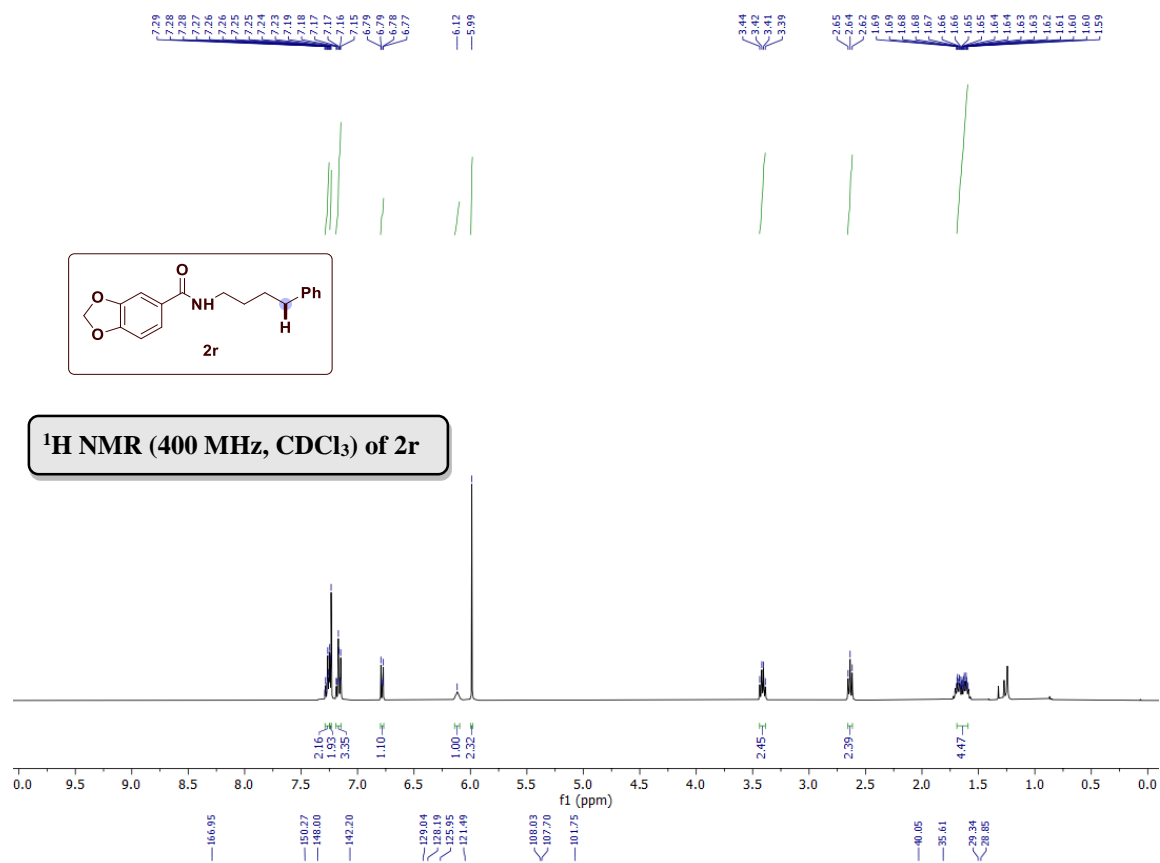

**<sup>13</sup>C{<sup>1</sup>H} NMR (100 MHz, CDCl<sub>3</sub>) of 2r**

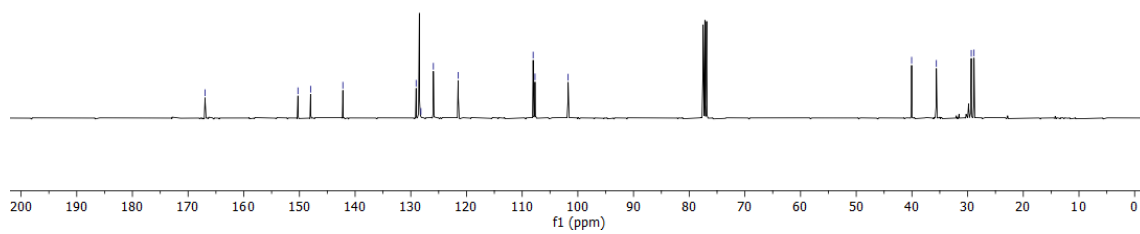

7.74  
7.74  
7.72  
7.71  
7.71  
6.91  
6.91  
6.90  
6.90  
6.88  
6.88  
6.25  
5.43  
5.43  
3.82  
3.82  
3.43  
3.43  
3.40  
3.40  
2.34  
2.34  
2.32  
2.32  
2.30  
2.30  
2.24  
2.24  
2.21  
2.21  
2.18  
2.15  
2.15  
2.12  
2.12  
2.10  
2.10  
2.05  
2.05  
1.99  
1.99  
1.97  
1.95  
1.92  
1.92  
1.83  
1.83  
1.80  
1.80  
1.78  
1.78  
1.73  
1.73  
1.69  
1.69  
1.67  
1.67  
1.57  
1.57  
1.54  
1.54  
1.51  
1.51  
1.49  
1.49  
1.48  
1.48  
1.46  
1.46  
1.44  
1.44  
1.43  
1.43  
1.41  
1.41  
1.40  
1.40  
1.39  
1.39  
1.36  
1.36  
1.34  
1.34  
1.33  
1.33  
1.31  
1.31  
1.28  
1.28  
1.19  
1.19  
1.18  
1.18  
1.15  
1.15  
1.12  
1.12  
1.09  
1.09  
1.07  
1.07  
1.03  
1.03  
1.00  
1.00  
0.96  
0.96  
0.88  
0.88  
0.86  
0.86  
0.85  
0.85  
0.70  
0.70  
0.66  
0.66  
0.65  
0.65  
0.64  
0.64  
0.59  
0.59

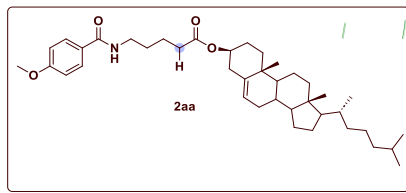

**<sup>1</sup>H NMR (400 MHz, CDCl<sub>3</sub>) of 2aa**

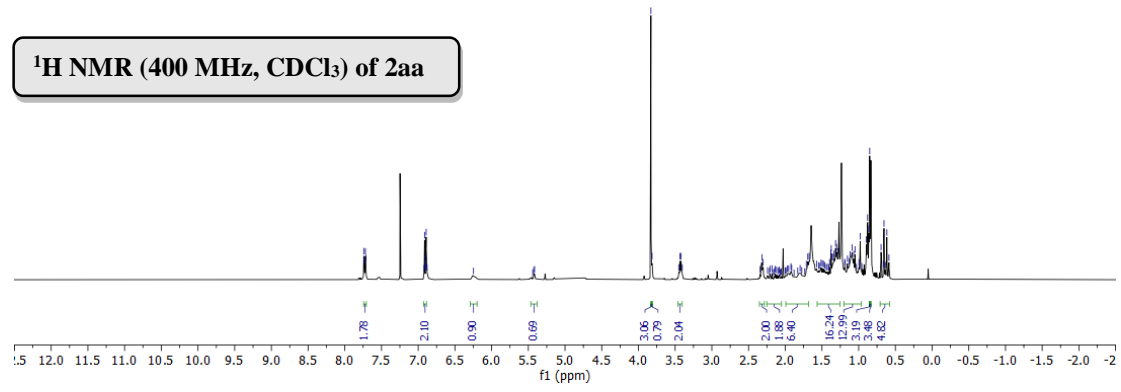

**<sup>13</sup>C{<sup>1</sup>H} NMR (100 MHz, CDCl<sub>3</sub>) of 2aa**

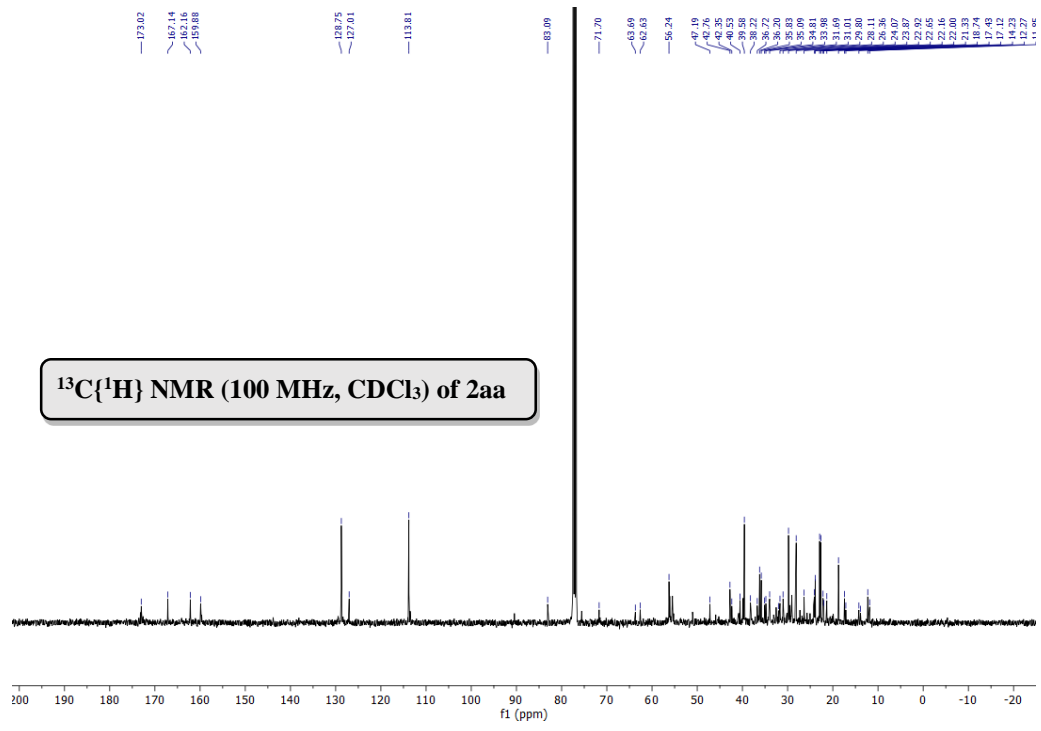

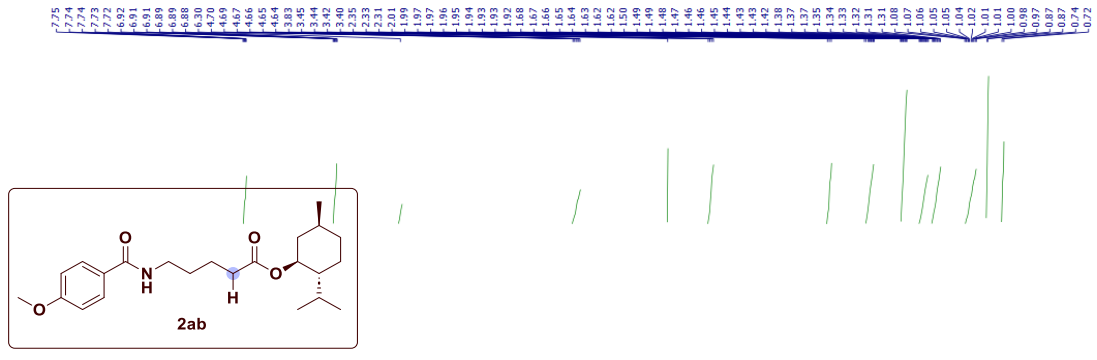

<sup>1</sup>H NMR (400 MHz, CDCl<sub>3</sub>) of 2ab

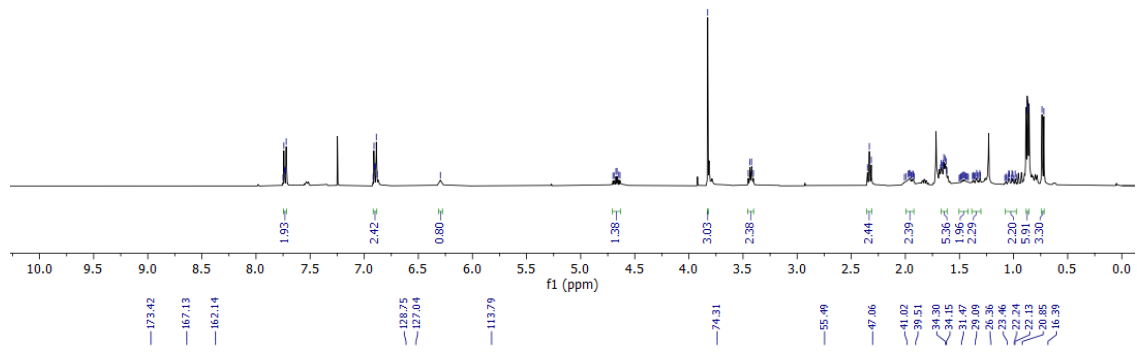

<sup>13</sup>C{<sup>1</sup>H} NMR (100 MHz, CDCl<sub>3</sub>) of 2ab

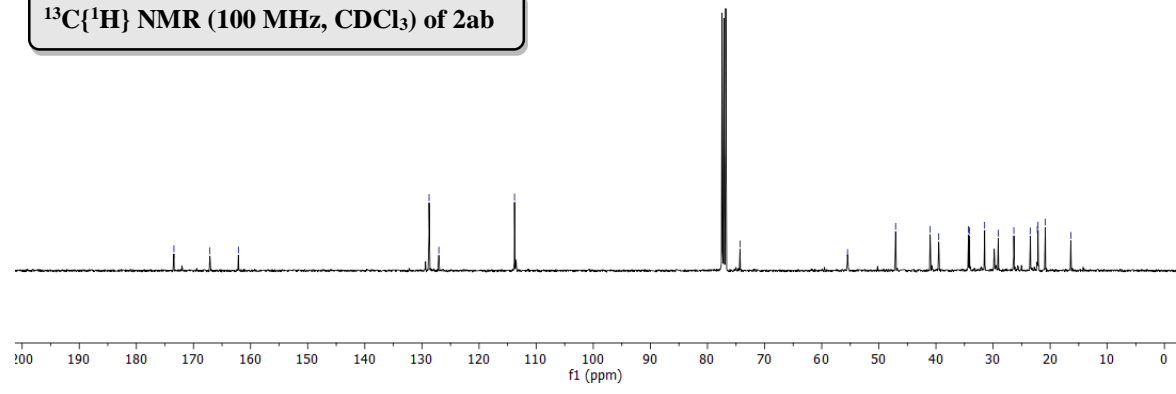



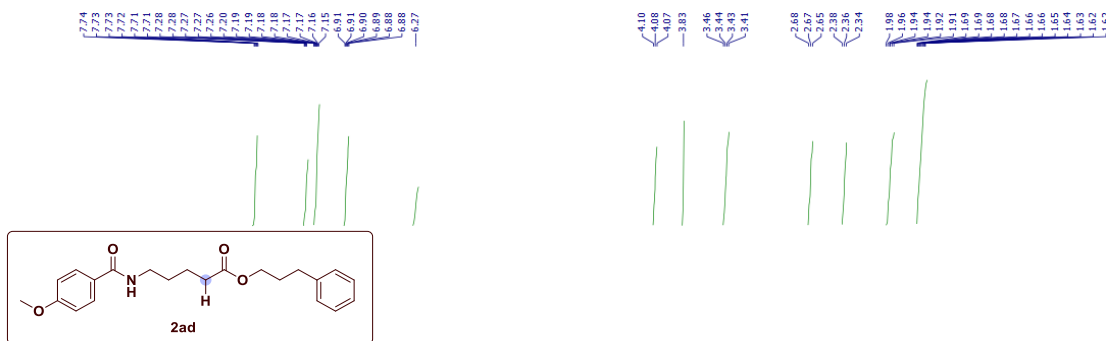

<sup>1</sup>H NMR (400 MHz, CDCl<sub>3</sub>) of 2ad

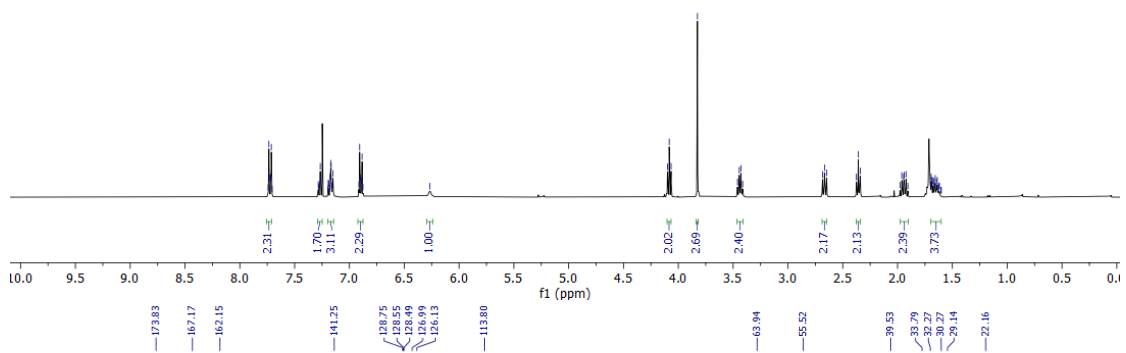

<sup>13</sup>C{<sup>1</sup>H} NMR (100 MHz, CDCl<sub>3</sub>) of 2ad

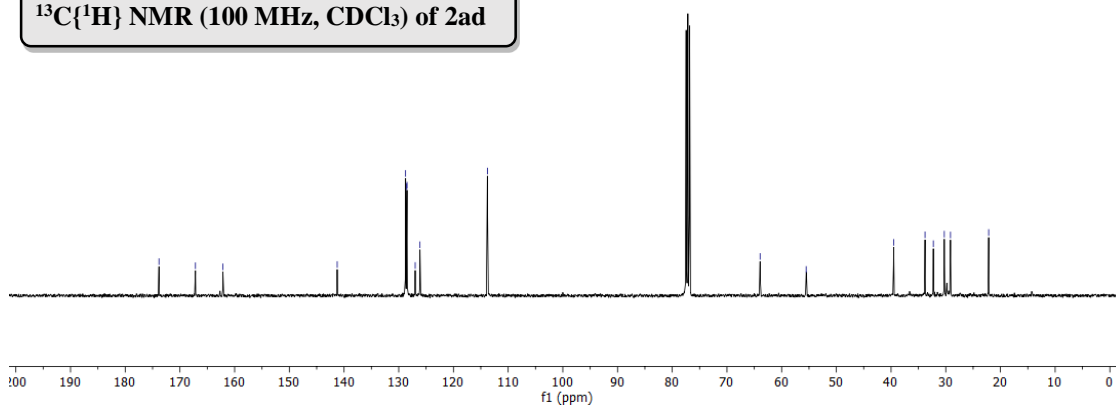

7.75  
7.74  
7.73  
7.72  
7.71  
6.91  
6.90  
6.89  
4.92  
4.17  
4.15  
4.14  
4.13  
4.11  
4.10  
4.09  
4.01  
3.98  
3.96  
3.86  
3.84  
3.84  
3.83  
3.79  
3.72  
3.72  
3.76  
3.75  
3.74  
3.46  
3.44  
3.42  
3.41  
2.43  
2.41  
2.41  
2.03  
2.02  
2.01  
2.00  
1.99  
1.99  
1.98  
1.98  
1.97  
1.96  
1.95  
1.93  
1.92  
1.91  
1.90  
1.89  
1.88  
1.88  
1.86  
1.85  
1.75  
1.74  
1.72  
1.70  
1.68  
1.63  
1.62  
1.61  
1.59  
1.58  
1.57  
1.55

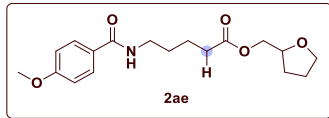

**<sup>1</sup>H NMR (400 MHz, CDCl<sub>3</sub>) of 2ae**

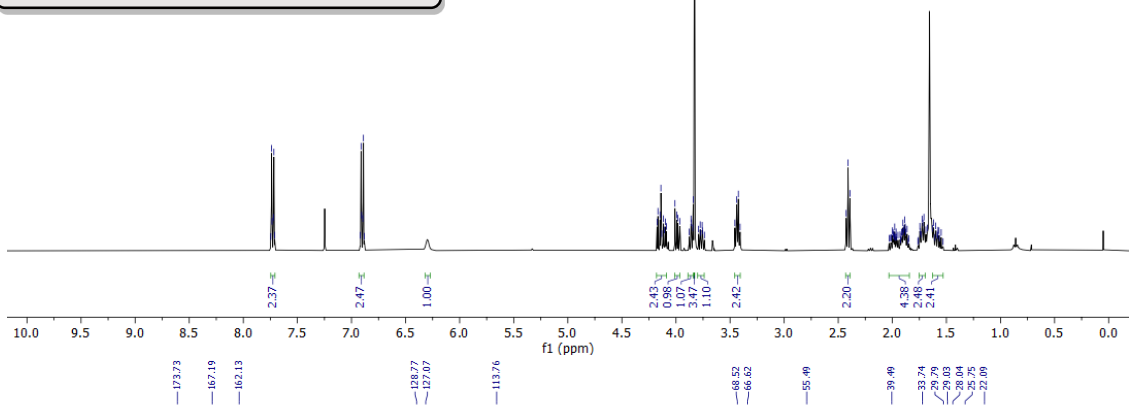

**<sup>13</sup>C{<sup>1</sup>H} NMR (100 MHz, CDCl<sub>3</sub>) of 2ae**

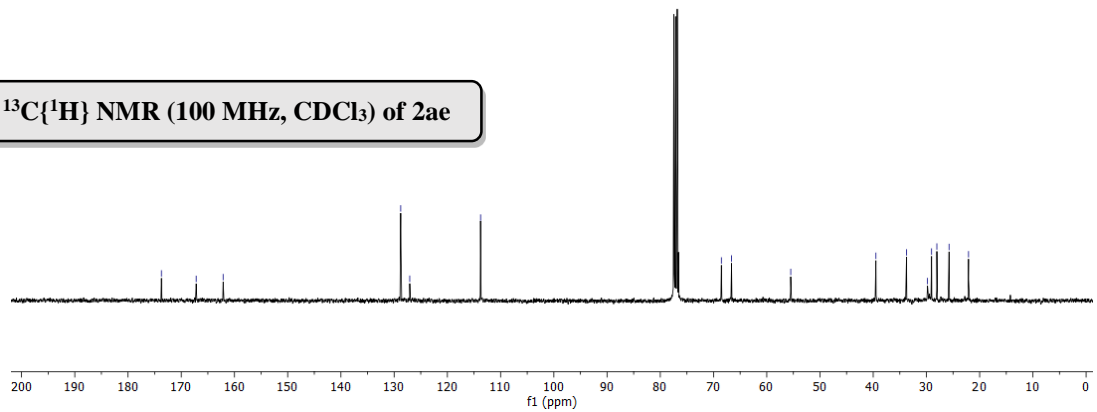



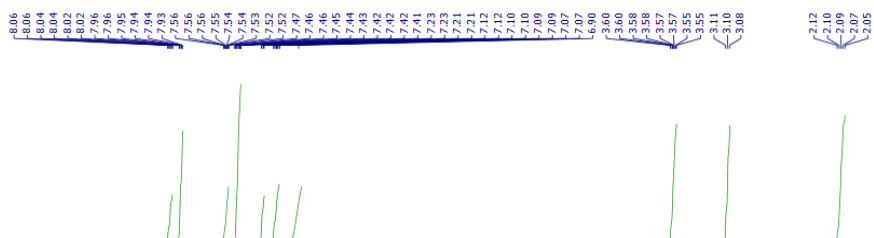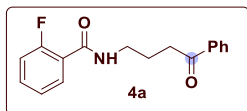

<sup>1</sup>H NMR (400 MHz, CDCl<sub>3</sub>) of 4a

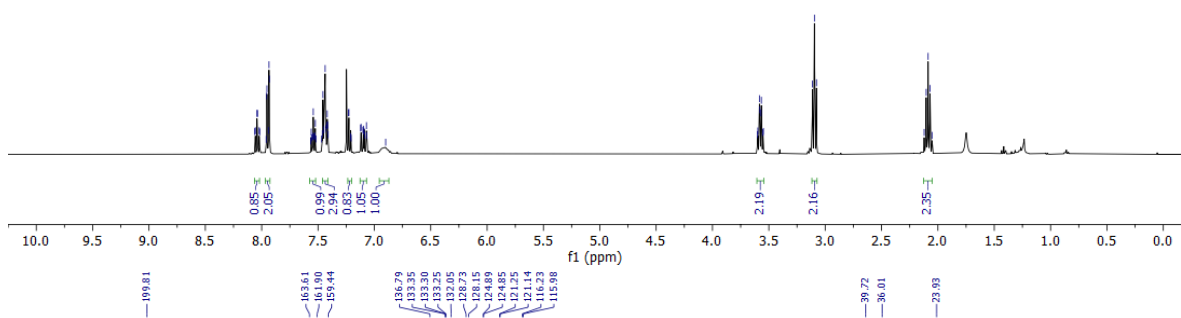

<sup>13</sup>C{<sup>1</sup>H} NMR (100 MHz, CDCl<sub>3</sub>) of 4a

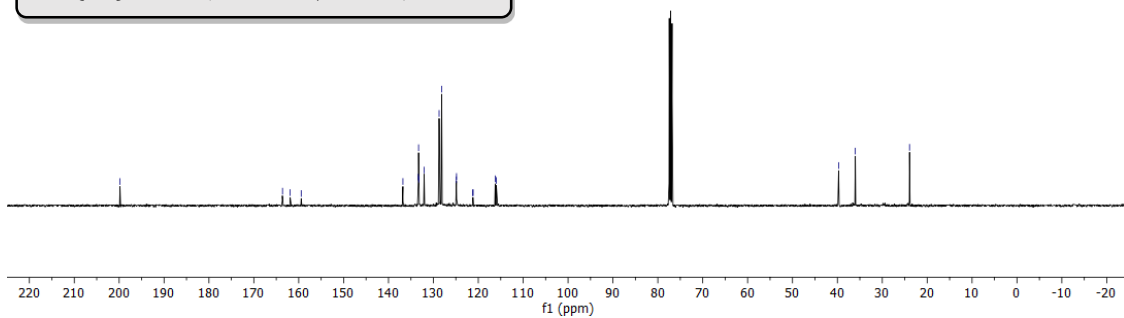

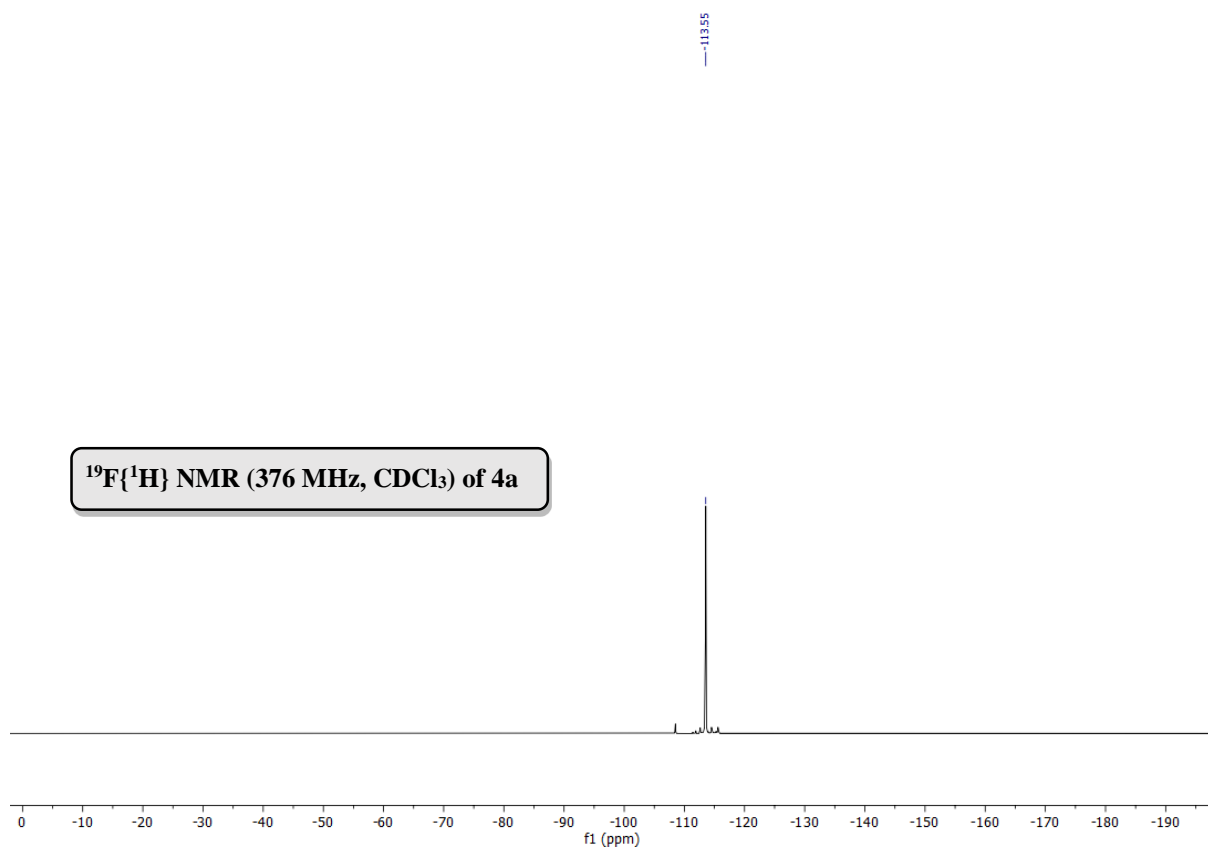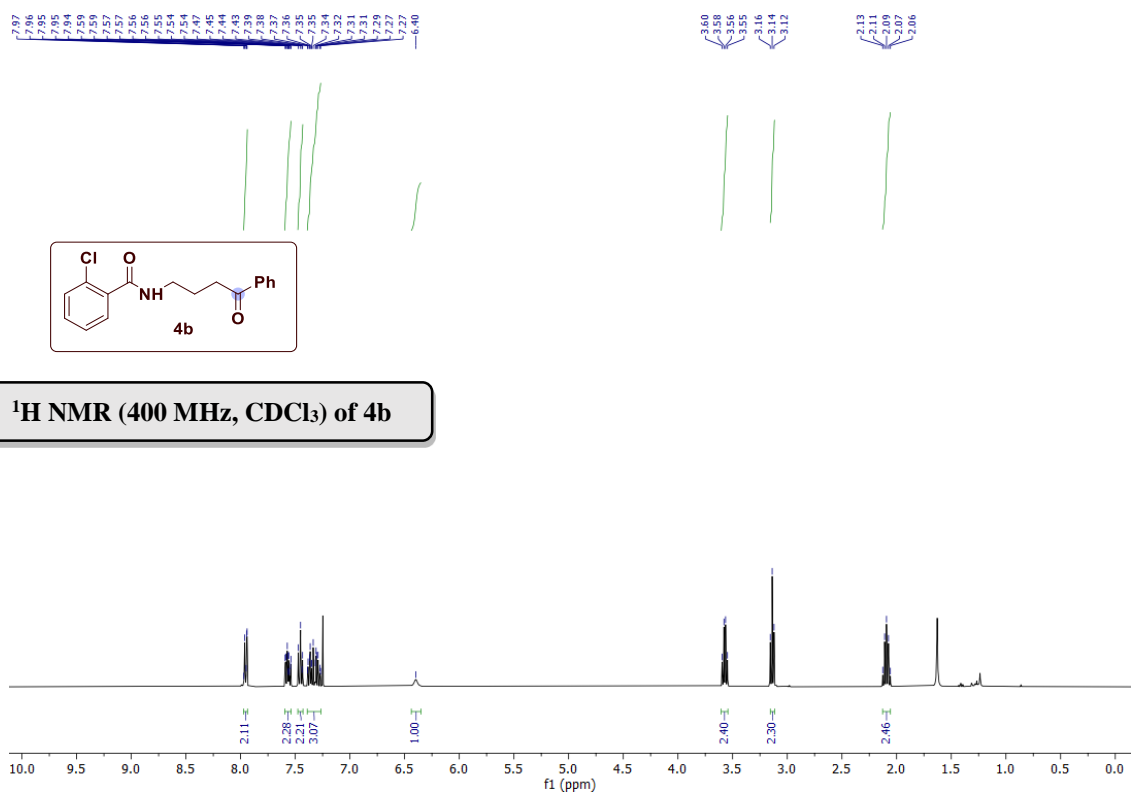

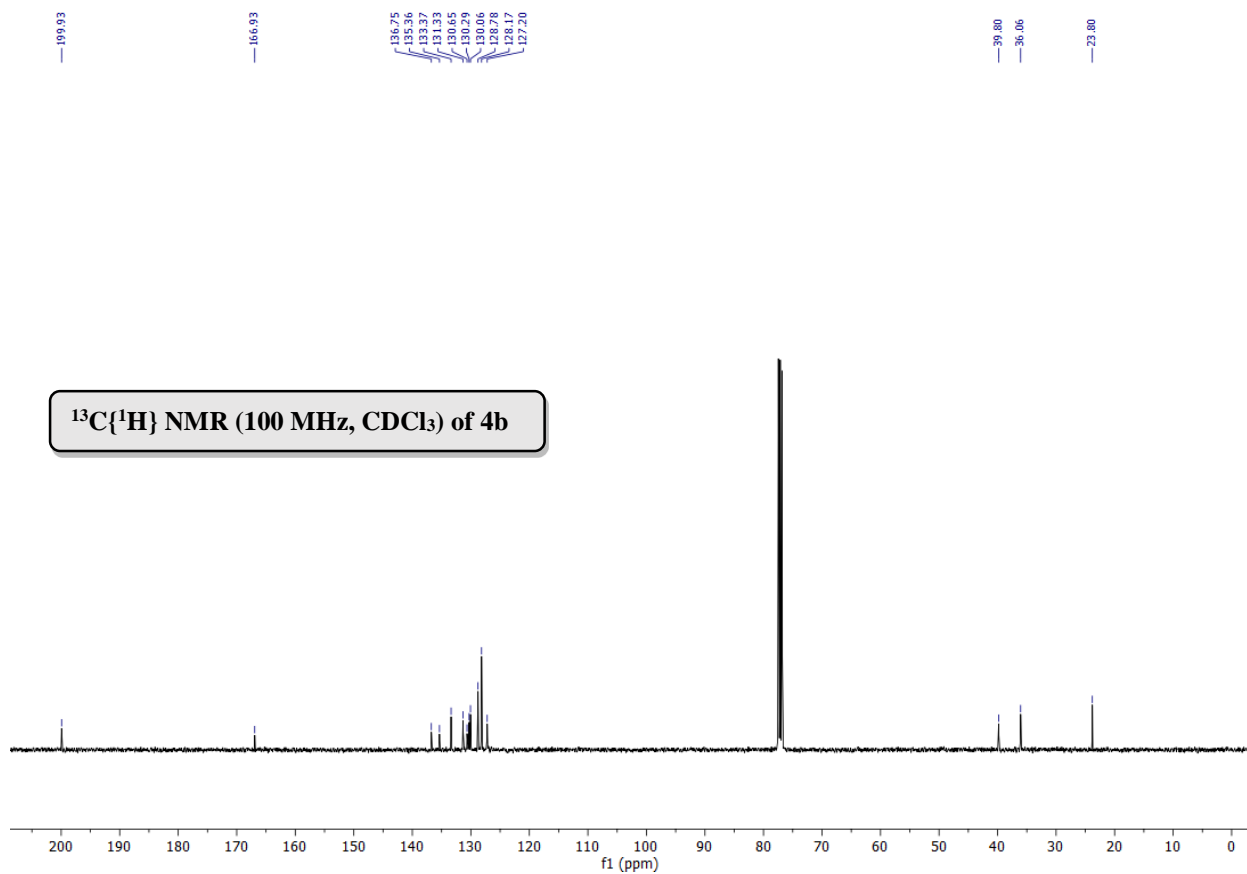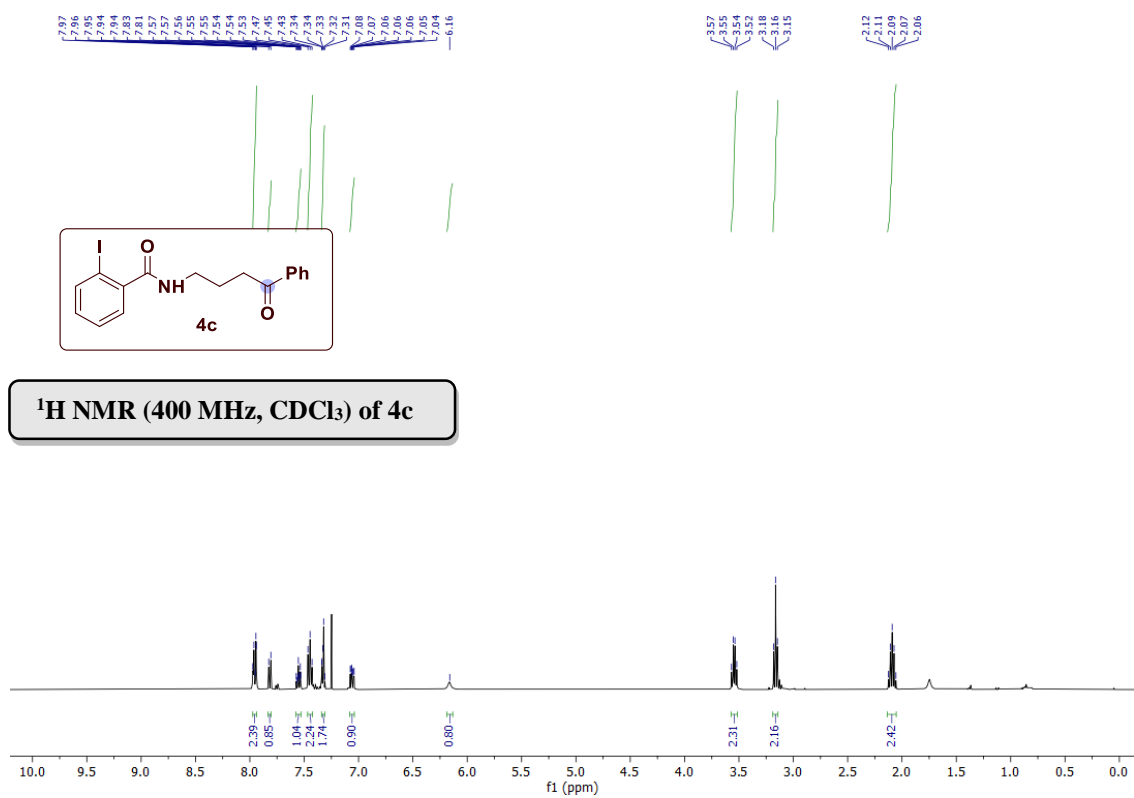

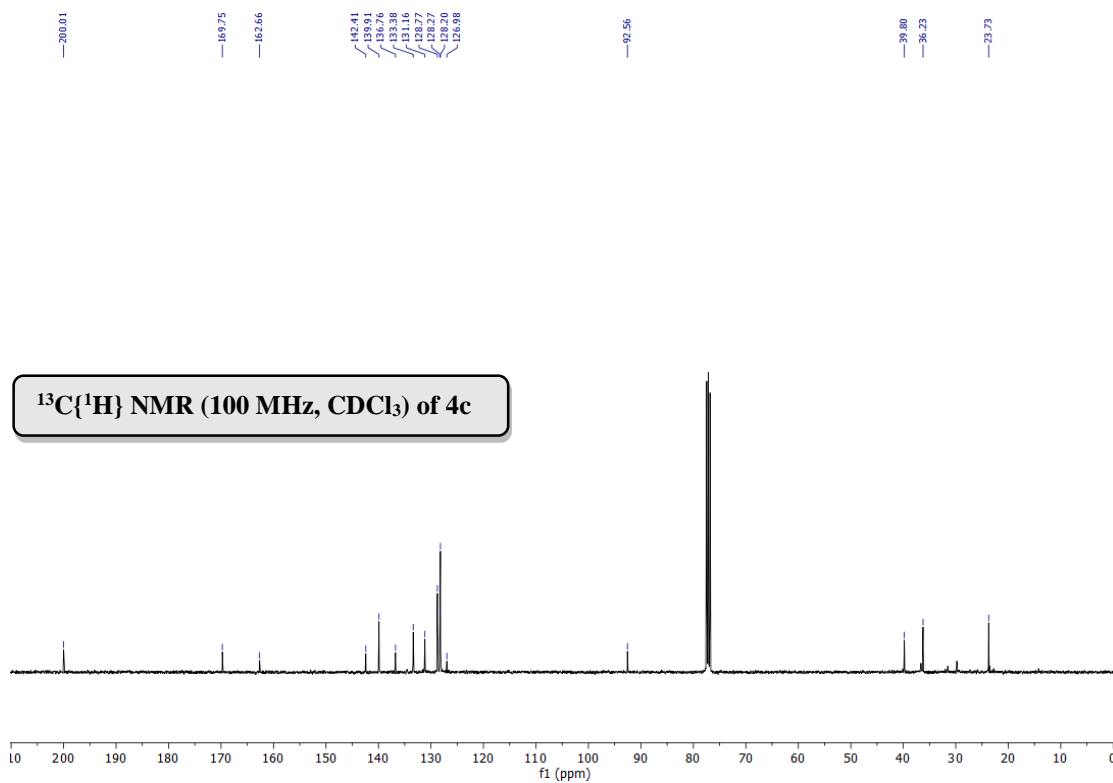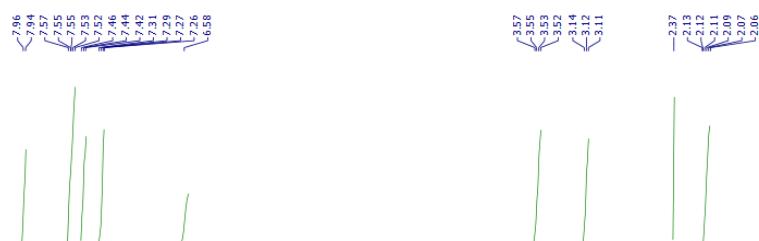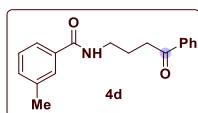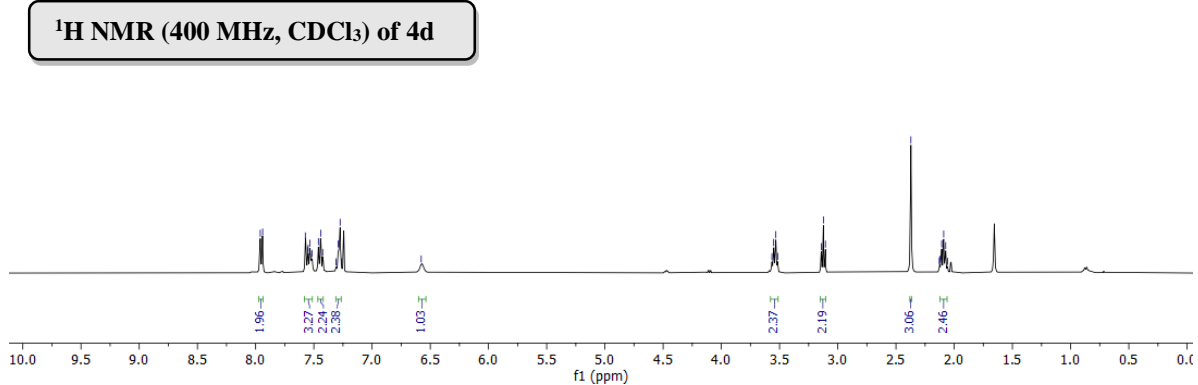

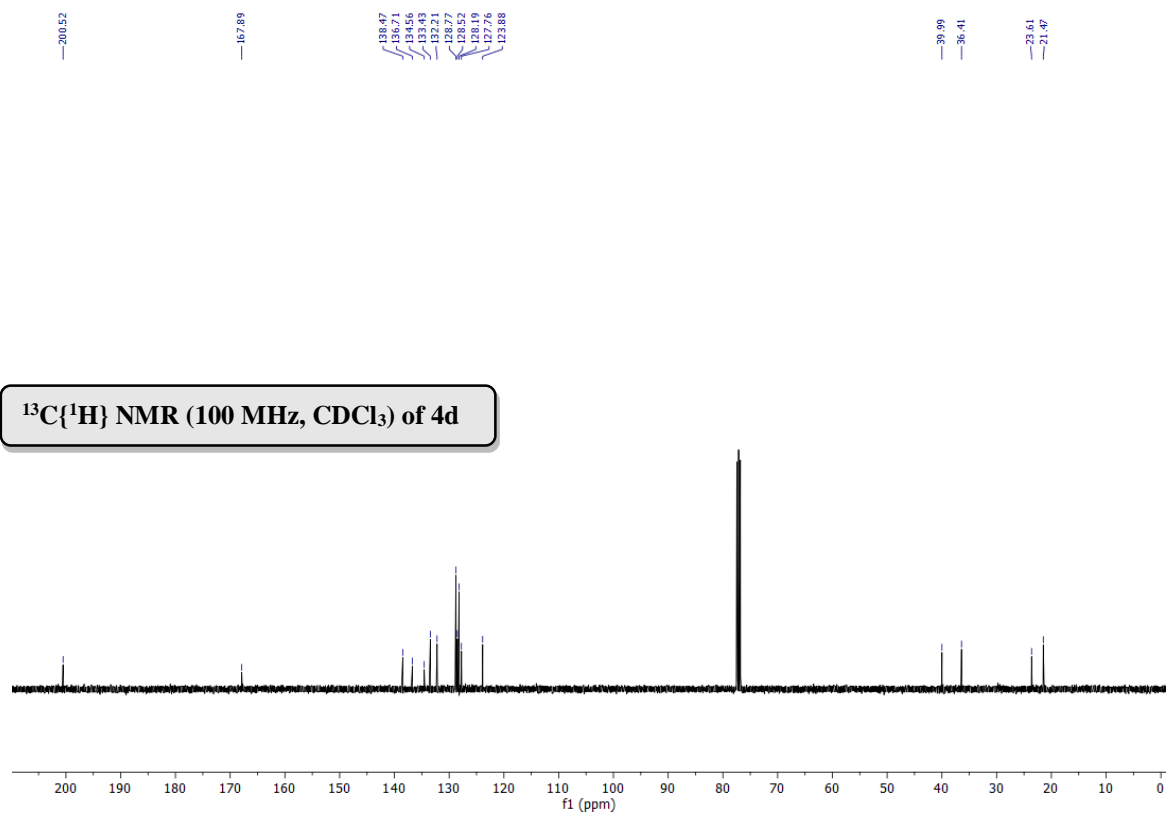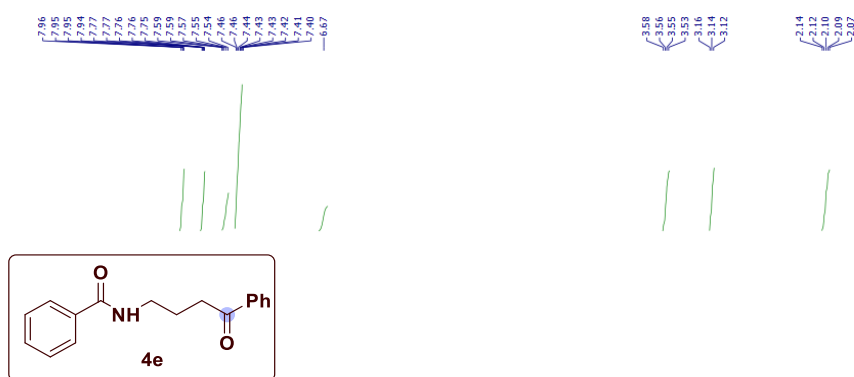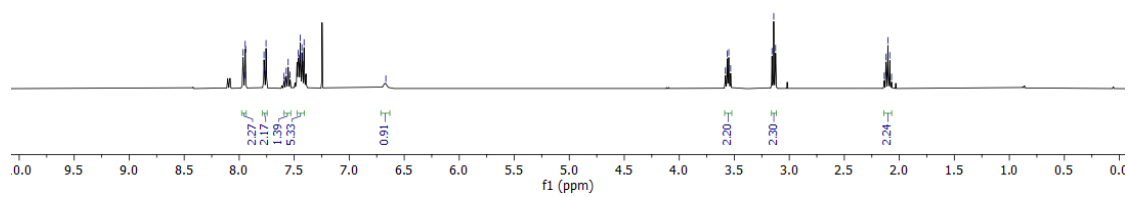

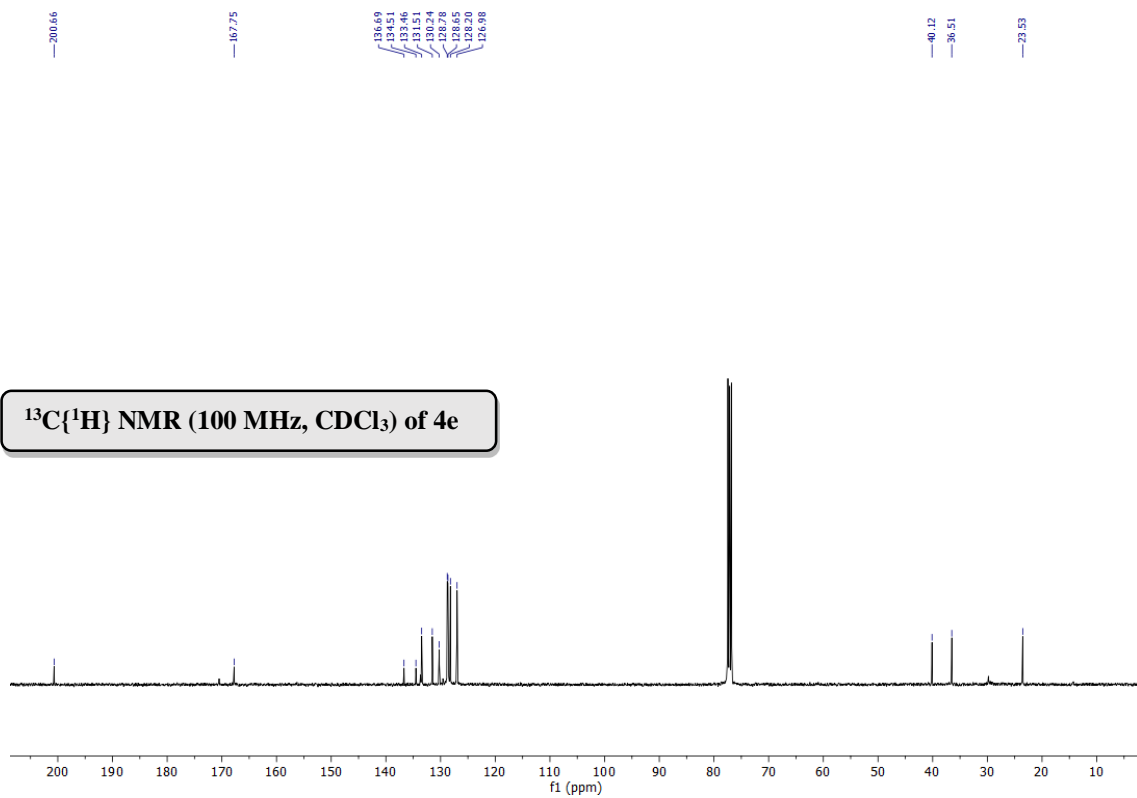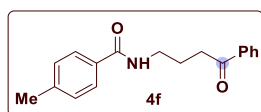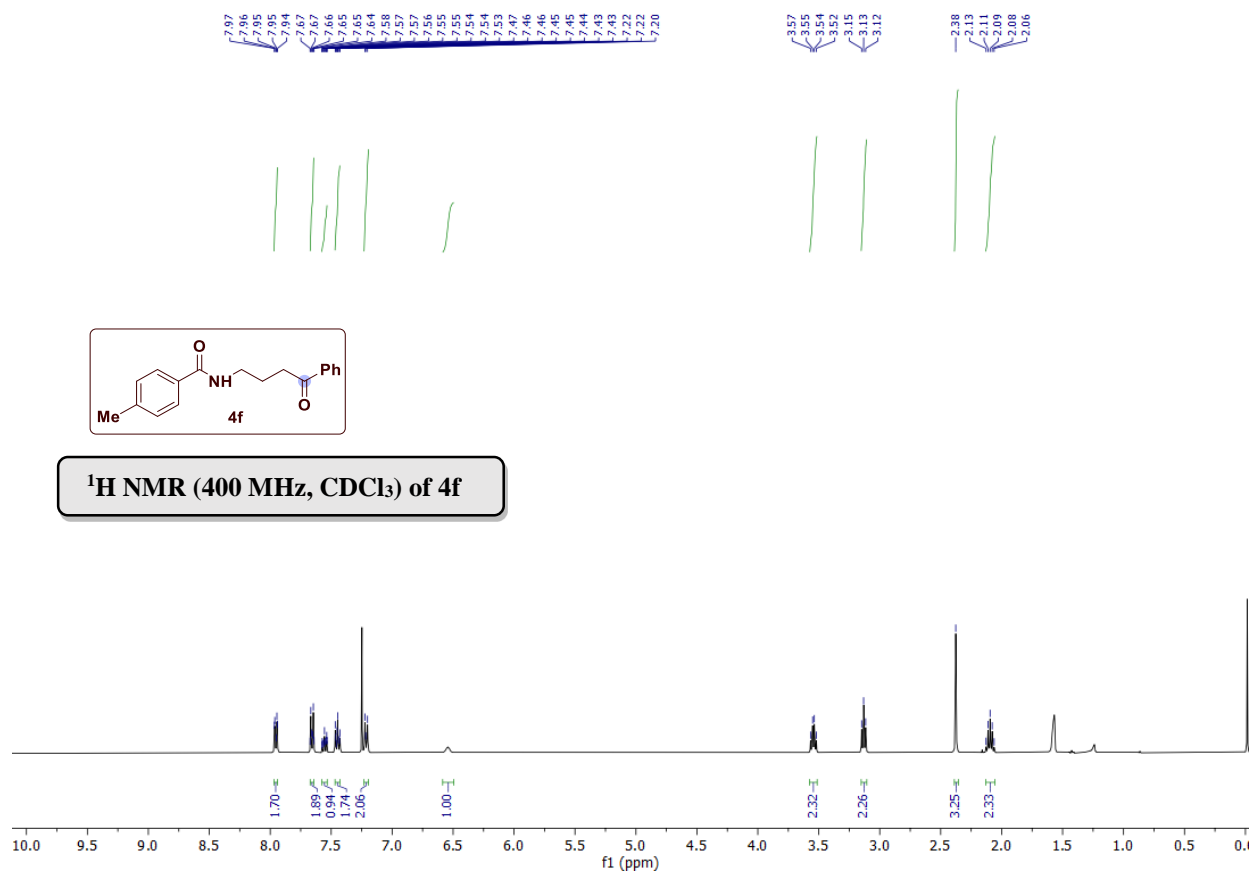



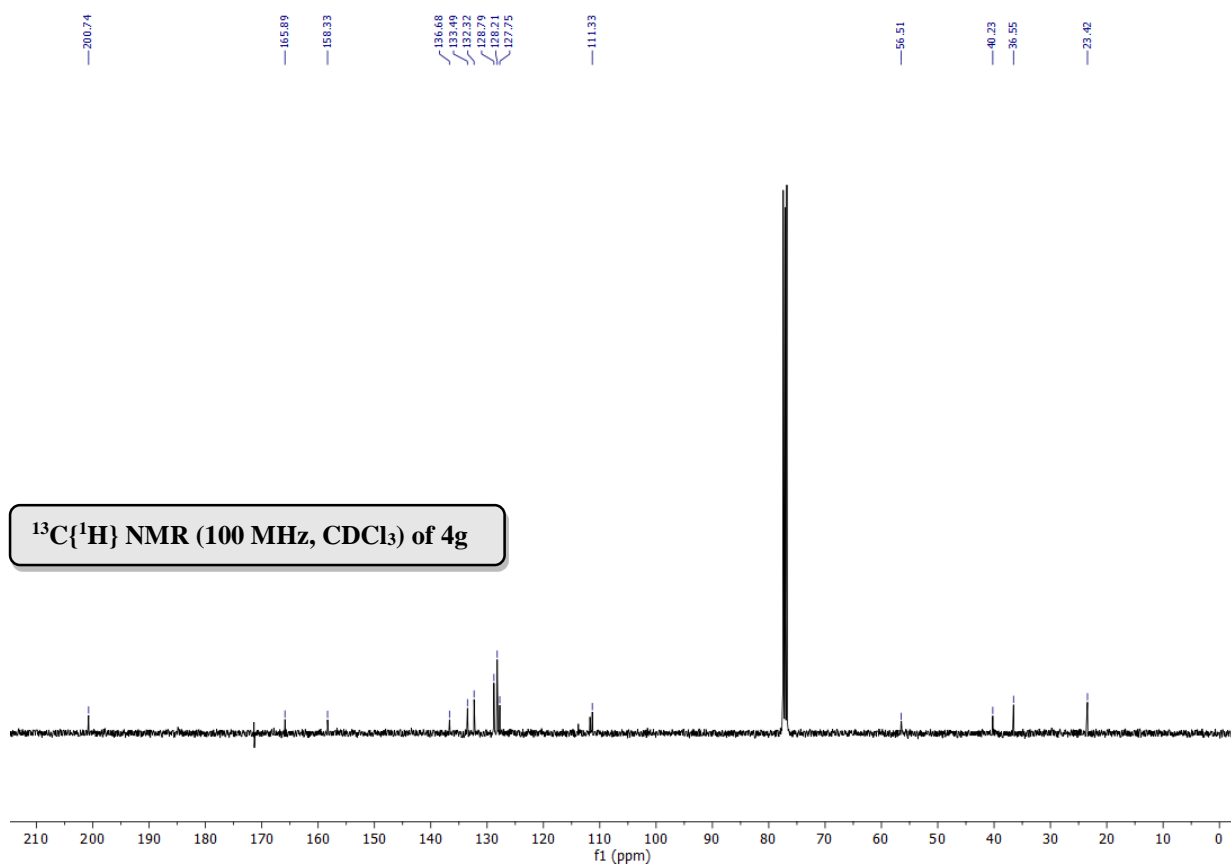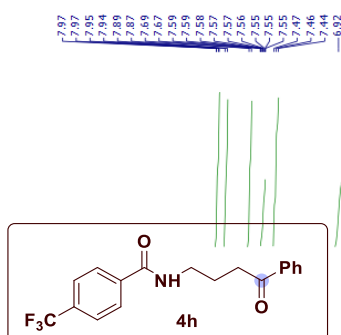

**$^1\text{H}$  NMR (400 MHz,  $\text{CDCl}_3$ ) of 4h**

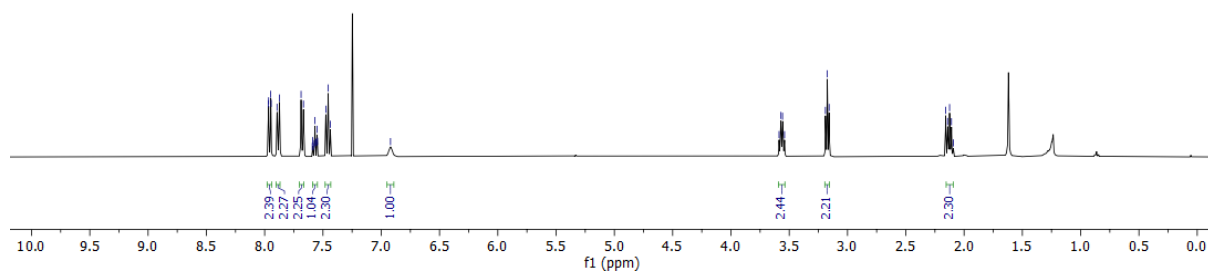

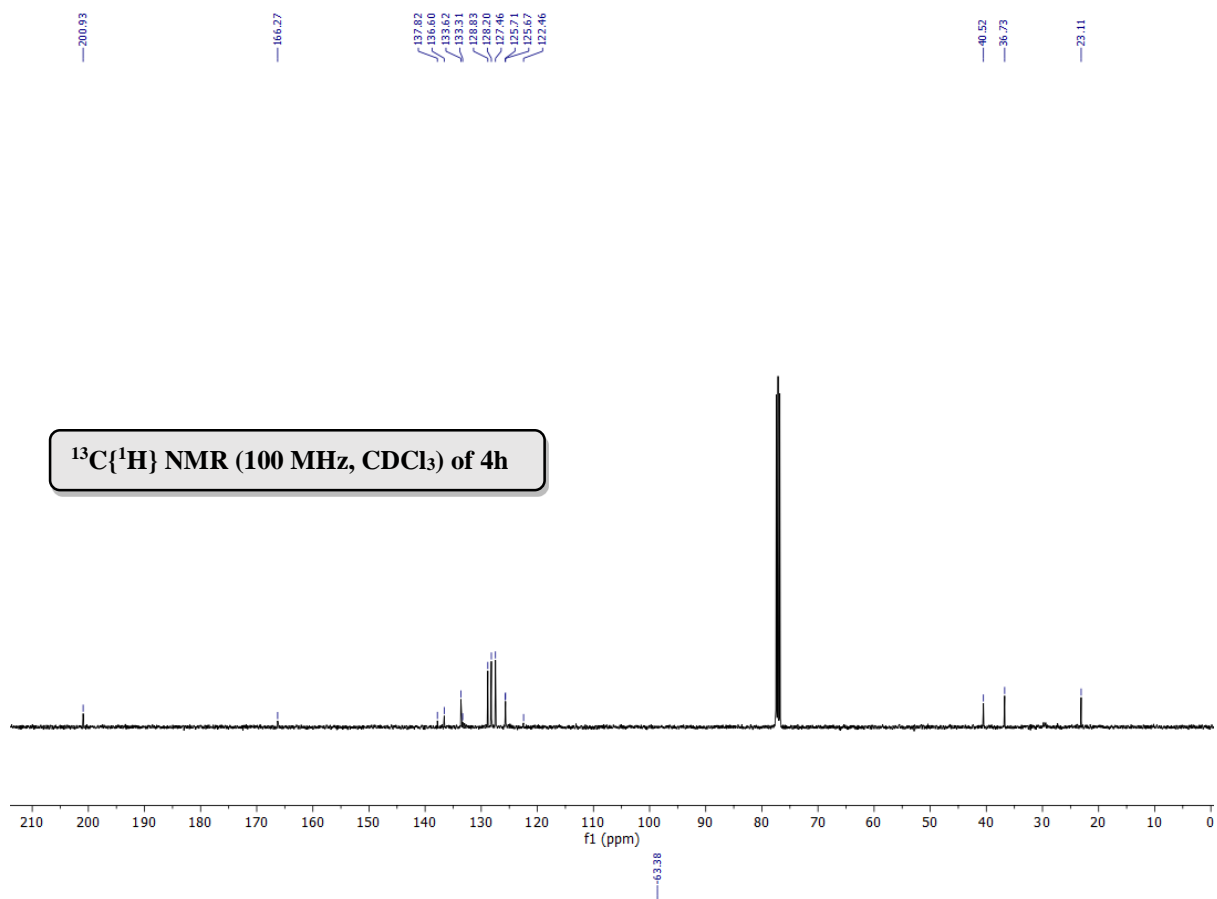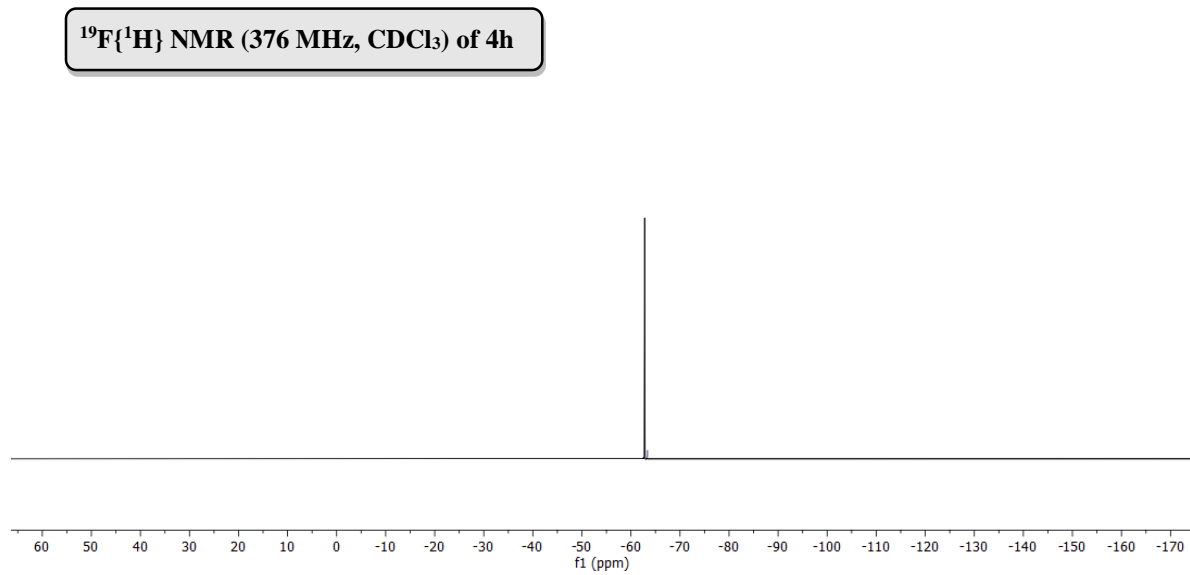



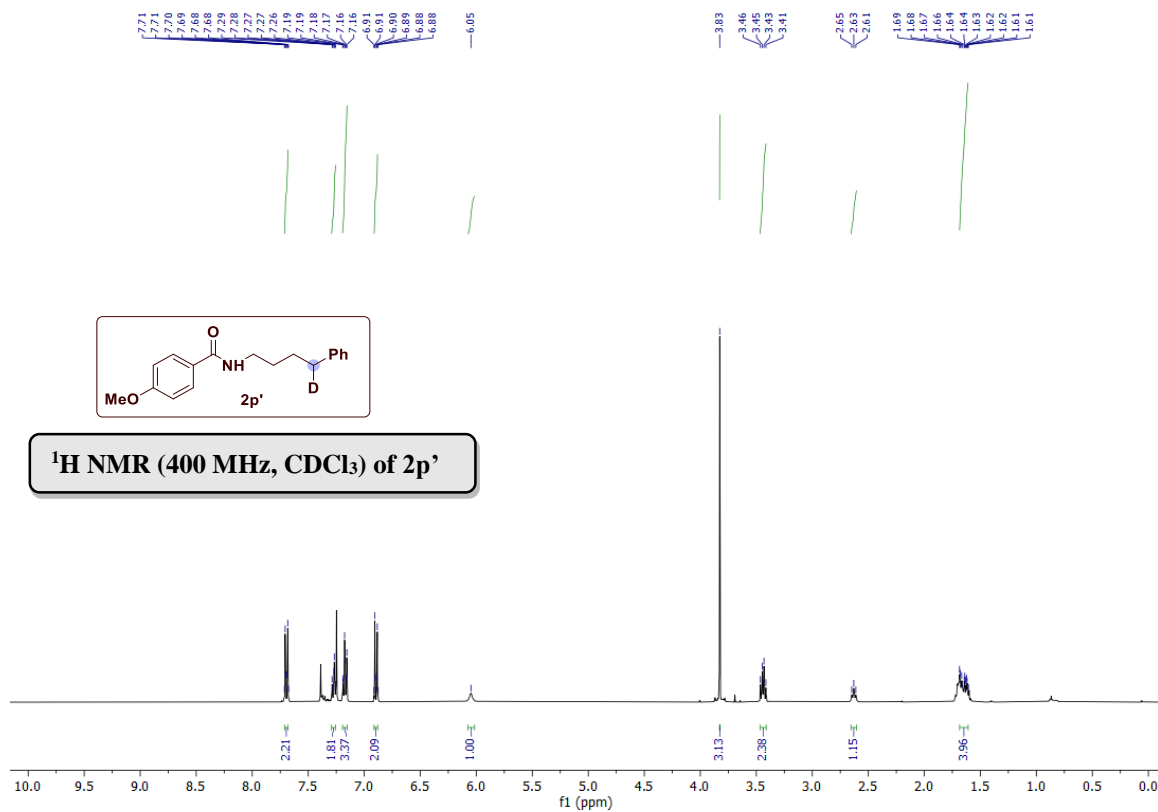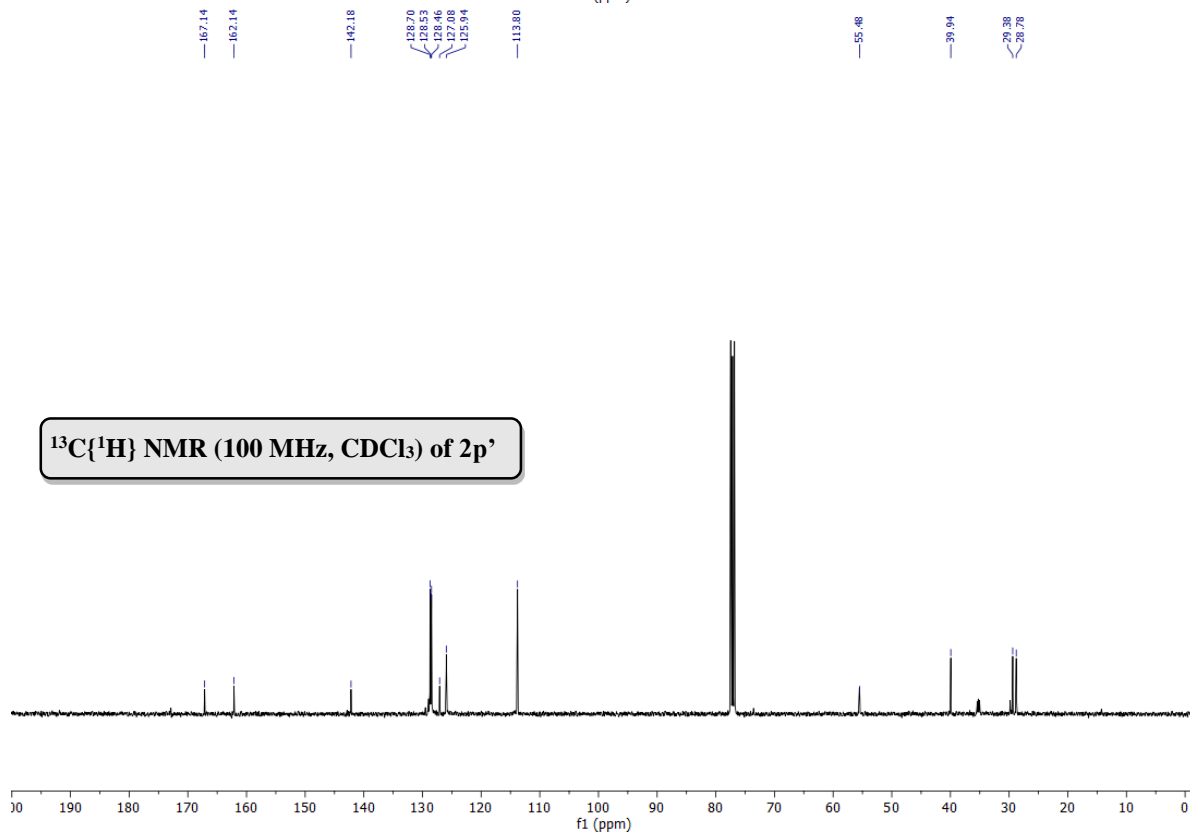

7.761  
7.759  
7.754  
7.746  
7.742  
7.737  
7.504  
7.501  
7.496  
7.488  
7.482  
7.476  
7.468  
7.463  
7.460  
7.440  
7.435  
7.430  
7.420  
7.415  
7.411  
7.403  
-6.191

3.650  
3.479  
3.462  
3.447  
3.444  
3.429  
2.325  
2.307  
2.288  
1.690  
1.673  
1.664  
1.656  
1.646  
1.633  
1.442  
1.429  
1.422  
1.413  
1.404  
1.397  
1.381  
1.366  
1.361

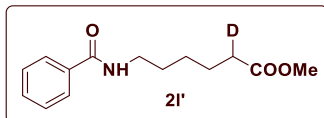

**<sup>1</sup>H NMR (400 MHz, CDCl<sub>3</sub>) of 2I'**

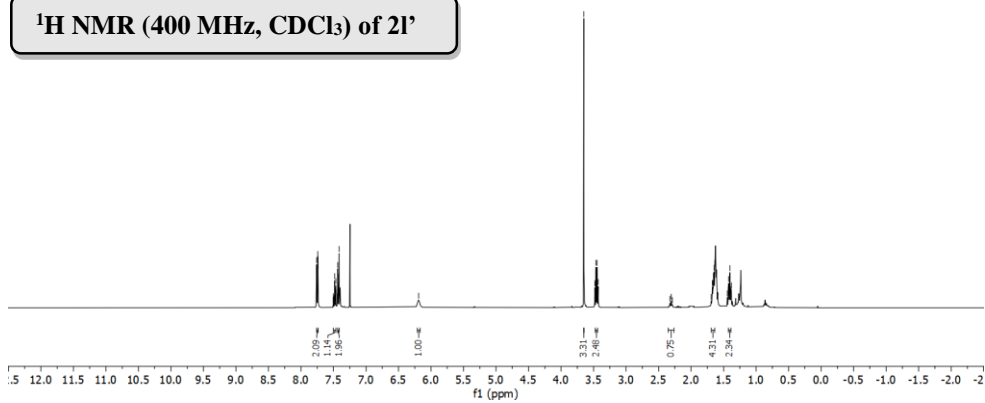

-174.260  
-167.624

134.813  
131.486  
128.663  
126.937

-51.667  
-39.814  
-29.373  
-26.418  
-24.434

**<sup>13</sup>C{<sup>1</sup>H} NMR (100 MHz, CDCl<sub>3</sub>) of 2I'**

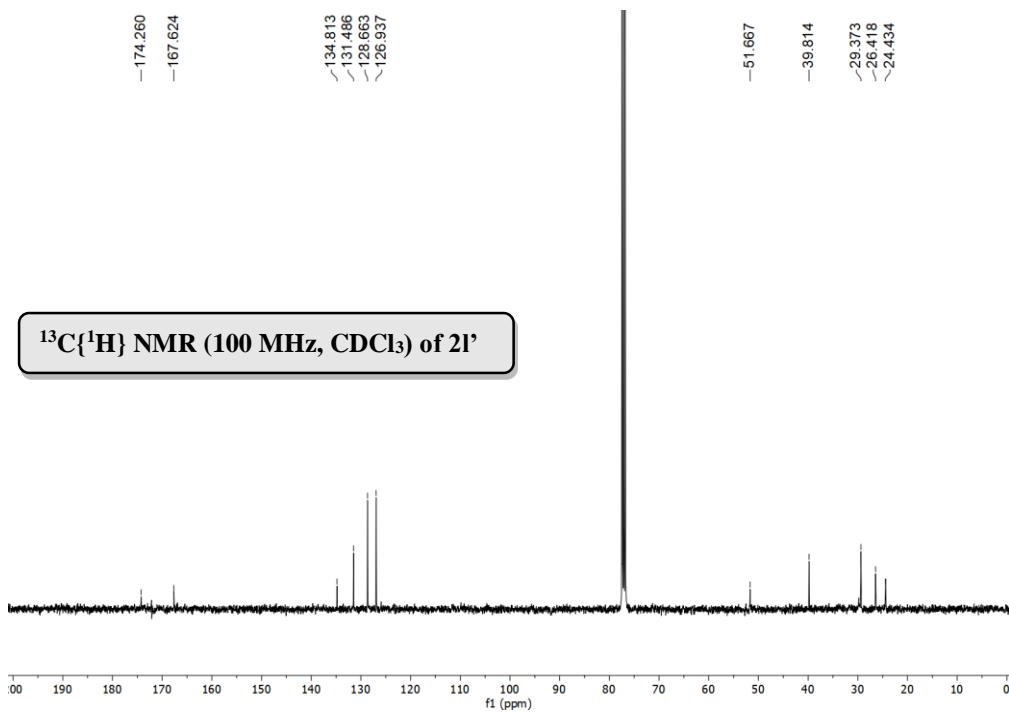

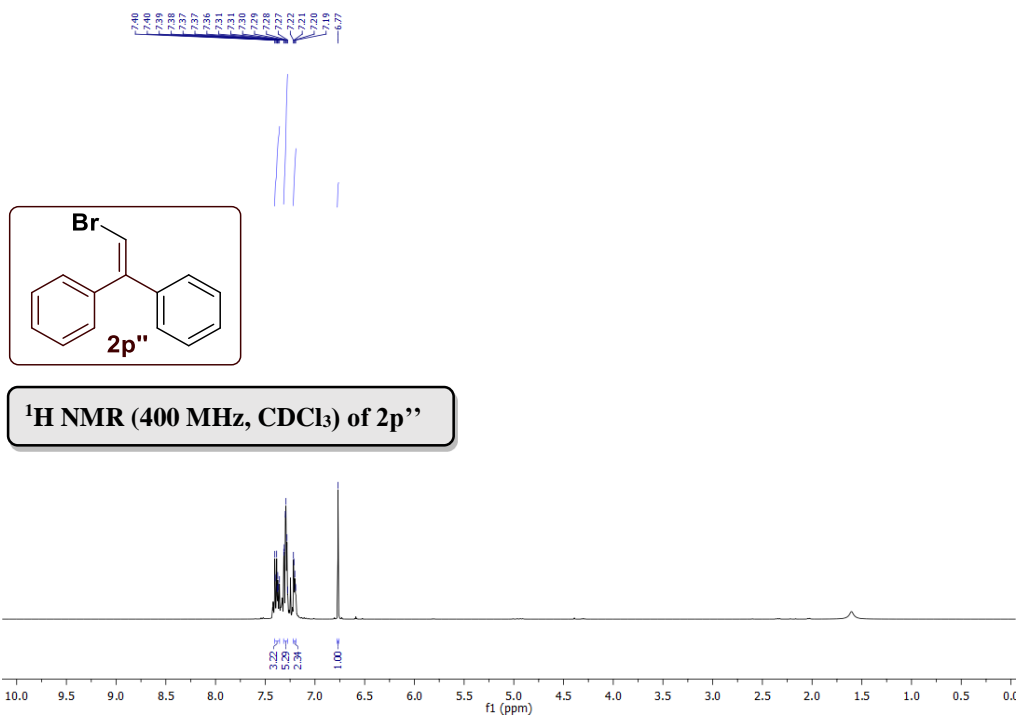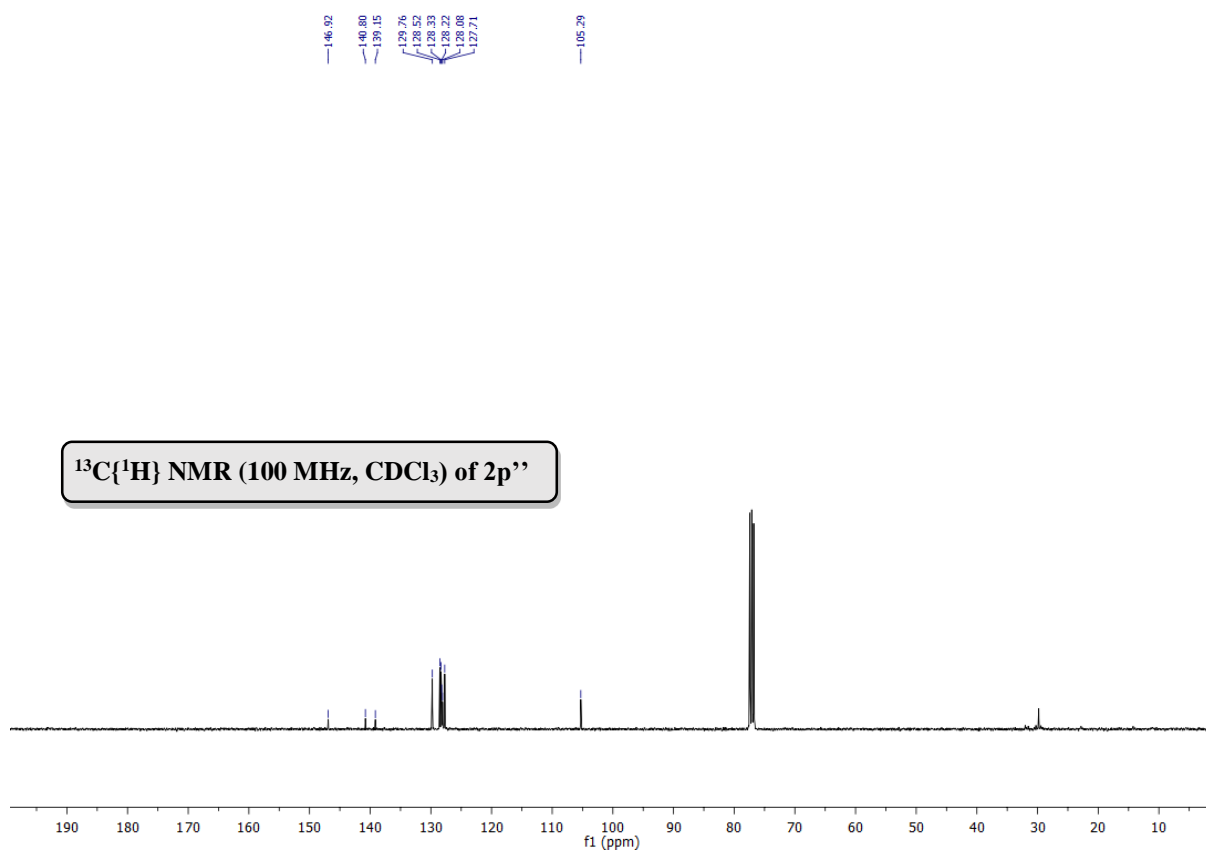

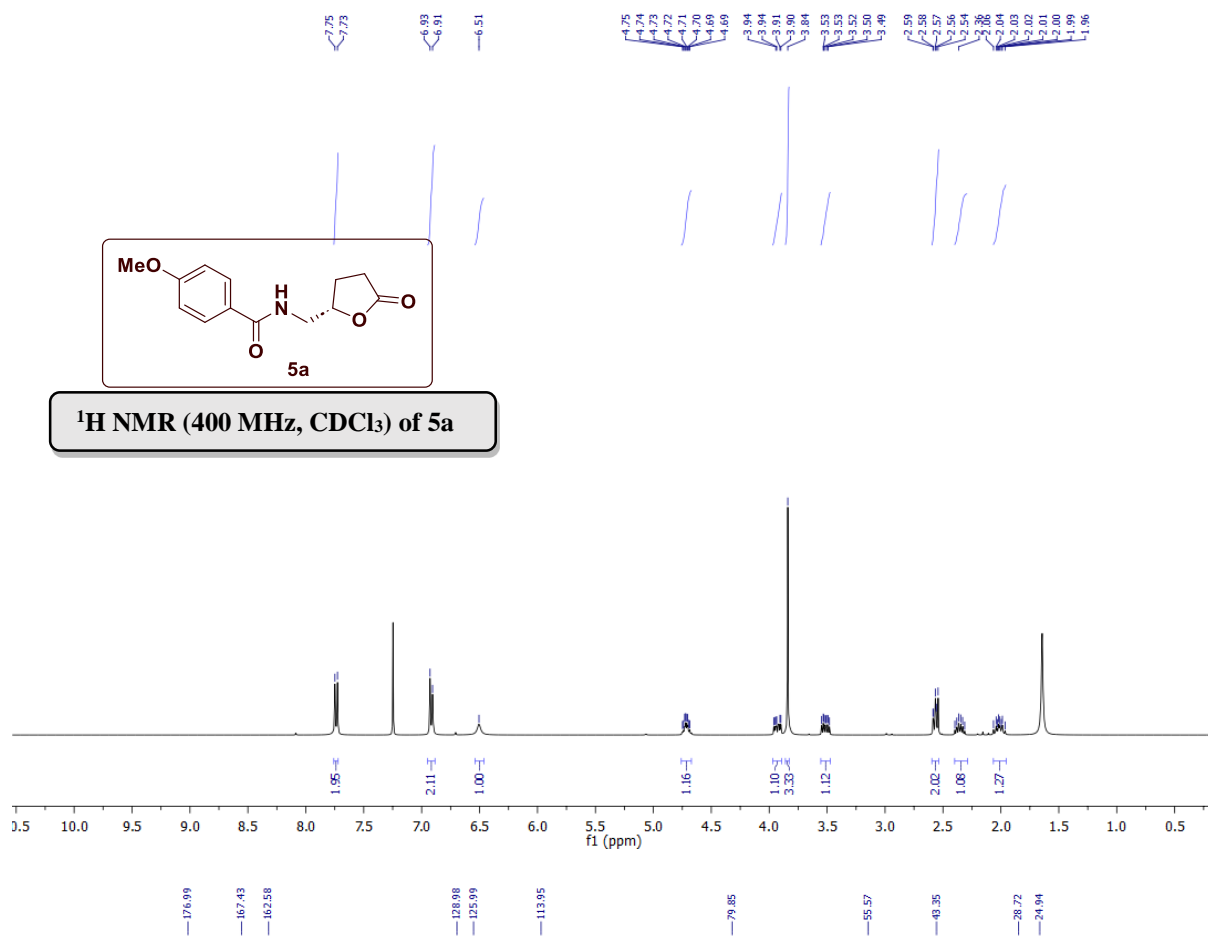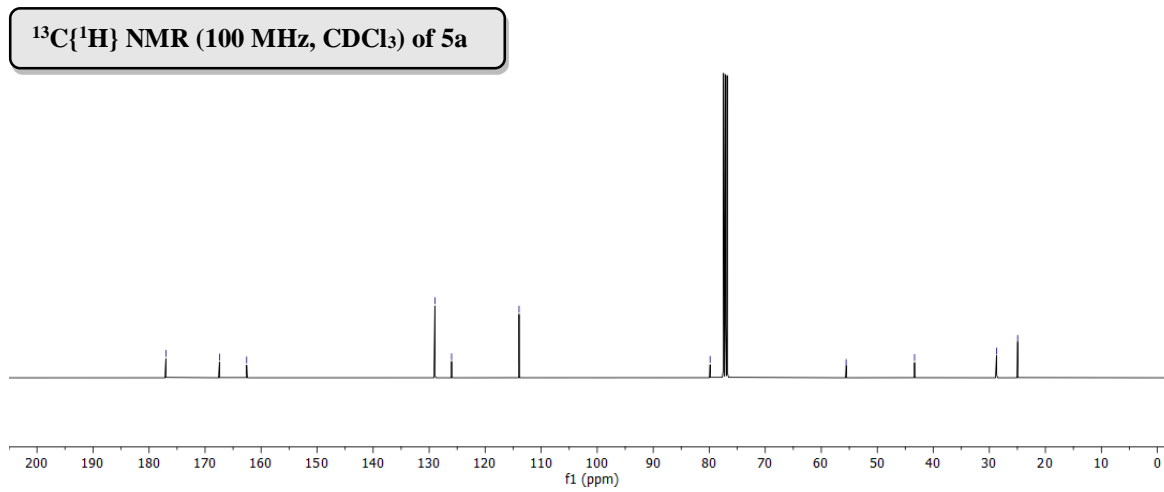

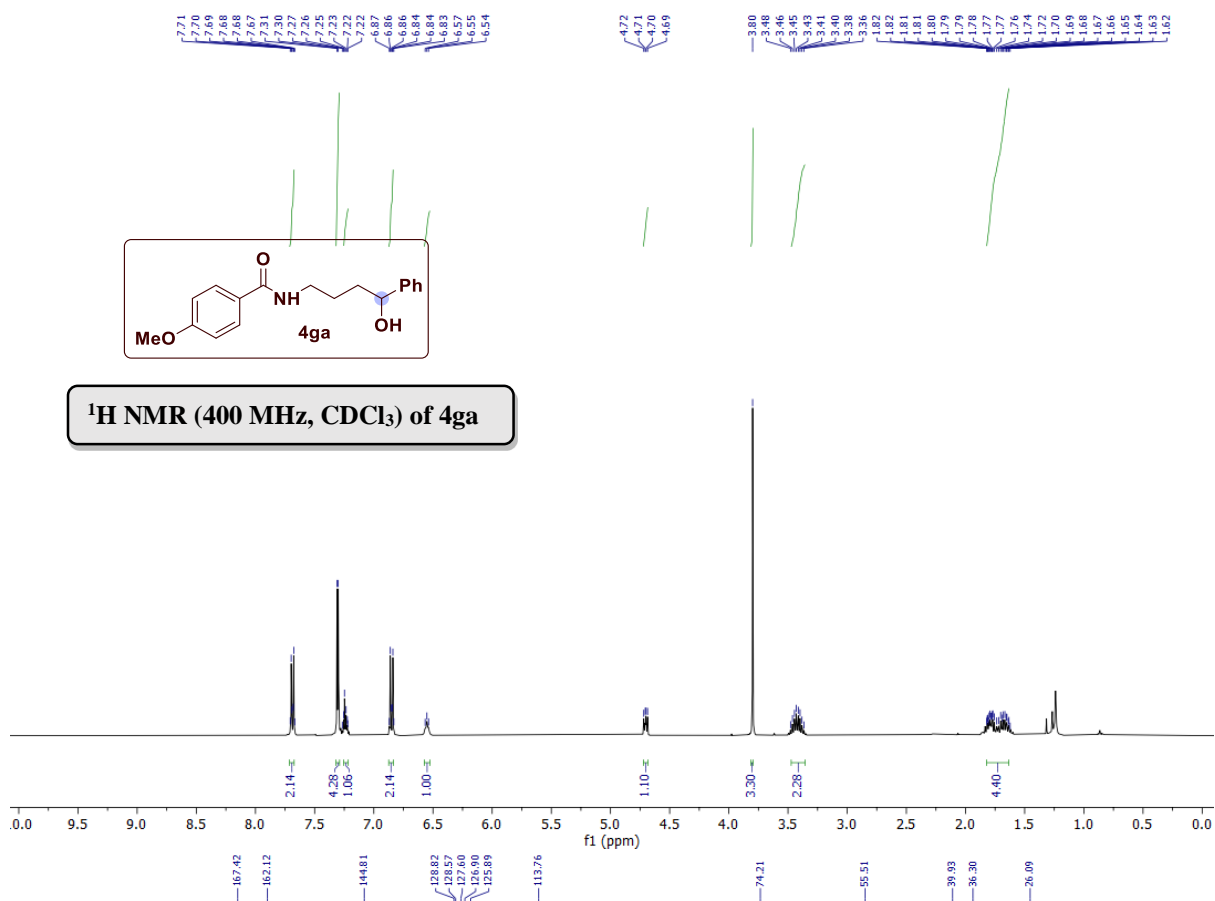

**<sup>13</sup>C{<sup>1</sup>H} NMR (100 MHz, CDCl<sub>3</sub>) of 4ga**

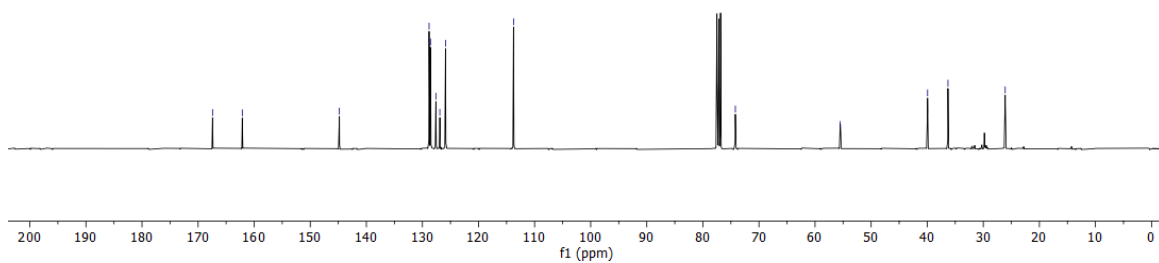

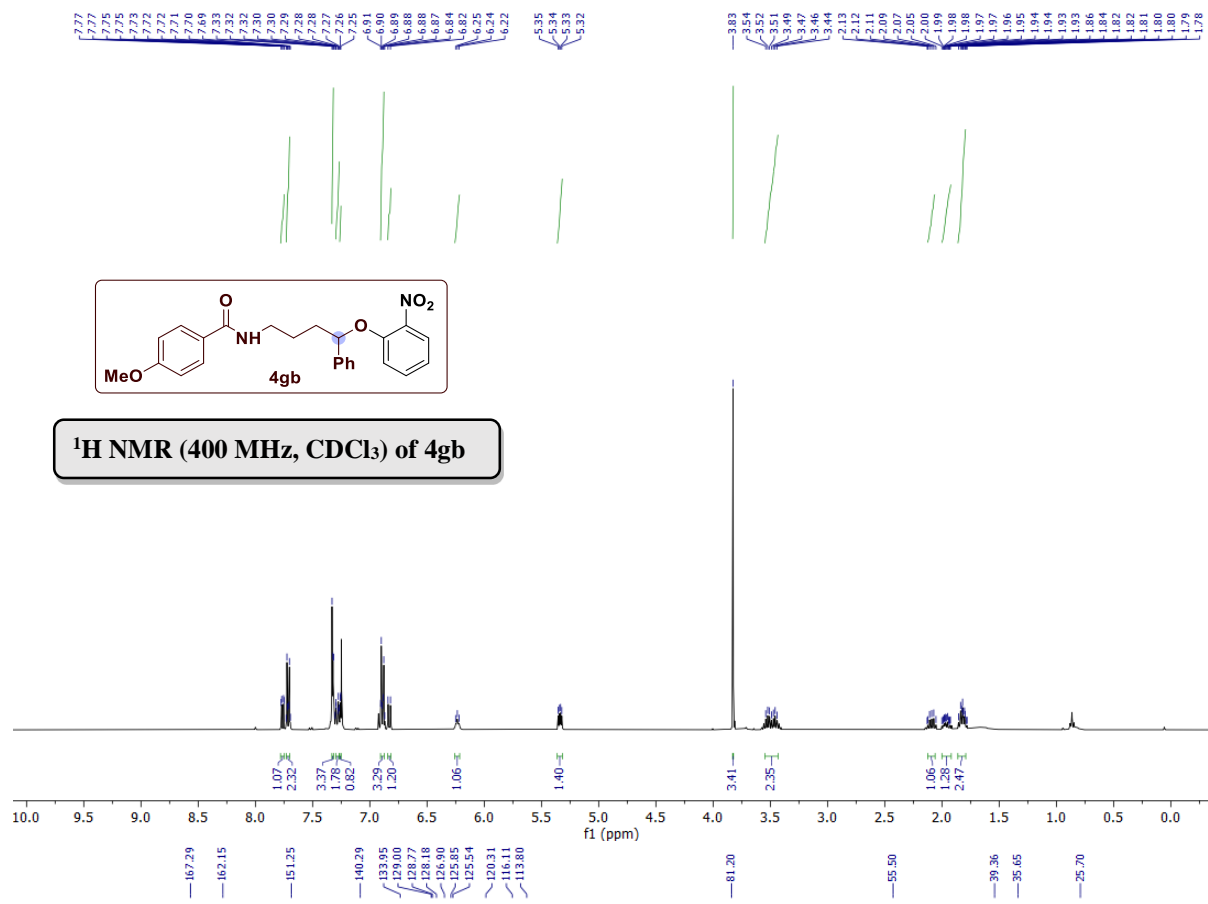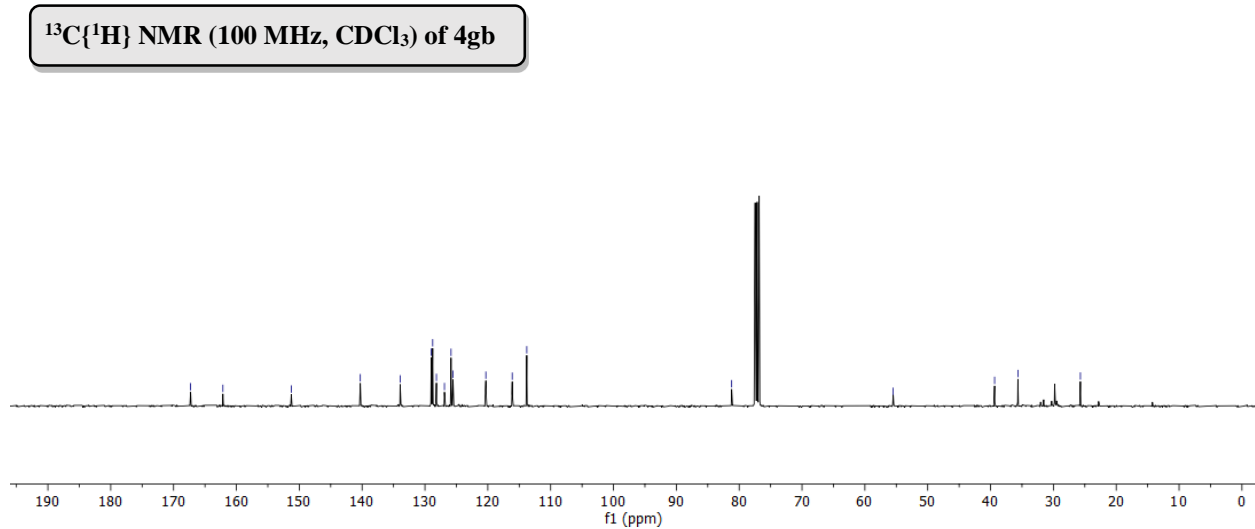

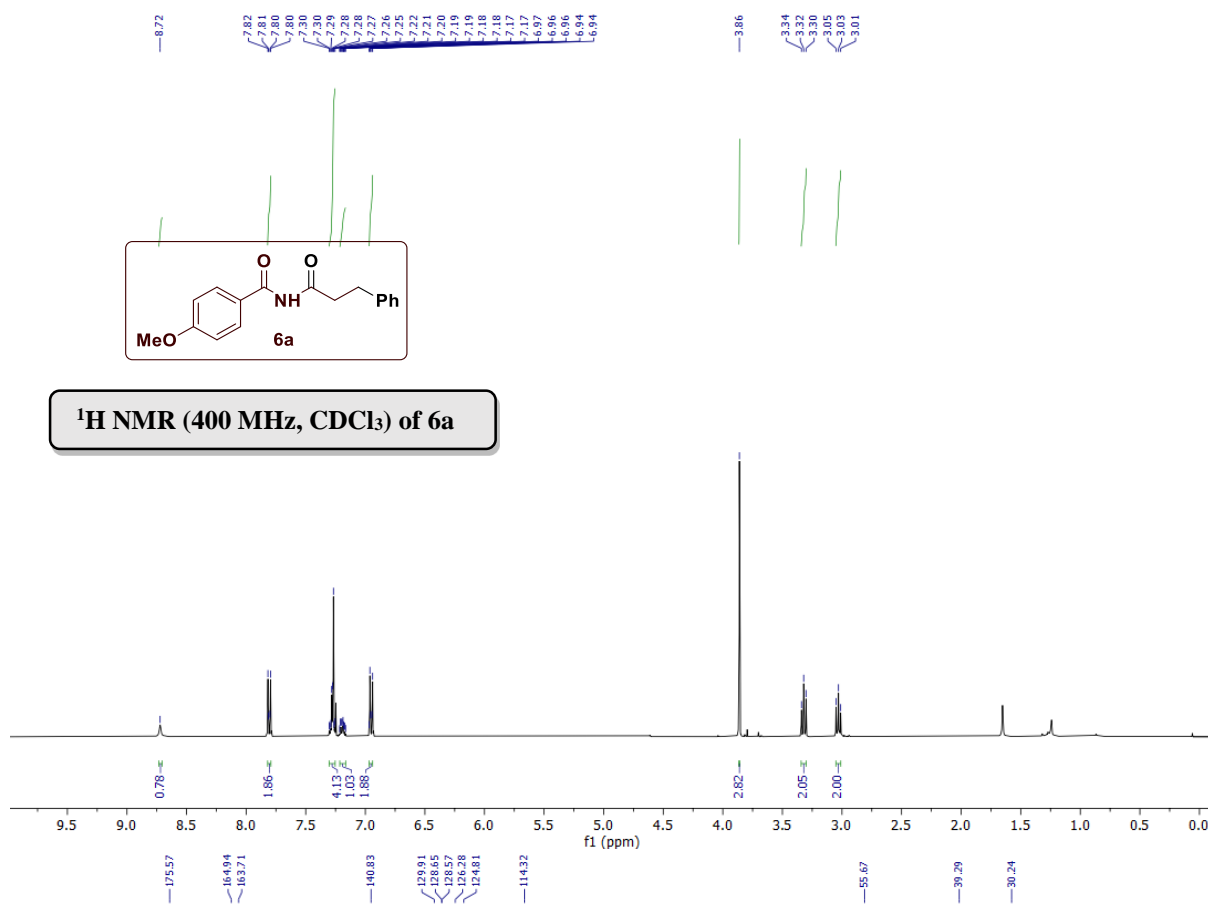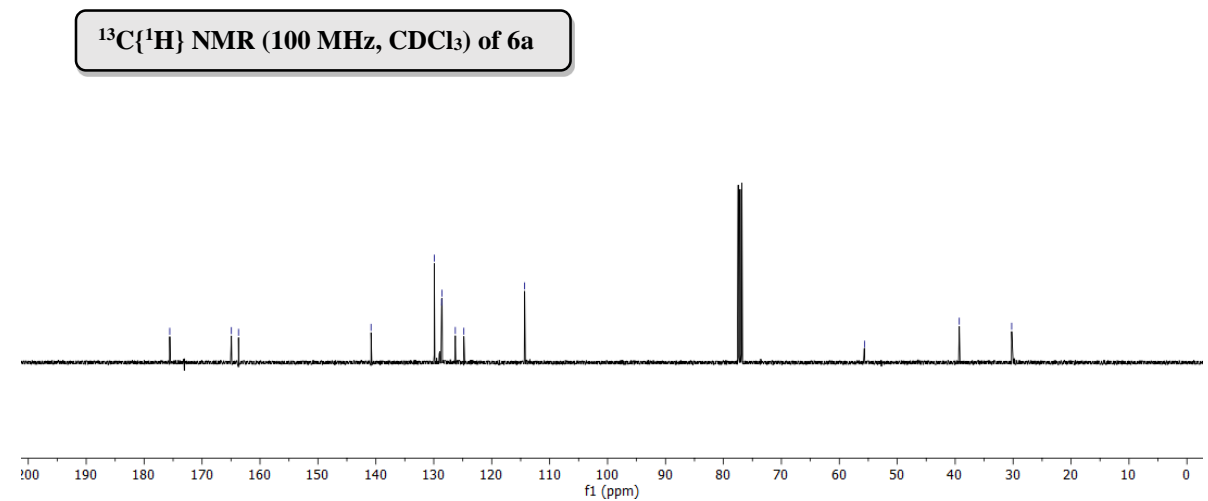

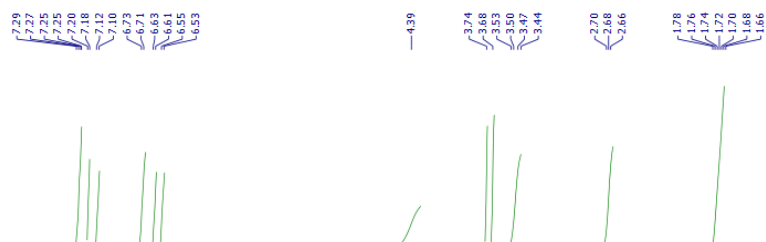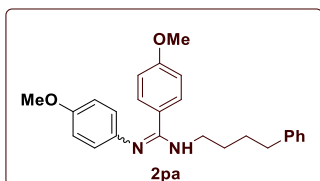

**<sup>1</sup>H NMR (400 MHz, CDCl<sub>3</sub>) of 2pa**

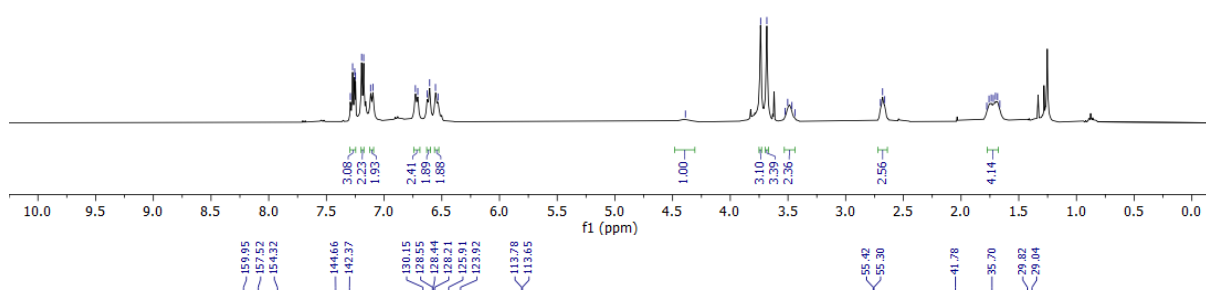

**<sup>13</sup>C{<sup>1</sup>H} NMR (100 MHz, CDCl<sub>3</sub>) of 2pa**

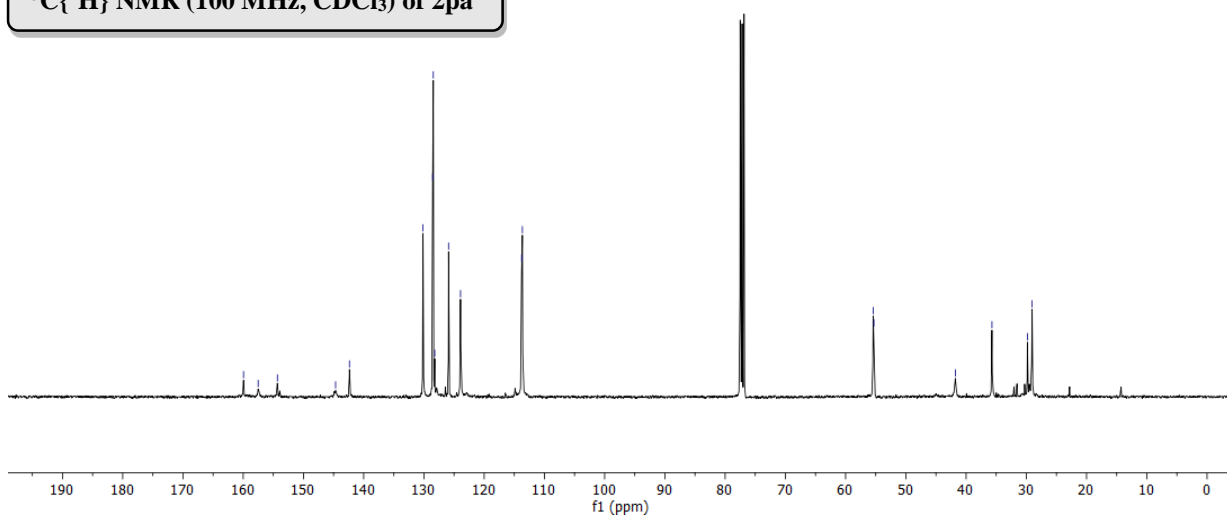

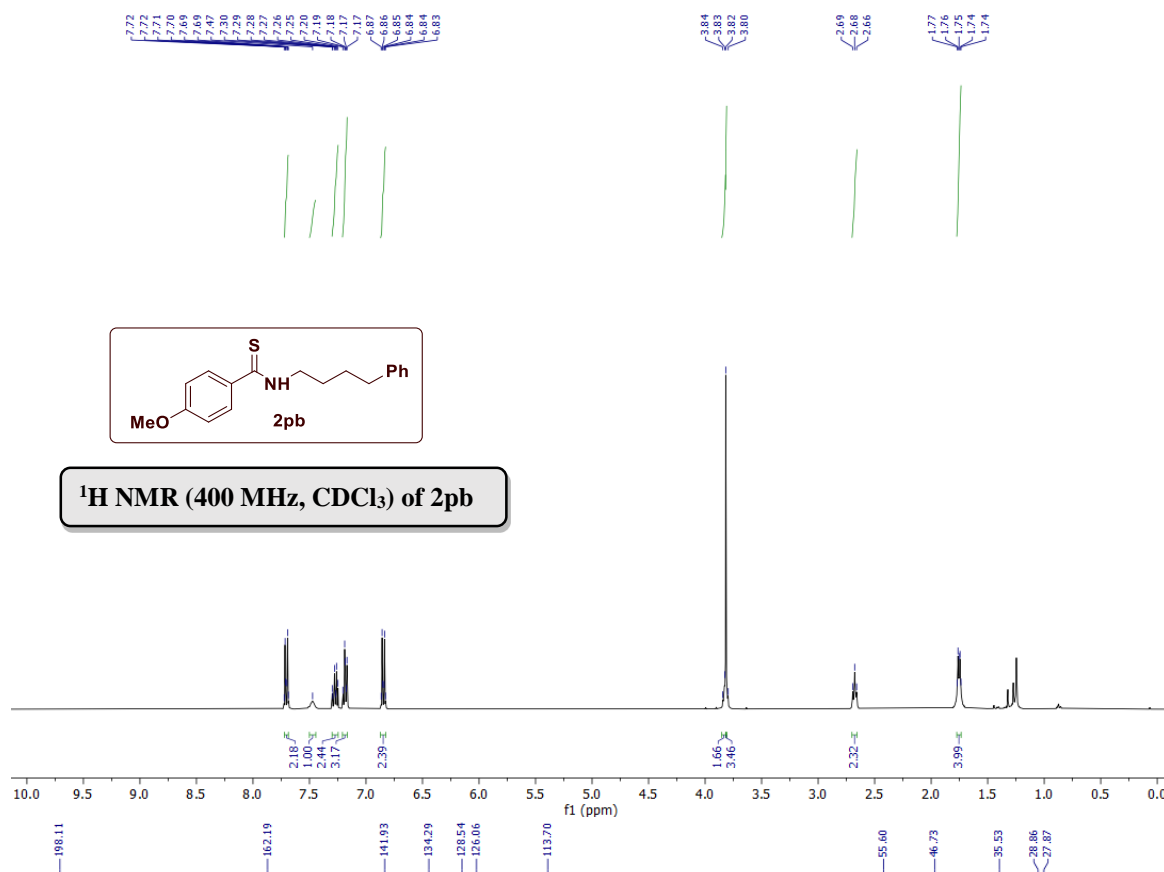

**<sup>13</sup>C{<sup>1</sup>H} NMR (100 MHz, CDCl<sub>3</sub>) of 2pb**

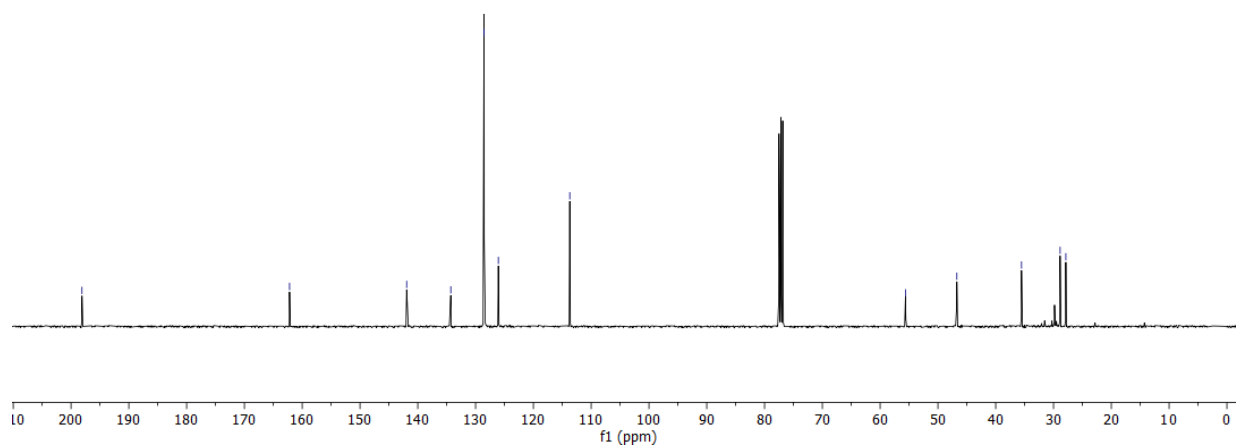

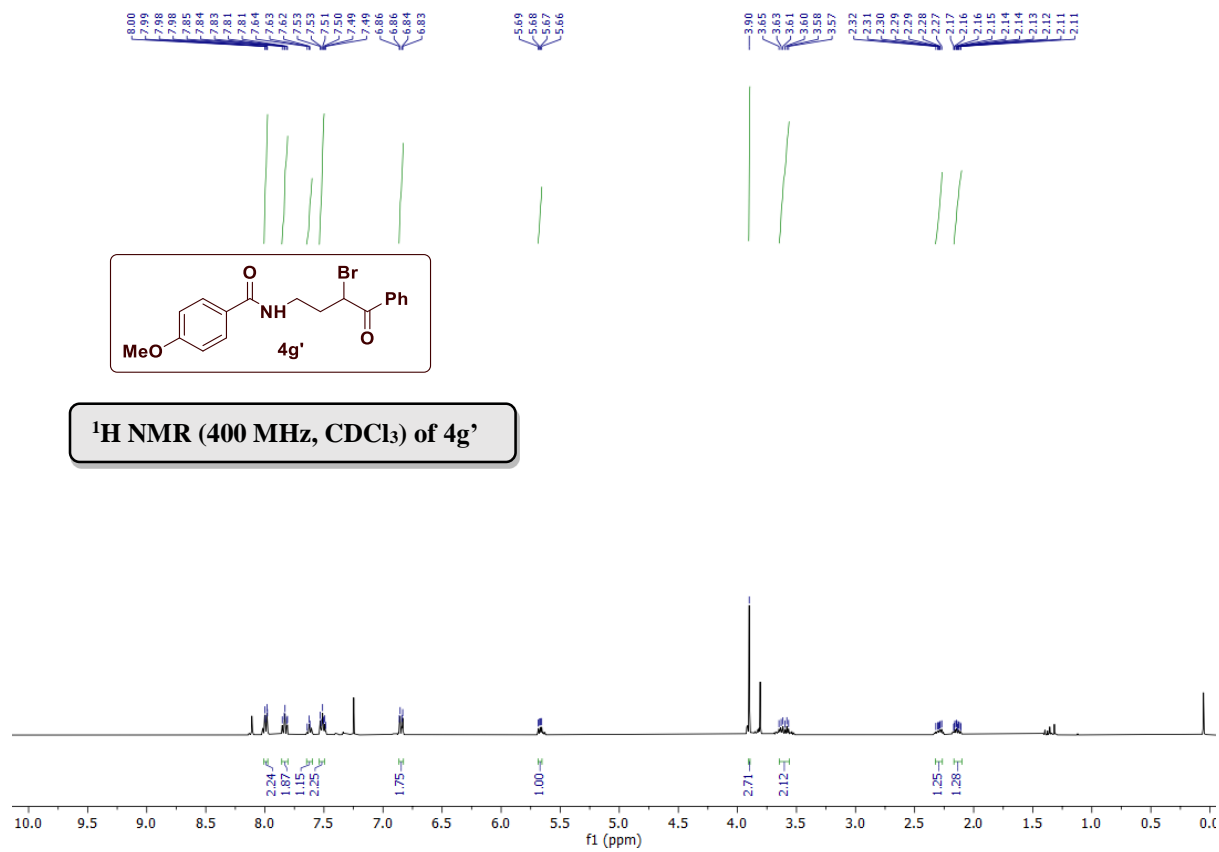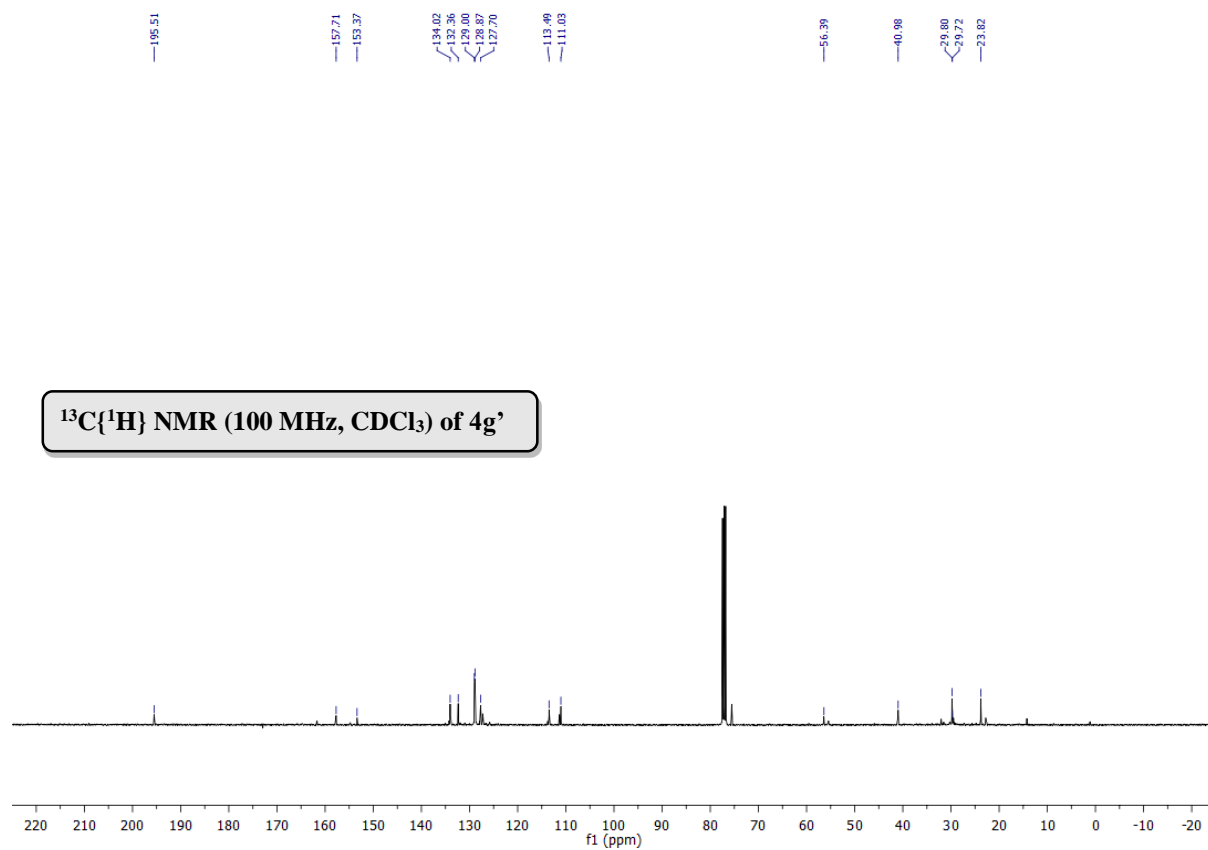

➤ HRMS of intermediates 2p', 2l', 2a' and 2p''

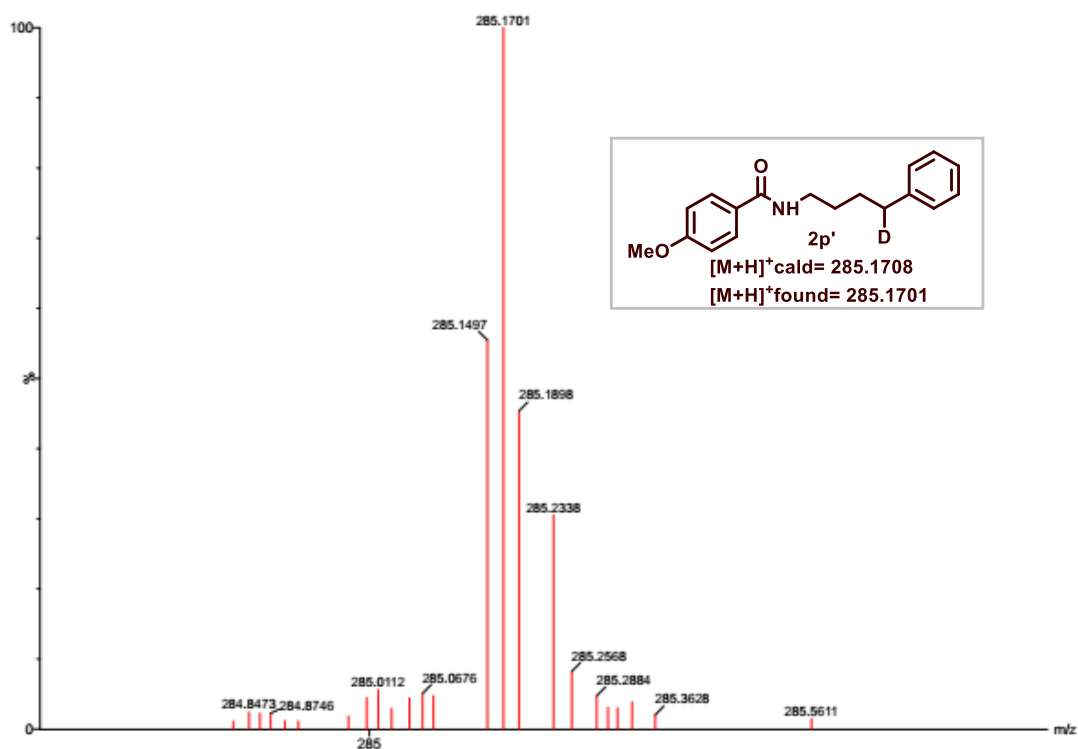

Single Mass Analysis

Tolerance = 100.0 PPM / DBE: min = -1.5, max = 50.0

Element prediction: Off

Number of isotope peaks used for i-FIT = 3

Monoisotopic Mass, Even Electron Ions

7 formula(e) evaluated with 1 results within limits (all results (up to 1000) for each mass)

Elements Used:

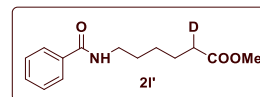

| Mass     | Calc. Mass | mDa | PPM | DBE | Formula          | i-FIT | i-FIT Norm | Fit Conf % | C  | N | O | 2H | 1H |
|----------|------------|-----|-----|-----|------------------|-------|------------|------------|----|---|---|----|----|
| 251.1516 | 251.1506   | 1.0 | 4.0 | 5.5 | C14 N O3 2H 1H19 | 83.8  | n/a        | n/a        | 14 | 1 | 3 | 1  | 19 |

190326\_43\_03\_001

190326\_43\_03\_001 11 (0.123)

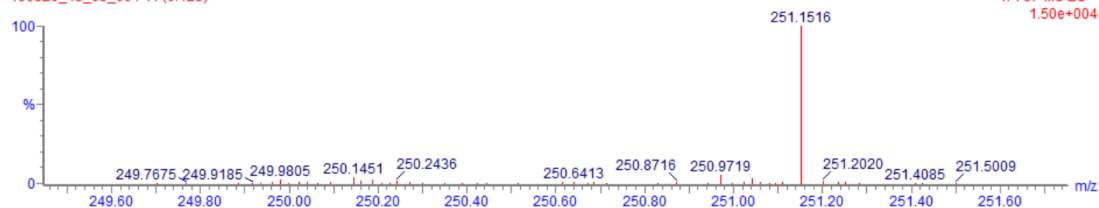

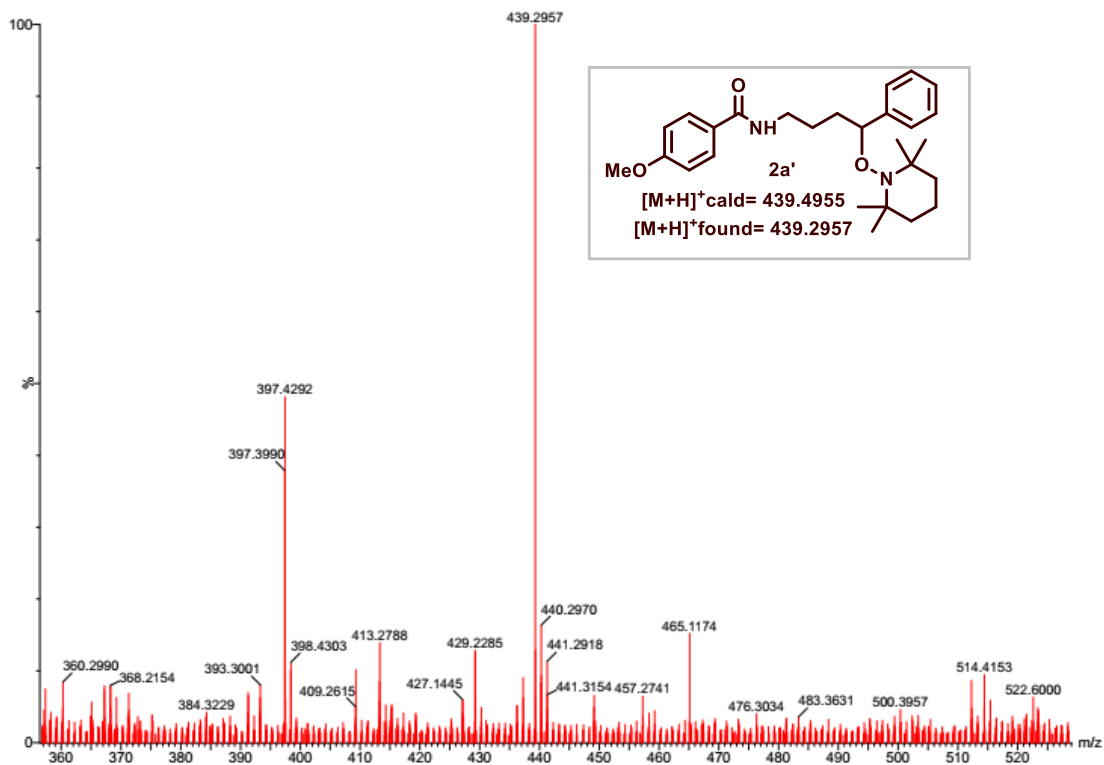

### Single Mass Analysis

Tolerance = 100.0 PPM / DBE: min = -1.5, max = 50.0

Element prediction: Off

Number of isotope peaks used for i-FIT = 3

Monoisotopic Mass, Even Electron Ions

2 formula(e) evaluated with 1 results within limits (all results (up to 1000) for each mass)

Elements Used:

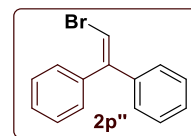

| Mass     | Calc. Mass | mDa  | PPM  | DBE | Formula                            | i-FIT | i-FIT Norm | Fit Conf % | C  | H  | Br |
|----------|------------|------|------|-----|------------------------------------|-------|------------|------------|----|----|----|
| 259.0117 | 259.0122   | -0.5 | -1.9 | 8.5 | C <sub>14</sub> H <sub>12</sub> Br | 264.7 | n/a        | n/a        | 14 | 12 | 1  |

20032026\_34\_05\_158

20032026\_34\_05\_158 47 (0.454)

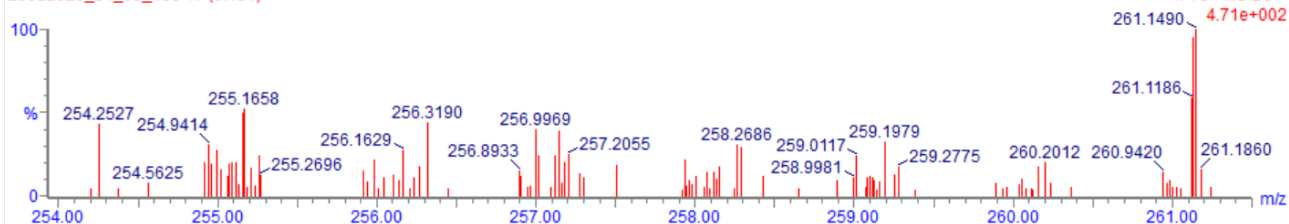

## L. References

1. K. Aida, M. Hirao, T. Saitoh, T. Yamamoto, Y. Einaga, E. Ota and J. Yamaguchi, *J. Am. Chem. Soc.*, 2024, **146**, 30698–30707.
2. W. Chen, A. Paul, K. A. Abboud and D. Seidel, *Nat. Chem.*, 2017, **10**, 165–169.
3. M. Szostak, M. Spain and D. J. Procter, *Angew. Chem. Int. Ed.*, 2013, **52**, 7237–7241.
4. L. Chen, Q. Qu, C.-K. Ran, W. Wang, W. Zhang, Y. He, L.-L. Liao, J.-H. Ye and D.-G. Yu, *Angew. Chem. Int. Ed.*, 2023, **62**, e202217918.
5. X. Fang, X. Hu, Q. Li, S. Ni and Z. Ruan, *Angew. Chem. Int. Ed.*, 2024, **64**, e202418277.
6. J. B. Roque, Y. Kuroda, L. T. Göttemann and R. Sarpong, *Nature*, 2018, **564**, 244–248.
7. S. Dutt, R. Kumar, N. Banerjee, D. Saha and P. Banerjee, *Adv. Synth. Catal.*, 2024, **366**, 526–532.
8. S. Sarkar, Rohit and M. W. Meanwell, *Green Chem.*, 2025, **27**, 2900–2906.
9. M. Lepori, D. I. Ioannou, J. P. Barham and T. Noël, *Chem. Sci.*, 2025, **16**, 22944–22951.
10. E. P. Arnold, P. K. Mondal and D. C. Schmitt, *ACS Comb. Sci.*, 2020, **22**, 1–5.
11. Y. Liu, X. Mo, I. Majeed, M. Zhang, H. Wang and Z. Zeng, *Org. Biomol. Chem.*, 2022, **20**, 1532–1537.
12. D. J. C. Constable, A. D. Curzons and V. L. Cunningham, *Green Chem.*, 2002, **4**, 521–527.
13. L. H. Bluhm and T. Li, *Tetrahedron Letters*, 1998, **39**, 3623–3626.
14. C. Schotten, T. P. Nicholls, R. A. Bourne, N. Kapur, B. N. Nguyen and C. E. Willans, *Green Chem.*, 2020, **22**, 3358–3375.
